# Supplementary material for: ANXA6 Contributes to Radioresistance by Promoting Autophagy via Inhibiting the PI3K/AKT/mTOR Signaling Pathway in Nasopharyngeal Carcinoma
Source: Front Cell Dev Biol. 2020 Apr 16;8:232. doi: 10.3389/fcell.2020.00232 (PMC7176914; doi:10.3389/fcell.2020.00232)
Supplement: Supplementary file 4 [file Table_3.xlsx]

## Sheet: Quant
Supplementary Table S3 Differential gene expression in Gene Chip Analysis
Representative Public ID	UniGene ID	Entrez Gene	Target Description	Gene Title	Gene Symbol	Chromosomal Location	RefSeq Protein ID	RefSeq Transcript ID	G2_1201849	G2_1213446	G2_1311345	G3_1413744	G3_1306192	G3_1404445	Fold Change_G3vsG2	P value_G3vsG2	Regulated Type
AF233225	Hs.5912 /// Hs.628106 /// Hs.736991	25793	gb:AF233225.1 /DB_XREF=gi:7677408 /GEN=FBX /TID=Hs2.5912.2 /CNT=31 /FEA=FLmRNA /TIER=FL /STK=1 /LL=25793 /UG=Hs.5912 /DEF=Homo sapiens F-box protein FBX (FBX) mRNA, complete cds. /PROD=F-box protein FBX /FL=gb:AF233225.1	F-box protein 7	FBXO7	chr22q12-q13	NP_001028196 /// NP_001244919 /// NP_036311	NM_001033024 /// NM_001257990 /// NM_012179	4.86873	4.7207	4.87655	8.62225	7.73304	7.95174	10.0563	0.00519158	Up
BF795297	Hs.24485 /// Hs.678733	9126	gb:BF795297 /DB_XREF=gi:12100351 /DB_XREF=602256270F1 /CLONE=IMAGE:4339721 /FEA=FLmRNA /CNT=124 /TID=Hs.24485.0 /TIER=Stack /STK=9 /UG=Hs.24485 /LL=9126 /UG_GENE=CSPG6 /UG_TITLE=chondroitin sulfate proteoglycan 6 (bamacan) /FL=gb:AF067163.1 gb:NM_005445.1 gb:AF020043.1	structural maintenance of chromosomes 3	SMC3	chr10q25	NP_005436	NM_005445	3.71022	3.77517	3.83399	7.23699	6.3916	6.20259	7.516	0.0150531	Up
BE793789	Hs.113876	7468	gb:BE793789 /DB_XREF=gi:10214987 /DB_XREF=601589946F1 /CLONE=IMAGE:3944195 /FEA=FLmRNA /CNT=235 /TID=Hs.110457.3 /TIER=Stack /STK=20 /UG=Hs.110457 /LL=7468 /UG_GENE=WHSC1 /UG_TITLE=Wolf-Hirschhorn syndrome candidate 1 /FL=gb:AF083389.1	Wolf-Hirschhorn syndrome candidate 1	WHSC1	chr4p16.3	NP_001035889 /// NP_015627 /// NP_579877 /// NP_579878 /// NP_579889 /// NP_579890	NM_001042424 /// NM_007331 /// NM_014919 /// NM_133330 /// NM_133331 /// NM_133332 /// NM_133333 /// NM_133334 /// NM_133335 /// NM_133336	3.83486	4.75684	3.68741	7.52584	6.4171	6.45305	6.59464	0.0439857	Up
NM_052885	Hs.558595 /// Hs.632705 /// Hs.649939	114134	gb:NM_052885.1 /DB_XREF=gi:16418394 /GEN=SLC2A13 /TID=Hs2.117979.1 /CNT=13 /FEA=FLmRNA /TIER=FL /STK=2 /LL=114134 /UG=Hs.117979 /DEF=Homo sapiens solute carrier family 2 (facilitated glucose transporter), member 13 (SLC2A13), mRNA. /PROD=solute carrier family 2 (facilitated glucosetransporter), member 13 /FL=gb:NM_052885.1	solute carrier family 2 (facilitated glucose transporter), member 13	SLC2A13	chr12q12	NP_443117	NM_052885	3.26183	1.66883	4.15289	6.83277	4.16084	6.12098	6.59273	0.0296922	Up
NM_006111	Hs.200136 /// Hs.573627	10449	gb:NM_006111.1 /DB_XREF=gi:5174428 /GEN=ACAA2 /FEA=FLmRNA /CNT=253 /TID=Hs.32500.0 /TIER=FL+Stack /STK=94 /UG=Hs.32500 /LL=10449 /DEF=Homo sapiens acetyl-Coenzyme A acyltransferase 2 (mitochondrial 3-oxoacyl-Coenzyme A thiolase) (ACAA2), nuclear gene encoding mitochondrial protein, mRNA. /PROD=acetyl-Coenzyme A acyltransferase 2(mitochondrial 3-oxoacyl-Coenzyme A thiolase) /FL=gb:BC001918.1 gb:NM…	acetyl-CoA acyltransferase 2	ACAA2	chr18q21.1	NP_006102	NM_006111	4.45925	4.4832	3.04212	7.31573	6.61661	4.61403	5.35996	0.0276998	Up
BC025770	Hs.656339	57381	gb:BC025770.1 /DB_XREF=gi:19344025 /TID=Hs2.243010.2 /CNT=2 /FEA=FLmRNA /TIER=FL /STK=1 /LL=57381 /UG_GENE=ARHJ /UG=Hs.243010 /DEF=Homo sapiens, Similar to TC10-like Rho GTPase, clone MGC:34777 IMAGE:5210490, mRNA, complete cds. /PROD=Similar to TC10-like Rho GTPase /FL=gb:BC025770.1	ras homolog family member J	RHOJ	chr14q23.2	NP_065714	NM_020663	3.55467	3.52167	3.42445	5.58032	5.75325	5.69231	4.51819	0.00120027	Up
AK024883	Hs.514116 /// Hs.604188 /// Hs.624642 /// Hs.668848 /// Hs.670482	79893	gb:AK024883.1 /DB_XREF=gi:10437295 /FEA=mRNA /CNT=2 /TID=Hs.180799.1 /TIER=ConsEnd /STK=1 /UG=Hs.180799 /LL=79893 /UG_GENE=FLJ22561 /UG_TITLE=hypothetical protein FLJ22561 /DEF=Homo sapiens cDNA: FLJ21230 fis, clone COL00741.	gametogenetin binding protein 2	GGNBP2	chr17q12	NP_079111	NM_024835	7.2607	6.45131	4.75387	9.64114	7.61038	7.02849	4.19826	0.0383163	Up
BC000878	Hs.118554 /// Hs.595681	51110	gb:BC000878.1 /DB_XREF=gi:12654126 /FEA=FLmRNA /CNT=88 /TID=Hs.118554.0 /TIER=FL /STK=0 /UG=Hs.118554 /LL=51110 /UG_GENE=LOC51110 /DEF=Homo sapiens, CGI-83 protein, clone MGC:4879, mRNA, complete cds. /PROD=CGI-83 protein /FL=gb:NM_016027.1 gb:BC000878.1 gb:AF151841.1	lactamase, beta 2	LACTB2	chr8q13.3	NP_057111	NM_016027	2.49089	2.52166	2.70867	5.16856	4.16268	4.04279	3.9304	0.0435188	Up
BC041993	Hs.679092	100505716	gb:BC041993.1 /DB_XREF=gi:27469543 /TID=Hs2.434513.1 /CNT=2 /FEA=mRNA /TIER=ConsEnd /STK=1 /UG=Hs.434513 /UG_TITLE=Homo sapiens, clone IMAGE:5304009, mRNA /DEF=Homo sapiens, clone IMAGE:5304009, mRNA.	uncharacterized LOC100505716	LOC100505716	chr2p23	---	NR_038319	3.46172	4.10097	3.98109	4.75752	6.54121	5.47066	3.74185	0.0388323	Up
BG285274	Hs.518084 /// Hs.614519 /// Hs.636008	116064	gb:BG285274 /DB_XREF=gi:13037245 /DB_XREF=602409719F1 /CLONE=IMAGE:4539268 /FEA=EST /CNT=10 /TID=Hs.112526.0 /TIER=ConsEnd /STK=0 /UG=Hs.112526 /UG_TITLE=ESTs	leucine rich repeat containing 58	LRRC58	chr3q13.33	NP_001093148	NM_001099678	3.05121	3.70092	3.35667	4.58232	5.15268	5.73045	3.57107	0.0262277	Up
NM_003235	Hs.654591	7038	gb:NM_003235.2 /DB_XREF=gi:6631113 /GEN=TG /FEA=FLmRNA /CNT=481 /TID=Hs.305916.0 /TIER=FL+Stack /STK=148 /UG=Hs.305916 /LL=7038 /DEF=Homo sapiens thyroglobulin (TG), mRNA. /PROD=thyroglobulin /FL=gb:U93033.2 gb:NM_003235.2	thyroglobulin	TG	chr8q24	NP_003226	NM_003235	6.8412	3.95944	3.2763	8.18534	7.06185	6.19979	3.56106	0.0480194	Up
NM_024087	Hs.19404 /// Hs.717671	140462	gb:NM_024087.1 /DB_XREF=gi:13443013 /GEN=DKFZP564L0862 /FEA=FLmRNA /CNT=38 /TID=Hs.19404.0 /TIER=FL+Stack /STK=21 /UG=Hs.19404 /LL=25954 /DEF=Homo sapiens DKFZP564L0862 protein (DKFZP564L0862), mRNA. /PROD=hypothetical protein FLJ20636 /FL=gb:NM_024087.1	ankyrin repeat and SOCS box containing 9	ASB9	chrXp22.2	NP_001026909 /// NP_001162002 /// NP_001162003 /// NP_076992	NM_001031739 /// NM_001168530 /// NM_001168531 /// NM_024087	3.51689	3.22579	3.50185	4.75384	4.55064	5.93514	3.47342	0.0495193	Up
NM_000945	Hs.280604 /// Hs.697568	5534	gb:NM_000945.1 /DB_XREF=gi:4506024 /GEN=PPP3R1 /FEA=FLmRNA /CNT=54 /TID=Hs.278540.0 /TIER=FL /STK=6 /UG=Hs.278540 /LL=5534 /DEF=Homo sapiens protein phosphatase 3 (formerly 2B), regulatory subunit B (19kD), alpha isoform (calcineurin B, type I) (PPP3R1), mRNA. /PROD=protein phosphatase 3 (formerly 2B), regulatorysubunit B (19kD), alpha isoform (calcineurin B, type I) /FL=gb:M30773.1 gb:NM_000945.1	protein phosphatase 3, regulatory subunit B, alpha	PPP3R1	chr2p15	NP_000936	NM_000945	4.63682	4.54047	4.44166	6.06526	6.2527	6.63599	3.47265	0.0154372	Up
BF435809	Hs.440320 /// Hs.679672 /// Hs.732754 /// Hs.744123	8065	gb:BF435809 /DB_XREF=gi:11448124 /DB_XREF=nab42a09.x1 /CLONE=IMAGE:3268504 /FEA=FLmRNA /CNT=105 /TID=Hs.101299.0 /TIER=Stack /STK=17 /UG=Hs.101299 /LL=8065 /UG_GENE=CUL5 /UG_TITLE=cullin 5 /FL=gb:AF017061.1 gb:NM_003478.1 gb:AF327710.1	cullin 5	CUL5	chr11q22.3	NP_003469	NM_003478	5.31597	4.30603	4.60912	7.17134	5.99543	6.26595	3.39074	0.00125469	Up
AL096714	Hs.473788	55611	Cluster Incl. AL096714:Homo sapiens mRNA; cDNA DKFZp564E242 (from clone DKFZp564E242) /cds=UNKNOWN /gb=AL096714 /gi=5419847 /ug=Hs.108504 /len=1904	OTU domain, ubiquitin aldehyde binding 1	OTUB1	chr11q13.1	NP_060140	NM_017670 /// NR_003089	7.23276	7.25192	6.14389	9.49121	8.58505	7.30627	3.37839	0.0431971	Up
AV683684	Hs.546291 /// Hs.654475 /// Hs.690561	6232	gb:AV683684 /DB_XREF=gi:10285547 /DB_XREF=AV683684 /CLONE=GKCBIH09 /FEA=EST /CNT=9 /TID=Hs.40838.0 /TIER=ConsEnd /STK=0 /UG=Hs.40838 /UG_TITLE=ESTs	ribosomal protein S27	RPS27	chr1q21	NP_001021	NM_001030	3.19054	3.60921	3.29093	5.04619	5.49193	4.55625	3.2638	0.0142747	Up
W86302	Hs.407190 /// Hs.670361	2289	gb:W86302 /DB_XREF=gi:1398761 /DB_XREF=zh54g08.s1 /CLONE=IMAGE:415934 /FEA=mRNA /CNT=133 /TID=Hs.7557.1 /TIER=Stack /STK=11 /UG=Hs.7557 /LL=2289 /UG_GENE=FKBP5 /UG_TITLE=FK506-binding protein 5	FK506 binding protein 5	FKBP5	chr6p21.31	NP_001139247 /// NP_001139248 /// NP_001139249 /// NP_004108	NM_001145775 /// NM_001145776 /// NM_001145777 /// NM_004117	4.62613	6.44032	6.94679	6.93352	7.95192	8.6035	3.23033	0.0175019	Up
BC005354	Hs.437594	6181	gb:BC005354.1 /DB_XREF=gi:13529169 /FEA=FLmRNA /CNT=481 /TID=Hs.119500.0 /TIER=ConsEnd /STK=0 /UG=Hs.119500 /LL=6181 /UG_GENE=RPLP2 /DEF=Homo sapiens, ribosomal protein, large P2, clone MGC:12453, mRNA, complete cds. /PROD=ribosomal protein, large P2 /FL=gb:M17887.1 gb:BC005354.1 gb:NM_001004.1	ribosomal protein, large, P2	RPLP2	chr11p15.5	NP_000995	NM_001004	7.91524	8.34917	7.20284	9.26772	9.92671	9.37282	3.15138	0.0199543	Up
AI627636	Hs.597561 /// Hs.683864 /// Hs.741921	400960	gb:AI627636 /DB_XREF=gi:4664436 /DB_XREF=ty81a08.x1 /CLONE=IMAGE:2285462 /FEA=EST /CNT=48 /TID=Hs.30082.0 /TIER=Stack /STK=31 /UG=Hs.30082 /UG_TITLE=ESTs	PCBP1 antisense RNA 1	PCBP1-AS1	chr2p14	---	NR_033872	3.72589	3.52407	4.06459	5.60658	4.68658	5.77706	3.11837	0.0182054	Up
AL562908	Hs.388297	286053	gb:AL562908 /DB_XREF=gi:12911797 /DB_XREF=AL562908 /CLONE=CS0DC021YN07 (3 prime) /FEA=EST /CNT=39 /TID=Hs.58609.0 /TIER=Stack /STK=25 /UG=Hs.58609 /UG_TITLE=ESTs	non-SMC element 2, MMS21 homolog (S. cerevisiae)	NSMCE2	chr8q24.13	NP_775956	NM_173685	4.64685	4.31059	4.3268	6.40519	5.40284	6.23241	3.11327	0.0240139	Up
NM_000178	Hs.82327	2937	gb:NM_000178.1 /DB_XREF=gi:4504168 /GEN=GSS /FEA=FLmRNA /CNT=328 /TID=Hs.82327.0 /TIER=FL+Stack /STK=86 /UG=Hs.82327 /LL=2937 /DEF=Homo sapiens glutathione synthetase (GSS), mRNA. /PROD=glutathione synthetase /FL=gb:NM_000178.1 gb:U34683.1	glutathione synthetase	GSS	chr20q11.2	NP_000169	NM_000178	6.20973	7.79781	7.95409	8.28876	9.36151	9.48267	3.09624	0.0104862	Up
NM_002882	Hs.24763	5902	gb:NM_002882.2 /DB_XREF=gi:6382077 /GEN=RANBP1 /FEA=FLmRNA /CNT=148 /TID=Hs.24763.0 /TIER=FL+Stack /STK=19 /UG=Hs.24763 /LL=5902 /DEF=Homo sapiens RAN binding protein 1 (RANBP1), mRNA. /PROD=RAN binding protein 1 /FL=gb:D38076.1 gb:NM_002882.2	RAN binding protein 1	RANBP1	chr22q11.21	NP_002873	NM_002882	4.78843	4.42269	4.84048	6.5047	5.45699	6.69792	3.06886	0.0263004	Up
M92934	Hs.410037 /// Hs.641595	1490	gb:M92934.1 /DB_XREF=gi:180923 /FEA=FLmRNA /CNT=291 /TID=Hs.75511.0 /TIER=FL /STK=0 /UG=Hs.75511 /LL=1490 /UG_GENE=CTGF /DEF=Human connective tissue growth factor, complete cds. /PROD=connective tissue growth factor /FL=gb:NM_001901.1 gb:M92934.1	connective tissue growth factor	CTGF	chr6q23.1	NP_001892	NM_001901	3.56583	4.64781	4.32542	4.86557	6.53928	5.68992	3.05101	0.0148876	Up
BE669782	Hs.258855 /// Hs.608080 /// Hs.618976 /// Hs.619153 /// Hs.704510 /// Hs.717330 /// Hs.718224 /// Hs.734355 /// Hs.734849	4297	gb:BE669782 /DB_XREF=gi:10030323 /DB_XREF=7e35h03.x1 /CLONE=IMAGE:3284501 /FEA=EST /CNT=3 /TID=Hs.283407.0 /TIER=ConsEnd /STK=3 /UG=Hs.283407 /UG_TITLE=ESTs	lysine (K)-specific methyltransferase 2A	KMT2A	chr11q23	NP_001184033 /// NP_005924	NM_001197104 /// NM_005933 /// NM_024891	4.48876	3.08158	3.2198	5.934	4.70386	5.1001	3.01982	0.00581486	Up
BC000101	Hs.197071 /// Hs.623608	10783	gb:BC000101.1 /DB_XREF=gi:12652704 /FEA=FLmRNA /CNT=159 /TID=Hs.9625.2 /TIER=FL /STK=7 /UG=Hs.9625 /LL=10783 /UG_GENE=NEK6 /DEF=Homo sapiens, NIMA (never in mitosis gene a)-related kinase 6, clone MGC:1205, mRNA, complete cds. /PROD=NIMA (never in mitosis gene a)-related kinase 6 /FL=gb:BC000101.1	NIMA-related kinase 6	NEK6	chr9q33.3-q34.11	NP_001138473 /// NP_001159639 /// NP_001159640 /// NP_001159641 /// NP_001159642 /// NP_001159643 /// NP_055212	NM_001145001 /// NM_001166167 /// NM_001166168 /// NM_001166169 /// NM_001166170 /// NM_001166171 /// NM_014397	4.75642	5.28262	5.9587	6.24861	7.31335	7.22535	3.00222	0.019566	Up
NM_005597	Hs.170131 /// Hs.560695 /// Hs.569985	4782	gb:NM_005597.1 /DB_XREF=gi:10835080 /GEN=NFIC /FEA=FLmRNA /CNT=8 /TID=Hs.184771.0 /TIER=FL /STK=4 /UG=Hs.184771 /LL=4782 /DEF=Homo sapiens nuclear factor IC (CCAAT-binding transcription factor) (NFIC), mRNA. /PROD=nuclear factor IC (CCAAT-binding transcriptionfactor) /FL=gb:NM_005597.1	nuclear factor I/C (CCAAT-binding transcription factor)	NFIC	chr19p13.3	NP_001231931 /// NP_001231933 /// NP_001231934 /// NP_005588 /// NP_995315	NM_001245002 /// NM_001245004 /// NM_001245005 /// NM_005597 /// NM_205843	5.85804	6.24605	6.9058	7.69501	7.71769	8.37417	2.95305	0.00585012	Up
BF735901	Hs.140443	134492	gb:BF735901 /DB_XREF=gi:12062601 /DB_XREF=QV1-KT0023-131100-480-g01 /FEA=EST /CNT=57 /TID=Hs.106129.0 /TIER=ConsEnd /STK=0 /UG=Hs.106129 /UG_TITLE=ESTs	NudC domain containing 2	NUDCD2	chr5q34	NP_660309	NM_145266	3.48981	3.49747	5.07407	4.96181	5.37617	6.54344	2.95252	0.00708988	Up
BC000606	Hs.446522	9045	gb:BC000606.1 /DB_XREF=gi:12653648 /FEA=FLmRNA /CNT=425 /TID=Hs.738.0 /TIER=ConsEnd /STK=0 /UG=Hs.738 /LL=9045 /UG_GENE=RPL14 /DEF=Homo sapiens, Similar to ribosomal protein L14, clone MGC:1644, mRNA, complete cds. /PROD=Similar to ribosomal protein L14 /FL=gb:D87735.1 gb:BC000606.1 gb:NM_003973.1	ribosomal protein L14	RPL14	chr3p22-p21.2	NP_001030168 /// NP_003964	NM_001034996 /// NM_003973	7.84403	7.71074	6.70899	8.93786	9.21679	8.97016	2.91786	0.041729	Up
NM_002638	Hs.112341	5266	gb:NM_002638.1 /DB_XREF=gi:4505786 /GEN=PI3 /FEA=FLmRNA /CNT=167 /TID=Hs.112341.0 /TIER=FL+Stack /STK=35 /UG=Hs.112341 /LL=5266 /DEF=Homo sapiens protease inhibitor 3, skin-derived (SKALP) (PI3), mRNA. /PROD=protease inhibitor 3, skin-derived (SKALP) /FL=gb:NM_002638.1	peptidase inhibitor 3, skin-derived	PI3	chr20q13.12	NP_002629	NM_002638	4.67678	4.82453	4.52356	6.19636	6.64929	5.65606	2.91415	0.0175438	Up
AI798655	Hs.405667	926	gb:AI798655 /DB_XREF=gi:5364127 /DB_XREF=we91a06.x1 /CLONE=IMAGE:2348434 /FEA=EST /CNT=12 /TID=Hs.2299.2 /TIER=Stack /STK=8 /UG=Hs.2299 /LL=926 /UG_GENE=CD8B1 /UG_TITLE=CD8 antigen, beta polypeptide 1 (p37)	CD8b molecule	CD8B	chr2p12	NP_001171571 /// NP_004922 /// NP_742099 /// NP_742100 /// NP_757362	NM_001178100 /// NM_004931 /// NM_172099 /// NM_172101 /// NM_172102 /// NM_172213	4.57182	4.31315	4.63082	5.59211	5.66341	6.64045	2.90322	0.0374605	Up
BC005102	Hs.642715 /// Hs.714906	84284	gb:BC005102.1 /DB_XREF=gi:13477260 /FEA=FLmRNA /CNT=83 /TID=Hs.16034.0 /TIER=FL /STK=1 /UG=Hs.16034 /DEF=Homo sapiens, Similar to RIKEN cDNA 2310079N02 gene, clone MGC:13186, mRNA, complete cds. /PROD=Similar to RIKEN cDNA 2310079N02 gene /FL=gb:BC005102.1	nucleoside-triphosphatase, cancer-related	NTPCR	chr1q42.2	NP_115700	NM_032324	5.63843	4.88134	5.98052	7.013	5.96661	7.75501	2.8626	0.019458	Up
AK092855	Hs.729282	---	gb:AK092855.1 /DB_XREF=gi:21751552 /TID=Hs2.432661.1 /CNT=9 /FEA=mRNA /TIER=ConsEnd /STK=1 /UG=Hs.432661 /UG_TITLE=Homo sapiens cDNA FLJ35536 fis, clone SPLEN2002451. /DEF=Homo sapiens cDNA FLJ35536 fis, clone SPLEN2002451.	NULL /// NULL	OTTHUMG00000171522 /// RP11-66N24.3	---	---	---	6.48793	5.17102	5.4686	7.74177	6.39091	7.54297	2.84868	0.0323139	Up
NM_004656	Hs.106674 /// Hs.622728	8314	gb:NM_004656.1 /DB_XREF=gi:4757835 /GEN=BAP1 /FEA=FLmRNA /CNT=204 /TID=Hs.106674.0 /TIER=FL+Stack /STK=90 /UG=Hs.106674 /LL=8314 /DEF=Homo sapiens BRCA1 associated protein-1 (ubiquitin carboxy-terminal hydrolase) (BAP1), mRNA. /PROD=BRCA1 associated protein-1 (ubiquitincarboxy-terminal hydrolase) /FL=gb:BC001596.1 gb:AF045581.1 gb:NM_004656.1	BRCA1 associated protein-1 (ubiquitin carboxy-terminal hydrolase)	BAP1	chr3p21.31-p21.2	NP_004647	NM_004656	4.91346	4.24213	3.79562	6.76434	5.48987	4.65693	2.84167	0.0444375	Up
AI799007	Hs.546289	6206	gb:AI799007 /DB_XREF=gi:5364479 /DB_XREF=we97d07.x1 /CLONE=IMAGE:2349037 /FEA=EST /CNT=39 /TID=Hs.285405.2 /TIER=Stack /STK=14 /UG=Hs.285405 /LL=6206 /UG_GENE=RPS12 /UG_TITLE=ribosomal protein S12	ribosomal protein S12	RPS12	chr6q23.2	NP_001007	NM_001016	9.57276	9.38998	8.30229	10.9773	10.557	10.467	2.82474	0.0344568	Up
NM_003246	Hs.164226 /// Hs.599979 /// Hs.611774 /// Hs.713837 /// Hs.732539 /// Hs.736912	7057	gb:NM_003246.1 /DB_XREF=gi:4507484 /GEN=THBS1 /FEA=FLmRNA /CNT=371 /TID=Hs.87409.0 /TIER=FL+Stack /STK=35 /UG=Hs.87409 /LL=7057 /DEF=Homo sapiens thrombospondin 1 (THBS1), mRNA. /PROD=thrombospondin 1 /FL=gb:NM_003246.1	thrombospondin 1	THBS1	chr15q15	NP_003237	NM_003246	3.61905	5.61179	3.70427	4.70297	7.29544	4.69934	2.8174	0.0284637	Up
AA514622	Hs.655217 /// Hs.712563 /// Hs.734581	9883 /// 100101267	gb:AA514622 /DB_XREF=gi:2254222 /DB_XREF=nf55c12.s1 /CLONE=IMAGE:923830 /FEA=mRNA /CNT=39 /TID=Hs.295112.4 /TIER=Stack /STK=27 /UG=Hs.295112 /LL=9883 /UG_GENE=KIAA0618 /UG_TITLE=KIAA0618 gene product	POM121 transmembrane nucleoporin /// POM121 transmembrane nucleoporin C	POM121 /// POM121C	chr7q11.2 /// chr7q11.23	NP_001092885 /// NP_001244119 /// NP_742017	NM_001099415 /// NM_001257190 /// NM_172020	4.74462	5.01311	5.3142	6.33594	6.8805	6.29233	2.80099	0.0301498	Up
AW192569	Hs.500775 /// Hs.612377 /// Hs.636112 /// Hs.658344 /// Hs.670238 /// Hs.694378 /// Hs.716993 /// Hs.743764	7756	gb:AW192569 /DB_XREF=gi:6471268 /DB_XREF=xl46g04.x1 /CLONE=IMAGE:2677782 /FEA=mRNA /CNT=29 /TID=Hs.131740.1 /TIER=ConsEnd /STK=2 /UG=Hs.131740 /UG_TITLE=Homo sapiens cDNA: FLJ22562 fis, clone HSI01814	zinc finger protein 207	ZNF207	chr17q11.2	NP_001027464 /// NP_001091977 /// NP_003448	NM_001032293 /// NM_001098507 /// NM_003457	7.42952	6.27924	6.36842	9.20718	7.60975	7.16779	2.79605	0.0440361	Up
NM_001812	Hs.479867 /// Hs.623835 /// Hs.642389	1060	gb:NM_001812.1 /DB_XREF=gi:4502778 /GEN=CENPC1 /FEA=FLmRNA /CNT=67 /TID=Hs.154207.0 /TIER=FL+Stack /STK=18 /UG=Hs.154207 /LL=1060 /DEF=Homo sapiens centromere protein C 1 (CENPC1), mRNA. /PROD=centromere protein C 1 /FL=gb:NM_001812.1 gb:M95724.1	centromere protein C 1	CENPC1	chr4q13.2	NP_001803	NM_001812	3.64849	3.16839	3.19896	5.03432	5.05427	4.24282	2.76522	0.0276931	Up
L05095	Hs.400295	6156	gb:L05095.1 /DB_XREF=gi:388034 /FEA=FLmRNA /CNT=452 /TID=Hs.111222.0 /TIER=FL+Stack /STK=204 /UG=Hs.111222 /LL=6156 /UG_GENE=RPL30 /DEF=Homo sapiens ribosomal protein L30 mRNA, complete cds. /PROD=ribosomal protein L30 /FL=gb:L05095.1 gb:NM_000989.1	ribosomal protein L30	RPL30	chr8q22	NP_000980	NM_000989	8.57181	9.06897	8.70039	9.46812	10.5985	10.4288	2.7273	0.0312878	Up
AA969958	Hs.213198 /// Hs.610343 /// Hs.629011 /// Hs.720915 /// Hs.732043	55269	gb:AA969958 /DB_XREF=gi:3145471 /DB_XREF=op60d06.s1 /CLONE=IMAGE:1581227 /FEA=FLmRNA /CNT=123 /TID=Hs.16364.0 /TIER=Stack /STK=9 /UG=Hs.16364 /LL=55269 /UG_GENE=FLJ10955 /UG_TITLE=hypothetical protein FLJ10955 /FL=gb:NM_018282.1	paraspeckle component 1	PSPC1	chr13q12.11	NP_001035879	NM_001042414 /// NR_003272 /// NR_044998	3.93501	3.08677	3.76069	5.45277	3.8395	5.4144	2.69806	0.0430164	Up
AI768144	Hs.657684	---	gb:AI768144 /DB_XREF=gi:5234653 /DB_XREF=wg81f06.x1 /CLONE=IMAGE:2371523 /FEA=EST /CNT=8 /TID=Hs.29178.0 /TIER=ConsEnd /STK=6 /UG=Hs.29178 /UG_TITLE=ESTs	---	---	---	---	---	4.40681	4.80992	3.92592	5.63978	6.49404	4.90351	2.6361	0.0243911	Up
N79662	---	2941	gb:N79662 /DB_XREF=gi:1242363 /DB_XREF=yz81f08.r1 /CLONE=IMAGE:289479 /FEA=EST /CNT=13 /TID=Hs.113517.0 /TIER=ConsEnd /STK=0 /UG=Hs.113517 /UG_TITLE=ESTs	glutathione S-transferase alpha 4	GSTA4	chr6p12.1	NP_001503	NM_001512	3.8295	3.19987	4.06411	4.91374	4.26489	5.79986	2.61828	0.027775	Up
AW069290	Hs.168799 /// Hs.665546	56339	gb:AW069290 /DB_XREF=gi:6024288 /DB_XREF=cr43g01.x1 /CLONE=HBMSC_cr43g01 /FEA=EST /CNT=25 /TID=Hs.268149.1 /TIER=Stack /STK=13 /UG=Hs.268149 /LL=56339 /UG_GENE=M6A /UG_TITLE=putative methyltransferase	methyltransferase like 3	METTL3	chr14q11.1	NP_062826	NM_019852	5.36468	4.65822	5.13468	7.07778	6.17515	5.84925	2.60869	0.0499541	Up
NM_004090	Hs.181046 /// Hs.715989	1845	gb:NM_004090.1 /DB_XREF=gi:4758207 /GEN=DUSP3 /FEA=FLmRNA /CNT=241 /TID=Hs.181046.0 /TIER=FL /STK=0 /UG=Hs.181046 /LL=1845 /DEF=Homo sapiens dual specificity phosphatase 3 (vaccinia virus phosphatase VH1-related) (DUSP3), mRNA. /PROD=dual specificity phosphatase 3 /FL=gb:BC002682.1 gb:NM_004090.1 gb:L05147.1	dual specificity phosphatase 3	DUSP3	chr17q21	NP_004081	NM_004090	4.02679	3.70786	3.57329	5.65465	4.42982	5.1527	2.60481	0.0469392	Up
AV734194	Hs.591106 /// Hs.599898 /// Hs.623476	54878	gb:AV734194 /DB_XREF=gi:10851739 /DB_XREF=AV734194 /CLONE=cdAAME10 /FEA=EST /CNT=58 /TID=Hs.319095.0 /TIER=Stack /STK=22 /UG=Hs.319095 /UG_TITLE=ESTs	dipeptidyl-peptidase 8	DPP8	chr15q22	NP_060213 /// NP_569118 /// NP_932064 /// NP_932065	NM_017743 /// NM_130434 /// NM_197960 /// NM_197961	4.46431	3.74233	3.88048	5.44855	5.49266	5.33744	2.573	0.024575	Up
AI632224	Hs.289293 /// Hs.598020 /// Hs.614387	157695	gb:AI632224 /DB_XREF=gi:4683554 /DB_XREF=tt20d08.x1 /CLONE=IMAGE:2241327 /FEA=EST /CNT=62 /TID=Hs.7110.0 /TIER=Stack /STK=21 /UG=Hs.7110 /UG_TITLE=ESTs	testis development related protein	TDRP	chr8p23.3	NP_001243042 /// NP_778250	NM_001256113 /// NM_175075	3.59607	3.58825	4.41184	5.09712	4.47581	5.91467	2.57242	0.024032	Up
CA448665	Hs.126517 /// Hs.609950 /// Hs.732565	1604	gb:CA448665 /DB_XREF=gi:24813085 /DB_XREF=UI-H-EI0-ayo-p-15-0-UI.s1 /CLONE=UI-H-EI0-ayo-p-15-0-UI /TID=Hs2.1369.3 /CNT=31 /FEA=mRNA /TIER=Stack /STK=9 /LL=1604 /UG_GENE=DAF /UG=Hs.1369 /UG_TITLE=decay accelerating factor for complement (CD55, Cromer blood group system)	CD55 molecule, decay accelerating factor for complement (Cromer blood group)	CD55	chr1q32	NP_000565 /// NP_001108224	NM_000574 /// NM_001114543 /// NM_001114544 /// NM_001114752	3.41476	4.5542	3.51312	4.16643	6.20702	4.60351	2.54836	0.0473067	Up
AF054183	Hs.10842 /// Hs.609092	5901	gb:AF054183.1 /DB_XREF=gi:4092053 /FEA=FLmRNA /CNT=483 /TID=Hs.10842.0 /TIER=FL+Stack /STK=189 /UG=Hs.10842 /LL=5901 /UG_GENE=RAN /DEF=Homo sapiens GTP binding protein mRNA, complete cds. /PROD=GTP binding protein /FL=gb:NM_006325.2 gb:BC000852.1 gb:AF052578.1 gb:M31469.1 gb:BC004272.1 gb:AF054183.1	RAN, member RAS oncogene family	RAN	chr12q24.3	NP_006316	NM_006325	5.94923	6.29207	5.18846	7.29567	7.48744	6.82482	2.54753	0.00852105	Up
BC033582	---	---	gb:BC033582.1 /DB_XREF=gi:21706790 /TID=Hs2.375085.1 /CNT=2 /FEA=FLmRNA /TIER=FL /STK=1 /UG=Hs.375085 /DEF=Homo sapiens, Similar to LOC166173, clone MGC:34832 IMAGE:5203730, mRNA, complete cds. /PROD=Similar to LOC166173 /FL=gb:BC033582.1	---	---	---	---	---	3.38723	2.68941	4.0073	5.05591	3.83451	5.18174	2.54061	0.0159341	Up
BE969671	Hs.433863	5037	gb:BE969671 /DB_XREF=gi:10582604 /DB_XREF=601679610F1 /CLONE=IMAGE:3949779 /FEA=EST /CNT=488 /TID=Hs.80423.1 /TIER=Stack /STK=11 /UG=Hs.80423 /LL=5037 /UG_GENE=PBP /UG_TITLE=prostatic binding protein	phosphatidylethanolamine binding protein 1	PEBP1	chr12q24.23	NP_002558	NM_002567	7.08735	5.04093	5.34631	8.57852	6.31242	6.14091	2.53984	0.028774	Up
NM_022129	Hs.198158	64081	gb:NM_022129.1 /DB_XREF=gi:11545856 /GEN=MAWBP /FEA=FLmRNA /CNT=43 /TID=Hs.16341.0 /TIER=FL /STK=0 /UG=Hs.16341 /LL=64081 /DEF=Homo sapiens MAWD binding protein (MAWBP), mRNA. /PROD=MAWD binding protein /FL=gb:AB049758.1 gb:NM_022129.1	phenazine biosynthesis-like protein domain containing	PBLD	chr10q21.3	NP_001028255 /// NP_071412	NM_001033083 /// NM_022129	4.24289	3.84592	3.79023	6.0149	4.68303	4.85787	2.5314	0.0488202	Up
AI351043	Hs.473819	2078	gb:AI351043 /DB_XREF=gi:4088249 /DB_XREF=qt22a08.x1 /CLONE=IMAGE:1948310 /FEA=EST /CNT=41 /TID=Hs.279477.0 /TIER=Stack /STK=20 /UG=Hs.279477 /UG_TITLE=ESTs	v-ets erythroblastosis virus E26 oncogene homolog (avian)	ERG	chr21q22.3	NP_001129626 /// NP_001129627 /// NP_001230357 /// NP_001230358 /// NP_001230361 /// NP_004440 /// NP_891548	NM_001136154 /// NM_001136155 /// NM_001243428 /// NM_001243429 /// NM_001243432 /// NM_001243433 /// NM_004449 /// NM_182918	3.85801	3.43908	3.51988	5.45168	4.12916	4.97815	2.52009	0.0472983	Up
AI820875	Hs.144980	113178 /// 113179	gb:AI820875 /DB_XREF=gi:5439954 /DB_XREF=qp39h05.x5 /CLONE=IMAGE:1925433 /FEA=EST /CNT=21 /TID=Hs.144980.0 /TIER=Stack /STK=14 /UG=Hs.144980 /UG_TITLE=ESTs, Weakly similar to CA13_HUMAN COLLAGEN ALPHA 1(III) CHAIN PRECURSOR (H.sapiens)	adenosine deaminase, tRNA-specific 3 /// secretory carrier membrane protein 4	ADAT3 /// SCAMP4	chr19p13.3	NP_524558 /// NP_612431	NM_079834 /// NM_138422	4.42758	3.81804	4.42801	5.78711	4.6182	5.99743	2.51384	0.0324588	Up
BC001622	Hs.443081 /// Hs.636282	25917	gb:BC001622.1 /DB_XREF=gi:12804432 /FEA=FLmRNA /CNT=10 /TID=Hs.30488.0 /TIER=FL /STK=0 /UG=Hs.30488 /LL=25917 /UG_GENE=DKFZP434F091 /DEF=Homo sapiens, Similar to gene trap ROSA 26 antisense, Philippe Soriano, clone MGC:930, mRNA, complete cds. /PROD=Similar to gene trap ROSA 26 antisense, PhilippeSoriano /FL=gb:BC001622.1	THUMP domain containing 3	THUMPD3	chr3p25.3	NP_001107564 /// NP_056268	NM_001114092 /// NM_015453	5.397	5.59038	5.80383	6.90083	6.32032	7.38278	2.50581	0.0426894	Up
BF223679	Hs.518089	6565	gb:BF223679 /DB_XREF=gi:11130857 /DB_XREF=7q78g05.x1 /CLONE=IMAGE:3704625 /FEA=FLmRNA /CNT=48 /TID=Hs.182575.0 /TIER=Stack /STK=8 /UG=Hs.182575 /LL=6565 /UG_GENE=SLC15A2 /UG_TITLE=solute carrier family 15 (H+peptide transporter), member 2 /FL=gb:NM_021082.1	solute carrier family 15 (H+/peptide transporter), member 2	SLC15A2	chr3q13.33	NP_001139470 /// NP_066568	NM_001145998 /// NM_021082	4.72357	5.8077	4.96453	5.89192	7.307	6.04203	2.49547	0.010377	Up
BE671045	Hs.224764 /// Hs.706380 /// Hs.743956	54675	gb:BE671045 /DB_XREF=gi:10031586 /DB_XREF=7e45c10.x1 /CLONE=IMAGE:3285426 /FEA=EST /CNT=5 /TID=Hs.150327.0 /TIER=ConsEnd /STK=5 /UG=Hs.150327 /UG_TITLE=ESTs	cardiolipin synthase 1	CRLS1	chr20p13-p12.3	NP_001120930 /// NP_061968	NM_001127458 /// NM_019095	4.26705	3.71282	5.2113	5.96824	5.34193	6.12589	2.49234	0.0300673	Up
NM_013296	Hs.584901	29899	gb:NM_013296.1 /DB_XREF=gi:9558734 /GEN=HSU54999 /FEA=FLmRNA /CNT=39 /TID=Hs.278338.0 /TIER=FL /STK=0 /UG=Hs.278338 /LL=29899 /DEF=Homo sapiens LGN protein (HSU54999), mRNA. /PROD=LGN protein /FL=gb:U54999.1 gb:NM_013296.1	G-protein signaling modulator 2	GPSM2	chr1p13.3	NP_037428	NM_013296	5.38128	5.83432	5.83257	6.03923	7.40418	7.2329	2.47603	0.0496542	Up
NM_015859	Hs.592334	2957	gb:NM_015859.1 /DB_XREF=gi:7706734 /GEN=GTF2A1 /FEA=FLmRNA /CNT=12 /TID=Hs.121686.0 /TIER=FL /STK=0 /UG=Hs.121686 /LL=2957 /DEF=Homo sapiens general transcription factor IIA, 1 (37kD and 19kD subunits) (GTF2A1), mRNA. /PROD=TFIIA alpha, p55 /FL=gb:D14887.1 gb:NM_015859.1	general transcription factor IIA, 1, 19/37kDa	GTF2A1	chr14q31.1	NP_056943 /// NP_963889	NM_015859 /// NM_201595 /// NR_048573	6.57103	5.72995	6.19196	7.56999	7.06454	7.79826	2.46979	0.0174223	Up
NM_018985	Hs.660431	54435	gb:NM_018985.1 /DB_XREF=gi:9506770 /GEN=HCGIV.9 /FEA=FLmRNA /CNT=11 /TID=Hs.60856.0 /TIER=FL /STK=3 /UG=Hs.60856 /LL=54435 /DEF=Homo sapiens hypothetical protein (HCGIV.9), mRNA. /PROD=hypothetical protein /FL=gb:NM_018985.1	HLA complex group 4 (non-protein coding)	HCG4	chr6p21.3	---	NR_002139	3.12223	2.84407	3.22578	4.13547	3.9198	4.88629	2.46741	0.0261403	Up
NM_002610	Hs.470633	5163	gb:NM_002610.2 /DB_XREF=gi:7108358 /GEN=PDK1 /FEA=FLmRNA /CNT=9 /TID=Hs.61712.0 /TIER=FL /STK=2 /UG=Hs.61712 /LL=5163 /DEF=Homo sapiens pyruvate dehydrogenase kinase, isoenzyme 1 (PDK1), nuclear gene encoding mitochondrial protein, mRNA. /PROD=pyruvate dehydrogenase kinase, isoenzyme 1 /FL=gb:NM_002610.2 gb:L42450.1	pyruvate dehydrogenase kinase, isozyme 1	PDK1	chr2q31.1	NP_002601	NM_002610	5.4575	6.5734	5.74677	6.88972	7.61137	7.32047	2.45742	0.0138467	Up
D25547	Hs.279257 /// Hs.714086	5110	gb:D25547.1 /DB_XREF=gi:1332402 /FEA=FLmRNA /CNT=16 /TID=Hs.79137.1 /TIER=FL+Stack /STK=11 /UG=Hs.79137 /LL=5110 /UG_GENE=PCMT1 /DEF=Homo sapiens mRNA for PIMT isozyme I, complete cds. /PROD=PIMT isozyme I /FL=gb:D25547.1	protein-L-isoaspartate (D-aspartate) O-methyltransferase	PCMT1	chr6q24-q25	NP_001238978 /// NP_001238979 /// NP_001238980 /// NP_001238981 /// NP_001238982 /// NP_005380	NM_001252049 /// NM_001252050 /// NM_001252051 /// NM_001252052 /// NM_001252053 /// NM_005389	4.20482	4.32703	4.23177	5.822	5.22885	5.5295	2.44785	0.0254423	Up
NM_014792	Hs.649259	9834	gb:NM_014792.1 /DB_XREF=gi:7661923 /GEN=KIAA0125 /FEA=FLmRNA /CNT=17 /TID=Hs.38365.0 /TIER=FL /STK=5 /UG=Hs.38365 /LL=9834 /DEF=Homo sapiens KIAA0125 gene product (KIAA0125), mRNA. /PROD=KIAA0125 gene product /FL=gb:D50915.1 gb:NM_014792.1	KIAA0125	KIAA0125	chr14q32.33	---	NM_014151 /// NM_014792 /// NR_026800	2.97688	5.63555	2.95289	4.22685	6.99987	3.57906	2.4287	0.0422578	Up
AK024960	Hs.287659 /// Hs.694157 /// Hs.721568	55342	gb:AK024960.1 /DB_XREF=gi:10437385 /FEA=mRNA /CNT=4 /TID=Hs.287659.0 /TIER=ConsEnd /STK=1 /UG=Hs.287659 /UG_TITLE=Homo sapiens cDNA: FLJ21307 fis, clone COL02129 /DEF=Homo sapiens cDNA: FLJ21307 fis, clone COL02129.	spermatid perinuclear RNA binding protein	STRBP	chr9q33.3	NP_001164608 /// NP_060857	NM_001171137 /// NM_018387 /// NR_033234	4.21707	5.78274	3.97181	5.978	6.85744	5.24639	2.42831	0.021413	Up
BE328720	---	---	gb:BE328720 /DB_XREF=gi:9202496 /DB_XREF=ht03g04.x1 /CLONE=IMAGE:3145686 /FEA=EST /CNT=5 /TID=Hs.280651.0 /TIER=ConsEnd /STK=4 /UG=Hs.280651 /UG_TITLE=ESTs	NULL	INIP	---	---	---	4.79077	4.78202	4.41158	6.09705	5.68984	6.03562	2.42789	0.0252384	Up
AV721430	Hs.593995 /// Hs.613812 /// Hs.706243	6934	gb:AV721430 /DB_XREF=gi:10818582 /DB_XREF=AV721430 /CLONE=HTBBIF09 /FEA=DNA_5 /CNT=2 /TID=Hs.173638.2 /TIER=ConsEnd /STK=0 /UG=Hs.173638 /LL=6934 /UG_GENE=TCF7L2 /UG_TITLE=transcription factor 7-like 2 (T-cell specific, HMG-box)	transcription factor 7-like 2 (T-cell specific, HMG-box)	TCF7L2	chr10q25.3	NP_001139746 /// NP_001139755 /// NP_001139756 /// NP_001139757 /// NP_001139758 /// NP_001185454 /// NP_001185455 /// NP_001185456 /// NP_001185457 /// NP_001185458 /// NP_001185459 /// NP_001185460 /// NP_110383	NM_001146274 /// NM_001146283 /// NM_001146284 /// NM_001146285 /// NM_001146286 /// NM_001198525 /// NM_001198526 /// NM_001198527 /// NM_001198528 /// NM_001198529 /// NM_001198530 /// NM_001198531 /// NM_030756	5.86614	3.85203	4.55927	7.31809	5.04156	5.3578	2.42374	0.0263317	Up
NM_002539	Hs.467701 /// Hs.678417	4953	gb:NM_002539.1 /DB_XREF=gi:4505488 /GEN=ODC1 /FEA=FLmRNA /CNT=464 /TID=Hs.75212.0 /TIER=FL+Stack /STK=132 /UG=Hs.75212 /LL=4953 /DEF=Homo sapiens ornithine decarboxylase 1 (ODC1) mRNA. /PROD=ornithine decarboxylase 1 /FL=gb:NM_002539.1 gb:M16650.1	ornithine decarboxylase 1	ODC1	chr2p25	NP_002530	NM_002539	4.95298	6.72419	6.41025	5.77405	7.92058	7.89959	2.41622	0.0262991	Up
BF129779	Hs.655055	90196	gb:BF129779 /DB_XREF=gi:10968819 /DB_XREF=601810896R1 /CLONE=IMAGE:4054126 /FEA=EST /CNT=13 /TID=Hs.318469.0 /TIER=ConsEnd /STK=3 /UG=Hs.318469 /UG_TITLE=ESTs, Highly similar to clg01 (H.sapiens)	SYS1 Golgi-localized integral membrane protein homolog (S. cerevisiae)	SYS1	chr20q13.12	NP_001093261 /// NP_001184058 /// NP_291020	NM_001099791 /// NM_001197129 /// NM_033542	3.75274	4.66665	4.20634	4.76368	6.21941	5.20282	2.41563	0.0229796	Up
AL049397	Hs.498317 /// Hs.617824 /// Hs.618993 /// Hs.712870	51029	gb:AL049397.1 /DB_XREF=gi:4500188 /FEA=mRNA /CNT=162 /TID=Hs.12314.0 /TIER=Stack /STK=84 /UG=Hs.12314 /UG_TITLE=Homo sapiens mRNA; cDNA DKFZp586C1019 (from clone DKFZp586C1019) /DEF=Homo sapiens mRNA; cDNA DKFZp586C1019 (from clone DKFZp586C1019).	desumoylating isopeptidase 2	DESI2	chr1q44	NP_057160	NM_016076	3.66945	5.92839	4.70585	4.60684	7.02635	6.42855	2.41534	0.0346732	Up
NM_016823	Hs.461896 /// Hs.621952	1398	gb:NM_016823.1 /DB_XREF=gi:8400705 /GEN=CRK /FEA=FLmRNA /CNT=162 /TID=Hs.306088.0 /TIER=FL /STK=0 /UG=Hs.306088 /LL=1398 /DEF=Homo sapiens v-crk avian sarcoma virus CT10 oncogene homolog (CRK), transcript variant II, mRNA. /PROD=v-crk avian sarcoma virus CT10 oncogene homologisoform a /FL=gb:D10656.1 gb:NM_016823.1	v-crk sarcoma virus CT10 oncogene homolog (avian)	CRK	chr17p13.3	NP_005197 /// NP_058431	NM_005206 /// NM_016823	4.45787	4.65771	4.79701	5.83954	5.40567	6.34513	2.41212	0.0373369	Up
AA699583	Hs.744913	10097	gb:AA699583 /DB_XREF=gi:2703730 /DB_XREF=zi42g07.s1 /CLONE=IMAGE:433500 /FEA=FLmRNA /CNT=473 /TID=Hs.42915.0 /TIER=Stack /STK=9 /UG=Hs.42915 /LL=10097 /UG_GENE=ACTR2 /UG_TITLE=ARP2 (actin-related protein 2, yeast) homolog /FL=gb:AF006082.1 gb:NM_005722.1	ARP2 actin-related protein 2 homolog (yeast)	ACTR2	chr2p14	NP_001005386 /// NP_005713	NM_001005386 /// NM_005722	7.22124	7.28309	7.27032	8.47785	8.34249	8.72494	2.40397	0.0081394	Up
AF116674	Hs.336994 /// Hs.595842 /// Hs.670646	9788	gb:AF116674.1 /DB_XREF=gi:7959846 /FEA=FLmRNA /CNT=8 /TID=Hs.77694.1 /TIER=FL /STK=0 /UG=Hs.77694 /LL=9788 /UG_GENE=KIAA0429 /DEF=Homo sapiens PRO1941 mRNA, complete cds. /PROD=PRO1941 /FL=gb:AF116674.1	metastasis suppressor 1	MTSS1	chr8p22	NP_055566	NM_014751	4.69992	3.23349	5.93119	5.42938	4.5884	7.36146	2.40206	0.0341161	Up
AK026286	Hs.677373	---	gb:AK026286.1 /DB_XREF=gi:10439097 /FEA=mRNA /CNT=3 /TID=Hs.306837.0 /TIER=ConsEnd /STK=0 /UG=Hs.306837 /UG_TITLE=Homo sapiens cDNA: FLJ22633 fis, clone HSI06502 /DEF=Homo sapiens cDNA: FLJ22633 fis, clone HSI06502.	---	---	---	---	---	2.95515	2.90858	3.28763	4.21191	4.60887	4.09941	2.40017	0.0392471	Up
AW052216	---	---	gb:AW052216 /DB_XREF=gi:5914575 /DB_XREF=wy87d11.x1 /CLONE=IMAGE:2555541 /FEA=EST /CNT=6 /TID=Hs.136338.0 /TIER=ConsEnd /STK=6 /UG=Hs.136338 /UG_TITLE=ESTs	---	---	---	---	---	2.91898	2.98172	2.71838	4.28571	3.72665	4.32161	2.39243	0.0401693	Up
AU122258	Hs.736044	---	gb:AU122258 /DB_XREF=gi:10937493 /DB_XREF=AU122258 /CLONE=MAMMA1002009 /TID=Hs2.406837.1 /CNT=3 /FEA=mRNA /TIER=ConsEnd /STK=0 /UG=Hs.406837 /UG_TITLE=Homo sapiens cDNA FLJ14121 fis, clone MAMMA1002009.	---	---	---	---	---	2.48443	2.48378	2.57776	3.85398	3.83848	3.61056	2.38813	0.00760694	Up
T71491	Hs.606282 /// Hs.613143 /// Hs.658922 /// Hs.735126 /// Hs.737326 /// Hs.741833	124540	gb:T71491 /DB_XREF=gi:686012 /DB_XREF=yd35g07.r1 /CLONE=IMAGE:110268 /FEA=EST /CNT=114 /TID=Hs.42179.0 /TIER=ConsEnd /STK=0 /UG=Hs.42179 /LL=27154 /UG_GENE=BRPF3 /UG_TITLE=bromodomain and PHD finger containing, 3	musashi RNA-binding protein 2	MSI2	chr17q22	NP_620412 /// NP_733839	NM_138962 /// NM_170721	4.66996	5.35947	4.63408	5.57427	6.50474	6.30365	2.38057	0.0316365	Up
AK026691	Hs.561455 /// Hs.561539 /// Hs.744093	375513	gb:AK026691.1 /DB_XREF=gi:10439600 /FEA=mRNA /CNT=11 /TID=Hs.186180.0 /TIER=ConsEnd /STK=0 /UG=Hs.186180 /UG_TITLE=Homo sapiens cDNA: FLJ23038 fis, clone LNG02039 /DEF=Homo sapiens cDNA: FLJ23038 fis, clone LNG02039.	glucuronidase, beta pseudogene 4	GUSBP4	chr6p11.2	---	NM_206908 /// NM_206910 /// NM_206911 /// NM_206912 /// NR_003660	4.63195	4.22446	5.44252	5.56679	5.40611	6.85069	2.3595	0.013265	Up
D28364	Hs.511605	302	gb:D28364.1 /DB_XREF=gi:461163 /TID=Hs2.435459.1 /CNT=1 /FEA=mRNA /TIER=ConsEnd /STK=0 /UG=Hs.435459 /UG_TITLE=Human mRNA for annexin II, 5UTR (sequence from the 5cap to the start codon). /DEF=Human mRNA for annexin II, 5UTR (sequence from the 5cap to the start codon).	annexin A2	ANXA2	chr15q22.2	NP_001002857 /// NP_001002858 /// NP_001129487 /// NP_004030	NM_001002857 /// NM_001002858 /// NM_001136015 /// NM_004039	4.31804	4.22898	3.80385	5.48926	5.329	5.2821	2.35504	0.00851101	Up
NM_001150	Hs.1239	290	gb:NM_001150.1 /DB_XREF=gi:4502094 /GEN=ANPEP /FEA=FLmRNA /CNT=167 /TID=Hs.1239.0 /TIER=FL+Stack /STK=80 /UG=Hs.1239 /LL=290 /DEF=Homo sapiens alanyl (membrane) aminopeptidase (aminopeptidase N, aminopeptidase M, microsomal aminopeptidase, CD13, p150) (ANPEP), mRNA. /PROD=membrane alanine aminopeptidase precursor /FL=gb:M22324.1 gb:NM_001150.1	alanyl (membrane) aminopeptidase	ANPEP	chr15q25-q26	NP_001141	NM_001150	7.48177	7.62683	6.81429	8.24935	8.86226	8.56527	2.34891	0.0478427	Up
AF074723	Hs.497353	10001	gb:AF074723.1 /DB_XREF=gi:3329505 /GEN=MED6 /FEA=FLmRNA /CNT=21 /TID=Hs.167738.1 /TIER=FL /STK=0 /UG=Hs.167738 /LL=10001 /DEF=Homo sapiens RNA polymerase transcriptional regulation mediator (MED6) mRNA, complete cds. /PROD=RNA polymerase transcriptional regulationmediator /FL=gb:AF074723.1 gb:BC004106.1	mediator complex subunit 6	MED6	chr14q24.2	NP_005457	NM_005466	3.22231	4.55879	3.25759	4.31315	5.74733	4.6996	2.34501	0.00704176	Up
AW024383	Hs.190968 /// Hs.605433	6227	gb:AW024383 /DB_XREF=gi:5877913 /DB_XREF=wv03e06.x1 /CLONE=IMAGE:2528482 /FEA=EST /CNT=16 /TID=Hs.1948.1 /TIER=Stack /STK=8 /UG=Hs.1948 /LL=6227 /UG_GENE=RPS21 /UG_TITLE=ribosomal protein S21	ribosomal protein S21	RPS21	chr20q13.3	NP_001015	NM_001024	7.74045	7.84906	8.43818	9.48589	8.98135	9.305	2.34431	0.0408059	Up
H96715	Hs.168241 /// Hs.602795 /// Hs.623758	55102	gb:H96715 /DB_XREF=gi:1110201 /DB_XREF=yw08b10.s1 /CLONE=IMAGE:251611 /FEA=FLmRNA /CNT=50 /TID=Hs.168241.0 /TIER=Stack /STK=8 /UG=Hs.168241 /LL=55102 /UG_GENE=FLJ10242 /UG_TITLE=hypothetical protein FLJ10242 /FL=gb:NM_018036.1	autophagy related 2B	ATG2B	chr14q32.2	NP_060506	NM_018036	4.89901	3.86683	4.06915	6.36579	4.8985	4.9566	2.34184	0.0229854	Up
R17746	Hs.658071	---	gb:R17746 /DB_XREF=gi:771356 /DB_XREF=yf49b10.s1 /CLONE=IMAGE:25395 /FEA=EST /CNT=5 /TID=Hs.84469.0 /TIER=ConsEnd /STK=4 /UG=Hs.84469 /UG_TITLE=ESTs	---	---	---	---	---	2.96473	3.35615	3.3402	4.07337	4.99393	4.10826	2.34069	0.04362	Up
L22453	Hs.119598	6122 /// 116936 /// 116938	gb:L22453.1 /DB_XREF=gi:347963 /GEN=TARBP-b /FEA=FLmRNA /CNT=1 /TID=HsAffx.900448.689 /TIER=FL /STK=0 /DEF=Homo sapiens HIV-1 TAR RNA binding protein (TARBP-b) mRNA, complete cds. /FL=gb:L22453.1	RNA, U86 small nucleolar /// ribosomal protein L3 /// small nucleolar RNA, C/D box 83B	RNU86 /// RPL3 /// SNORD83B	chr22q13	NP_000958 /// NP_001029025	NM_000967 /// NM_001033853 /// NR_000026 /// NR_000028	8.66686	8.02097	7.28007	9.82588	9.1472	8.79456	2.33522	0.00949597	Up
NM_002358	Hs.591697	4085	gb:NM_002358.2 /DB_XREF=gi:6466452 /GEN=MAD2L1 /FEA=FLmRNA /CNT=140 /TID=Hs.79078.0 /TIER=FL+Stack /STK=29 /UG=Hs.79078 /LL=4085 /DEF=Homo sapiens MAD2 (mitotic arrest deficient, yeast, homolog)-like 1 (MAD2L1), mRNA. /PROD=MAD2-like 1 /FL=gb:U31278.1 gb:NM_002358.2 gb:U65410.1 gb:BC000356.1	MAD2 mitotic arrest deficient-like 1 (yeast)	MAD2L1	chr4q27	NP_002349	NM_002358	3.30343	3.64632	4.32639	4.32834	4.66772	5.74446	2.33459	0.0127467	Up
AF217988	Hs.435302 /// Hs.636287 /// Hs.696997	7551	gb:AF217988.1 /DB_XREF=gi:10441906 /FEA=mRNA /CNT=7 /TID=Hs.20082.1 /TIER=ConsEnd /STK=0 /UG=Hs.20082 /LL=7551 /UG_GENE=ZNF3 /DEF=Homo sapiens clone PP1650 unknown mRNA. /PROD=unknown	zinc finger protein 3	ZNF3	chr7q22.1	NP_001265213 /// NP_001265216 /// NP_001265219 /// NP_001265220 /// NP_001265221 /// NP_060185 /// NP_116313	NM_001278284 /// NM_001278287 /// NM_001278290 /// NM_001278291 /// NM_001278292 /// NM_017715 /// NM_032924	3.5909	3.87336	3.18189	4.67308	5.18421	4.42064	2.32774	0.00309424	Up
BE397715	Hs.509545 /// Hs.739991 /// Hs.742153	5089	gb:BE397715 /DB_XREF=gi:9343080 /DB_XREF=601289842F1 /CLONE=IMAGE:3620290 /FEA=FLmRNA /CNT=122 /TID=Hs.93728.0 /TIER=Stack /STK=10 /UG=Hs.93728 /LL=5089 /UG_GENE=PBX2 /UG_TITLE=pre-B-cell leukemia transcription factor 2 /FL=gb:NM_002586.1	pre-B-cell leukemia homeobox 2	PBX2	chr6p21.3	NP_002577	NM_002586	4.67261	4.07695	4.11887	5.65272	5.25989	5.6523	2.32483	0.0167718	Up
U64675	Hs.469630 /// Hs.535589 /// Hs.645445 /// Hs.652697 /// Hs.666924 /// Hs.687703 /// Hs.697403 /// Hs.720366 /// Hs.726367 /// Hs.736851	84220 /// 285190 /// 653489 /// 727851 /// 729540	gb:U64675.2 /DB_XREF=gi:5809677 /FEA=FLmRNA /CNT=3 /TID=Hs.199179.2 /TIER=FL /STK=0 /UG=Hs.199179 /LL=5903 /UG_GENE=RANBP2 /DEF=Homo sapiens sperm membrane protein BS-63 mRNA, complete cds. /PROD=sperm membrane protein BS-63 /FL=gb:U64675.2	RANBP2-like and GRIP domain containing 3 /// RANBP2-like and GRIP domain containing 4 /// RANBP2-like and GRIP domain containing 5 /// RANBP2-like and GRIP domain containing 6 /// RANBP2-like and GRIP domain containing 8	RGPD3 /// RGPD4 /// RGPD5 /// RGPD6 /// RGPD8	chr2q12.3 /// chr2q13	NP_001032955 /// NP_001116835 /// NP_001137485 /// NP_001157935 /// NP_005045 /// NP_115636 /// NP_872394	NM_001037866 /// NM_001123363 /// NM_001144013 /// NM_001164463 /// NM_005054 /// NM_032260 /// NM_182588	5.92156	4.69532	7.32722	7.54162	5.93889	8.34686	2.31979	0.0178273	Up
AW337510	---	1327	gb:AW337510 /DB_XREF=gi:6834136 /DB_XREF=xx58e02.x1 /CLONE=IMAGE:2847866 /FEA=mRNA /CNT=21 /TID=Hs.113205.1 /TIER=Stack /STK=10 /UG=Hs.113205 /LL=1327 /UG_GENE=COX4 /UG_TITLE=cytochrome c oxidase subunit IV	cytochrome c oxidase subunit IV isoform 1	COX4I1	chr16q24.1	NP_001852	NM_001861	4.30859	4.23181	4.37274	5.07568	5.90903	5.44277	2.31462	0.0484177	Up
AK021688	Hs.436034 /// Hs.510927 /// Hs.655217	155400 /// 260294	gb:AK021688.1 /DB_XREF=gi:10432923 /FEA=mRNA /CNT=28 /TID=Hs.295112.2 /TIER=Stack /STK=24 /UG=Hs.295112 /LL=9883 /UG_GENE=KIAA0618 /UG_TITLE=KIAA0618 gene product /DEF=Homo sapiens cDNA FLJ11626 fis, clone HEMBA1004203, weakly similar to NUCLEOLAR PROTEIN NOP2.	NOP2/Sun domain family, member 5 pseudogene 1 /// NOP2/Sun domain family, member 5 pseudogene 2	NSUN5P1 /// NSUN5P2	chr7q11.23	---	NM_001039487 /// NM_001039575 /// NM_001039576 /// NM_032158 /// NM_145645 /// NM_148936 /// NM_148980 /// NR_033322 /// NR_033323	6.04599	6.12527	5.77536	7.59423	6.95419	6.93229	2.30457	0.0297665	Up
BG028213	Hs.288224 /// Hs.713644	54534	gb:BG028213 /DB_XREF=gi:12417307 /DB_XREF=602295635F1 /CLONE=IMAGE:4390257 /FEA=mRNA /CNT=128 /TID=Hs.288224.1 /TIER=Stack /STK=27 /UG=Hs.288224 /LL=54534 /UG_GENE=FLJ20493 /UG_TITLE=hypothetical protein	mitochondrial ribosomal protein L50	MRPL50	chr9q31.1	NP_061924	NM_019051	3.62896	4.31614	4.91245	4.3435	5.33396	6.37168	2.2985	0.038906	Up
AB050468	Hs.518055	26018	gb:AB050468.1 /DB_XREF=gi:13537354 /GEN=lig-1 /FEA=FLmRNA /CNT=1 /TID=HsAffx.900305.769 /TIER=FL /STK=0 /DEF=Homo sapiens mRNA for membrane glycoprotein LIG-1, complete cds. /PROD=membrane glycoprotein LIG-1 /FL=gb:AB050468.1	leucine-rich repeats and immunoglobulin-like domains 1	LRIG1	chr3p14	NP_056356	NM_015541	4.84637	4.04113	4.70351	6.1512	5.15585	5.83209	2.29626	0.00266597	Up
NM_019048	Hs.101364 /// Hs.594874 /// Hs.619073	54529	gb:NM_019048.1 /DB_XREF=gi:9506696 /GEN=FLJ20752 /FEA=FLmRNA /CNT=157 /TID=Hs.101364.0 /TIER=FL+Stack /STK=42 /UG=Hs.101364 /LL=54529 /DEF=Homo sapiens hypothetical protein (FLJ20752), mRNA. /PROD=hypothetical protein /FL=gb:BC001243.1 gb:NM_019048.1	asparagine synthetase domain containing 1	ASNSD1	chr2p24.3-q21.3	NP_061921	NM_019048	3.46196	3.62176	4.16052	4.78153	5.24718	4.85613	2.2917	0.0472566	Up
AA156022	Hs.524121	54538	gb:AA156022 /DB_XREF=gi:1727647 /DB_XREF=zo48c05.s1 /CLONE=IMAGE:590120 /FEA=mRNA /CNT=57 /TID=Hs.111518.1 /TIER=Stack /STK=20 /UG=Hs.111518 /LL=54538 /UG_GENE=FLJ20798 /UG_TITLE=hypothetical protein	roundabout, axon guidance receptor, homolog 4 (Drosophila)	ROBO4	chr11q24.2	NP_061928	NM_019055	4.74019	5.48875	5.42134	6.29063	6.23846	6.75659	2.28779	0.0368401	Up
NM_024341	Hs.250821 /// Hs.591380 /// Hs.608371	79230	gb:NM_024341.1 /DB_XREF=gi:13236592 /GEN=MGC4054 /FEA=FLmRNA /CNT=8 /TID=Hs.250821.0 /TIER=FL /STK=0 /UG=Hs.250821 /LL=79230 /DEF=Homo sapiens hypothetical protein MGC4054 (MGC4054), mRNA. /PROD=hypothetical protein MGC4054 /FL=gb:NM_024341.1 gb:BC003020.1	zinc finger protein 557	ZNF557	chr19p13.2	NP_001037852 /// NP_001037853 /// NP_077317	NM_001044387 /// NM_001044388 /// NM_024341	4.92863	4.86981	4.90222	6.48675	5.66861	6.00559	2.28574	0.0346934	Up
W72527	Hs.654352	6509	gb:W72527 /DB_XREF=gi:1382184 /DB_XREF=zd63a09.s1 /CLONE=IMAGE:345304 /FEA=EST /CNT=108 /TID=Hs.286049.2 /TIER=Stack /STK=29 /UG=Hs.286049 /LL=29968 /UG_GENE=PSA /UG_TITLE=phosphoserine aminotransferase	solute carrier family 1 (glutamate/neutral amino acid transporter), member 4	SLC1A4	chr2p15-p13	NP_001180422 /// NP_003029	NM_001135581 /// NM_001193493 /// NM_003038	4.4612	4.36295	5.41391	5.11829	5.45334	6.84802	2.27308	0.0421141	Up
NM_130387	Hs.665154 /// Hs.740755	142686	gb:NM_130387.4 /DB_XREF=gi:28559001 /GEN=ASB14 /TID=Hs2.381357.1 /CNT=2 /FEA=FLmRNA /TIER=FL /STK=1 /LL=142686 /UG=Hs.381357 /DEF=Homo sapiens ankyrin repeat and SOCS box-containing 14 (ASB14), mRNA. /PROD=ankyrin repeat and SOCS box-containing protein14 /FL=gb:NM_130387.4 gb:AF403032.1	ankyrin repeat and SOCS box containing 14	ASB14	chr3p21.1	NP_001136205 /// NP_569058	NM_001142733 /// NM_130387	4.19922	4.33753	3.6556	4.96049	5.65669	5.11161	2.26917	0.0309857	Up
AI221318	Hs.24763	5902	gb:AI221318 /DB_XREF=gi:3803521 /DB_XREF=qg74h09.x1 /CLONE=IMAGE:1840961 /FEA=EST /CNT=73 /TID=Hs.24763.1 /TIER=Stack /STK=15 /UG=Hs.24763 /LL=5902 /UG_GENE=RANBP1 /UG_TITLE=RAN binding protein 1	RAN binding protein 1	RANBP1	chr22q11.21	NP_002873	NM_002882	4.8459	5.01115	5.82732	5.66875	5.96509	7.2535	2.25772	0.0282076	Up
NM_016593	Hs.387367	51302	gb:NM_016593.1 /DB_XREF=gi:7706128 /GEN=CYP39A1 /FEA=FLmRNA /CNT=10 /TID=Hs.20766.0 /TIER=FL /STK=1 /UG=Hs.20766 /LL=51302 /DEF=Homo sapiens oxysterol 7alpha-hydroxylase (CYP39A1), mRNA. /PROD=oxysterol 7alpha-hydroxylase /FL=gb:NM_016593.1 gb:AF237982.1	cytochrome P450, family 39, subfamily A, polypeptide 1	CYP39A1	chr6p21.1-p11.2	NP_057677	NM_016593	2.85376	2.42651	3.03059	4.24435	3.10723	4.27319	2.25768	0.0362431	Up
BC001252	Hs.162996 /// Hs.712287	54808	gb:BC001252.1 /DB_XREF=gi:12654818 /FEA=FLmRNA /CNT=109 /TID=Hs.14328.1 /TIER=FL+Stack /STK=37 /UG=Hs.14328 /LL=54808 /UG_GENE=FLJ20071 /DEF=Homo sapiens, Similar to hypothetical protein FLJ20071, clone MGC:4975, mRNA, complete cds. /PROD=Similar to hypothetical protein FLJ20071 /FL=gb:BC001252.1	dymeclin	DYM	chr18q21.1	NP_060123	NM_017653	3.76075	4.06641	3.64988	5.29256	4.90046	4.78364	2.25389	0.0287258	Up
AU144912	Hs.160562 /// Hs.604258 /// Hs.624759 /// Hs.708628	3479	gb:AU144912 /DB_XREF=gi:11006433 /DB_XREF=AU144912 /CLONE=HEMBA1003364 /FEA=FLmRNA /CNT=114 /TID=Hs.85112.0 /TIER=Stack /STK=15 /UG=Hs.85112 /LL=3479 /UG_GENE=IGF1 /UG_TITLE=insulin-like growth factor 1 (somatomedin C) /FL=gb:X00173.1 gb:M27544.1 gb:M29644.1 gb:NM_000618.1	insulin-like growth factor 1 (somatomedin C)	IGF1	chr12q23.2	NP_000609 /// NP_001104753 /// NP_001104754 /// NP_001104755	NM_000618 /// NM_001111283 /// NM_001111284 /// NM_001111285	3.98053	4.58536	4.0615	5.02344	5.5597	5.5682	2.25064	0.0196655	Up
AI375915	Hs.731555	100507463	gb:AI375915 /DB_XREF=gi:4175905 /DB_XREF=tc14c11.x1 /CLONE=IMAGE:2063828 /TID=Hs2.436555.1 /CNT=41 /FEA=mRNA /TIER=Stack /STK=16 /UG=Hs.436555 /UG_TITLE=Homo sapiens cDNA FLJ36661 fis, clone UTERU2002736.	uncharacterized LOC100507463	LOC100507463	---	---	NR_037173 /// NR_037174 /// NR_037175 /// NR_037176	3.60213	6.28804	5.6078	5.02473	7.56074	6.51387	2.24908	0.0159445	Up
AW006067	Hs.546479	653121	gb:AW006067 /DB_XREF=gi:5854845 /DB_XREF=wz92a02.x1 /CLONE=IMAGE:2566250 /FEA=EST /CNT=16 /TID=Hs.129837.0 /TIER=ConsEnd /STK=5 /UG=Hs.129837 /UG_TITLE=ESTs, Weakly similar to Z263_HUMAN ZINC FINGER PROTEIN 263 (H.sapiens)	zinc finger and BTB domain containing 8A	ZBTB8A	chr1p35.1	NP_001035531	NM_001040441 /// NM_144621	3.4309	2.75705	3.89645	4.96007	4.13658	4.59627	2.24758	0.042184	Up
AI683900	Hs.527861	10956	gb:AI683900 /DB_XREF=gi:4894082 /DB_XREF=tw54e04.x1 /CLONE=IMAGE:2263518 /FEA=mRNA /CNT=8 /TID=Hs.76228.2 /TIER=ConsEnd /STK=1 /UG=Hs.76228 /LL=10956 /UG_GENE=OS-9 /UG_TITLE=amplified in osteosarcoma	osteosarcoma amplified 9, endoplasmic reticulum lectin	OS9	chr12q13	NP_001017956 /// NP_001017957 /// NP_001017958 /// NP_001248349 /// NP_001248350 /// NP_001248351 /// NP_001248352 /// NP_006803	NM_001017956 /// NM_001017957 /// NM_001017958 /// NM_001261420 /// NM_001261421 /// NM_001261422 /// NM_001261423 /// NM_006812	5.99629	6.24513	5.81415	7.42837	7.51112	6.41151	2.2444	0.0499273	Up
BE891920	Hs.323342 /// Hs.680937	10093	gb:BE891920 /DB_XREF=gi:10351728 /DB_XREF=601435490F1 /CLONE=IMAGE:3920590 /FEA=FLmRNA /CNT=208 /TID=Hs.323342.0 /TIER=Stack /STK=59 /UG=Hs.323342 /LL=10093 /UG_GENE=ARPC4 /UG_TITLE=actin related protein 23 complex, subunit 4 (20 kD) /FL=gb:AF006087.1 gb:NM_005718.1	actin related protein 2/3 complex, subunit 4, 20kDa	ARPC4	chr3p25.3	NP_001020130 /// NP_001020131 /// NP_001185709 /// NP_005709	NM_001024959 /// NM_001024960 /// NM_001198780 /// NM_005718	5.64358	4.85762	4.96053	7.1147	5.7705	5.75187	2.24362	0.0369471	Up
AF081459	Hs.432948	5001	gb:AF081459.1 /DB_XREF=gi:3766213 /GEN=ORC5L /FEA=FLmRNA /CNT=2 /TID=Hs.153138.1 /TIER=FL /STK=0 /UG=Hs.153138 /LL=5001 /DEF=Homo sapiens origin recognition complex subunit ORC5T (ORC5L) mRNA, alternatively spliced product, complete cds. /PROD=origin recognition complex subunit ORC5T /FL=gb:AF081459.1	origin recognition complex, subunit 5	ORC5	chr7q22.1	NP_002544 /// NP_859531	NM_001197292 /// NM_002553 /// NM_181747	3.23452	2.72726	2.61001	4.27376	4.2902	3.42529	2.24268	0.0358016	Up
AL136729	Hs.553723 /// Hs.741120	63891	gb:AL136729.1 /DB_XREF=gi:12052976 /GEN=DKFZp434A0610 /FEA=FLmRNA /CNT=1 /TID=Hs.16036.1 /TIER=FL /STK=0 /UG=Hs.16036 /LL=63891 /DEF=Homo sapiens mRNA; cDNA DKFZp434A0610 (from clone DKFZp434A0610); complete cds. /PROD=hypothetical protein /FL=gb:AL136729.1	ring finger protein 123	RNF123	chr3p24.3	NP_071347	NM_022064	5.82014	7.20361	6.23746	6.71934	8.31025	7.66652	2.24076	0.0176478	Up
H75391	Hs.658754	---	gb:H75391 /DB_XREF=gi:1049598 /DB_XREF=yr77b03.r1 /CLONE=IMAGE:211277 /TID=Hs2.407089.1 /CNT=6 /FEA=mRNA /TIER=ConsEnd /STK=0 /UG=Hs.407089 /UG_TITLE=Homo sapiens cDNA FLJ33748 fis, clone BRCAN2000148.	---	---	---	---	---	5.06106	4.27523	5.45071	6.38274	5.79355	6.26505	2.23689	0.0283839	Up
AA355179	Hs.469386 /// Hs.660836	3631	gb:AA355179 /DB_XREF=gi:2007571 /DB_XREF=EST63624 /FEA=FLmRNA /CNT=53 /TID=Hs.32944.0 /TIER=ConsEnd /STK=0 /UG=Hs.32944 /LL=3631 /UG_GENE=INPP4A /UG_TITLE=inositol polyphosphate-4-phosphatase, type I, 107kD /FL=gb:U26398.1 gb:NM_004027.1	inositol polyphosphate-4-phosphatase, type I, 107kDa	INPP4A	chr2q11.2	NP_001127696 /// NP_001127697 /// NP_001557 /// NP_004018	NM_001134224 /// NM_001134225 /// NM_001566 /// NM_004027	3.17786	2.81848	2.88983	3.87799	4.1496	4.33138	2.23605	0.0375724	Up
BC042500	Hs.30323	339500	gb:BC042500.1 /DB_XREF=gi:27503773 /TID=Hs2.437170.1 /CNT=3 /FEA=FLmRNA /TIER=FL /STK=1 /UG=Hs.437170 /DEF=Homo sapiens, Similar to zinc finger protein 43 (HTF6), clone MGC:42493 IMAGE:4823179, mRNA, complete cds. /PROD=Similar to zinc finger protein 43 (HTF6) /FL=gb:BC042500.1	zinc finger protein 678	ZNF678	chr1q42.13	NP_848644	NM_032755 /// NM_178549 /// NR_033184 /// NR_102302	2.58765	3.26172	4.74323	3.88735	4.25879	5.92321	2.23249	0.00571551	Up
AW665063	Hs.306412	10044	gb:AW665063 /DB_XREF=gi:7457608 /DB_XREF=hi86g06.x1 /CLONE=IMAGE:2979226 /FEA=FLmRNA /CNT=51 /TID=Hs.26054.0 /TIER=Stack /STK=39 /UG=Hs.26054 /LL=10044 /UG_GENE=NSP3 /UG_TITLE=novel SH2-containing protein 3 /FL=gb:NM_005489.1 gb:AF124251.1	SH2 domain containing 3C	SH2D3C	chr9q34.11	NP_001136003 /// NP_001136004 /// NP_001136005 /// NP_001136006 /// NP_001239263 /// NP_005480 /// NP_733745	NM_001142531 /// NM_001142532 /// NM_001142533 /// NM_001142534 /// NM_001252334 /// NM_005489 /// NM_170600	4.99695	4.97343	4.64287	5.72596	6.49951	5.74326	2.22994	0.0398686	Up
AL136764	Hs.269128 /// Hs.594110 /// Hs.734511	23235	gb:AL136764.1 /DB_XREF=gi:12053044 /GEN=DKFZp434K1115 /FEA=FLmRNA /CNT=61 /TID=Hs.42676.0 /TIER=FL /STK=0 /UG=Hs.42676 /LL=23235 /DEF=Homo sapiens mRNA; cDNA DKFZp434K1115 (from clone DKFZp434K1115); complete cds. /PROD=hypothetical protein /FL=gb:AL136764.1	salt-inducible kinase 2	SIK2	chr11q23.1	NP_056006	NM_015191	4.87445	4.40493	4.75435	6.00108	5.30492	6.11203	2.22878	0.0134416	Up
BF055274	Hs.465323 /// Hs.606178	57614	gb:BF055274 /DB_XREF=gi:10809170 /DB_XREF=7j77e10.x1 /CLONE=IMAGE:3392490 /FEA=mRNA /CNT=90 /TID=Hs.23542.0 /TIER=Stack /STK=29 /UG=Hs.23542 /LL=57614 /UG_GENE=KIAA1468 /UG_TITLE=KIAA1468 protein	KIAA1468	KIAA1468	chr18q21.33	NP_065905	NM_020854	5.55981	5.73805	5.93573	7.22351	6.58991	6.84206	2.22871	0.0489242	Up
AL133101	Hs.617842 /// Hs.642449 /// Hs.656959 /// Hs.733475	387119	gb:AL133101.1 /DB_XREF=gi:6453584 /FEA=mRNA /CNT=31 /TID=Hs.99508.0 /TIER=Stack /STK=18 /UG=Hs.99508 /UG_TITLE=Homo sapiens mRNA; cDNA DKFZp434O0921 (from clone DKFZp434O0921) /DEF=Homo sapiens mRNA; cDNA DKFZp434O0921 (from clone DKFZp434O0921).	centrosomal protein 85kDa-like	CEP85L	chr6q22	NP_001035940 /// NP_001171506 /// NP_996804	NM_001042475 /// NM_001178035 /// NM_206921	4.1712	4.67372	4.10297	5.70177	5.45461	5.26028	2.21051	0.0332925	Up
NM_014463	Hs.111632 /// Hs.587203 /// Hs.588160 /// Hs.614272	27258	gb:NM_014463.1 /DB_XREF=gi:7657314 /GEN=LSM3 /FEA=FLmRNA /CNT=164 /TID=Hs.111632.0 /TIER=FL+Stack /STK=62 /UG=Hs.111632 /LL=27258 /DEF=Homo sapiens Lsm3 protein (LSM3), mRNA. /PROD=Lsm3 protein /FL=gb:NM_014463.1 gb:AF182418.1 gb:AF182289.1	LSM3 homolog, U6 small nuclear RNA associated (S. cerevisiae)	LSM3	chr3p25.1	NP_055278	NM_014463	4.83931	5.79574	5.59293	6.30864	6.43121	6.97825	2.20204	0.0481905	Up
NM_004786	Hs.114412 /// Hs.252866 /// Hs.592777 /// Hs.607142 /// Hs.619989 /// Hs.729249	9352	gb:NM_004786.1 /DB_XREF=gi:4759273 /GEN=TXNL /FEA=FLmRNA /CNT=199 /TID=Hs.18792.0 /TIER=FL+Stack /STK=51 /UG=Hs.18792 /LL=9352 /DEF=Homo sapiens thioredoxin-like, 32kD (TXNL), mRNA. /PROD=thioredoxin-like, 32kD /FL=gb:BC001156.1 gb:AF003938.1 gb:AF051896.1 gb:AF052659.1 gb:NM_004786.1	thioredoxin-like 1	TXNL1	chr18q21.31	NP_004777	NM_004786 /// NR_024546	7.37107	7.21118	8.27471	8.6396	8.62158	9.1689	2.19482	0.0163039	Up
BC001743	---	---	gb:BC001743.1 /DB_XREF=gi:12804636 /FEA=FLmRNA /CNT=92 /TID=Hs.8173.1 /TIER=FL /STK=0 /UG=Hs.8173 /LL=55744 /UG_GENE=FLJ10803 /DEF=Homo sapiens, Similar to hypothetical protein FLJ10803, clone MGC:933, mRNA, complete cds. /PROD=Similar to hypothetical protein FLJ10803 /FL=gb:BC001743.1	---	---	---	---	---	3.6444	3.59898	4.01386	4.65641	5.17126	4.7922	2.18164	0.0414413	Up
BE790854	Hs.520026	7407	gb:BE790854 /DB_XREF=gi:10212052 /DB_XREF=601582271F1 /CLONE=IMAGE:3936952 /FEA=FLmRNA /CNT=309 /TID=Hs.159637.0 /TIER=Stack /STK=44 /UG=Hs.159637 /LL=7407 /UG_GENE=VARS2 /UG_TITLE=valyl-tRNA synthetase 2 /FL=gb:NM_006295.1	valyl-tRNA synthetase	VARS	chr6p21.3	NP_006286	NM_006295	6.2013	5.15895	4.96864	7.43463	6.10363	6.01495	2.17913	0.00612919	Up
M87338	Hs.647062	5982	M87338 /FEATURE= /DEFINITION=HUMA1SBU Human replication factor C, 40-kDa subunit (A1) mRNA, complete cds	replication factor C (activator 1) 2, 40kDa	RFC2	chr7q11.23	NP_002905 /// NP_852136	NM_002914 /// NM_181471	3.28338	3.4133	2.80066	4.50225	4.6836	3.46915	2.17252	0.0318913	Up
L19185	Hs.432121	7001	Cluster Incl. L19185:Human natural killer cell enhancing factor (NKEFB) mRNA, complete cds /cds=(124,720) /gb=L19185 /gi=440307 /ug=Hs.146354 /len=980	peroxiredoxin 2	PRDX2	chr19p13.2	NP_005800 /// NP_859428	NM_005809 /// NM_181737 /// NM_181738	7.14773	6.5666	8.41467	8.25842	7.92952	9.4548	2.16629	0.00692512	Up
NM_024903	Hs.657924 /// Hs.672771 /// Hs.745030	79963	gb:NM_024903.1 /DB_XREF=gi:13435146 /GEN=FLJ14297 /FEA=FLmRNA /CNT=9 /TID=Hs.245043.0 /TIER=FL /STK=1 /UG=Hs.245043 /LL=79963 /DEF=Homo sapiens hypothetical protein FLJ14297 (FLJ14297), mRNA. /PROD=hypothetical protein FLJ14297 /FL=gb:NM_024903.1	ATP-binding cassette, sub-family A (ABC1), member 11, pseudogene	ABCA11P	chr4p16.3	---	NM_024903 /// NR_002451	3.41575	3.5802	3.76256	4.36495	4.30485	5.2483	2.16492	0.0430126	Up
NM_031219	Hs.7739	81932	gb:NM_031219.1 /DB_XREF=gi:13654293 /GEN=MGC12904 /FEA=FLmRNA /CNT=1 /TID=HsAffx.900179.79 /TIER=FL /STK=0 /DEF=Homo sapiens hypothetical protein MGC12904 (MGC12904), mRNA. /PROD=hypothetical protein MGC12904 /FL=gb:NM_031219.1	haloacid dehalogenase-like hydrolase domain containing 3	HDHD3	chr9q32	NP_112496	NM_031219	4.37485	3.9781	4.43446	5.27572	5.01847	5.76888	2.16206	0.0134198	Up
AK001846	Hs.373763 /// Hs.600463 /// Hs.625686	10236	gb:AK001846.1 /DB_XREF=gi:7023367 /FEA=mRNA /CNT=15 /TID=Hs.8412.0 /TIER=ConsEnd /STK=0 /UG=Hs.8412 /UG_TITLE=Homo sapiens cDNA FLJ10984 fis, clone PLACE1001810 /DEF=Homo sapiens cDNA FLJ10984 fis, clone PLACE1001810.	heterogeneous nuclear ribonucleoprotein R	HNRNPR	chr1p36.12	NP_001095867 /// NP_001095868 /// NP_001095869 /// NP_005817	NM_001102397 /// NM_001102398 /// NM_001102399 /// NM_005826	3.96082	3.84944	4.67009	4.79326	5.3846	5.64106	2.15363	0.0353271	Up
AI809206	Hs.600837 /// Hs.610647 /// Hs.706676	64343	gb:AI809206 /DB_XREF=gi:5395772 /DB_XREF=wf69a11.x1 /CLONE=IMAGE:2360828 /FEA=FLmRNA /CNT=150 /TID=Hs.164478.0 /TIER=Stack /STK=23 /UG=Hs.164478 /LL=64343 /UG_GENE=FLJ21939 /UG_TITLE=hypothetical protein FLJ21939 similar to 5-azacytidine induced gene 2 /FL=gb:NM_022461.1	5-azacytidine induced 2	AZI2	chr3p24.1	NP_001127904 /// NP_001127905 /// NP_001258579 /// NP_071906	NM_001134432 /// NM_001134433 /// NM_001271650 /// NM_022461	4.22028	3.98029	3.63419	5.28811	5.33636	4.40779	2.14997	0.0239971	Up
NM_020313	Hs.4900	57019	gb:NM_020313.1 /DB_XREF=gi:10092672 /GEN=LOC57019 /FEA=FLmRNA /CNT=2 /TID=Hs.4900.0 /TIER=FL /STK=0 /UG=Hs.4900 /LL=57019 /DEF=Homo sapiens hypothetical protein (LOC57019), mRNA. /PROD=hypothetical protein /FL=gb:NM_020313.1	cytokine induced apoptosis inhibitor 1	CIAPIN1	chr16q21	NP_064709	NM_020313	3.37844	5.96675	3.31771	4.0239	7.08591	4.68247	2.14443	0.0385976	Up
BF447037	Hs.482605 /// Hs.602021 /// Hs.619574 /// Hs.642358	133746	gb:BF447037 /DB_XREF=gi:11512175 /DB_XREF=7o67e12.x1 /CLONE=IMAGE:3579358 /FEA=EST /CNT=48 /TID=Hs.294110.0 /TIER=Stack /STK=29 /UG=Hs.294110 /UG_TITLE=ESTs	junction mediating and regulatory protein, p53 cofactor	JMY	chr5q14.1	NP_689618	NM_152405	3.35378	3.04367	4.00266	4.31192	4.30291	5.10076	2.14253	0.00613948	Up
NM_004384	Hs.129206 /// Hs.705840	1456	gb:NM_004384.1 /DB_XREF=gi:4758079 /GEN=CSNK1G3 /FEA=FLmRNA /CNT=3 /TID=Hs.129206.0 /TIER=FL /STK=1 /UG=Hs.129206 /LL=1456 /DEF=Homo sapiens casein kinase 1, gamma 3 (CSNK1G3), mRNA. /PROD=casein kinase 1, gamma 3 /FL=gb:NM_004384.1 gb:AF049089.1	casein kinase 1, gamma 3	CSNK1G3	chr5q23	NP_001026982 /// NP_001038188 /// NP_001257501 /// NP_001257502 /// NP_001257503 /// NP_004375	NM_001031812 /// NM_001044722 /// NM_001044723 /// NM_001270572 /// NM_001270573 /// NM_001270574 /// NM_004384	4.33253	4.99061	3.86798	5.13874	6.25701	4.92342	2.13487	0.0158833	Up
NM_006082	Hs.524390 /// Hs.655738	10376	gb:NM_006082.1 /DB_XREF=gi:5174476 /GEN=K-ALPHA-1 /FEA=FLmRNA /CNT=757 /TID=Hs.278242.0 /TIER=FL+Stack /STK=743 /UG=Hs.278242 /LL=10376 /DEF=Homo sapiens tubulin, alpha, ubiquitous (K-ALPHA-1), mRNA. /PROD=tubulin, alpha, ubiquitous /FL=gb:BC001209.1 gb:BC001128.1 gb:BC000696.1 gb:AF081484.1 gb:K00558.1 gb:NM_006082.1	tubulin, alpha 1b	TUBA1B	chr12q13.12	NP_006073	NM_006082	7.34551	7.88935	7.70175	8.22101	8.73666	9.15786	2.1321	0.0333148	Up
NM_005689	Hs.107911 /// Hs.323363 /// Hs.603397	10058	gb:NM_005689.1 /DB_XREF=gi:9955962 /GEN=ABCB6 /FEA=FLmRNA /CNT=182 /TID=Hs.107911.0 /TIER=FL+Stack /STK=126 /UG=Hs.107911 /LL=10058 /DEF=Homo sapiens ATP-binding cassette, sub-family B (MDRTAP), member 6 (ABCB6), nuclear gene encoding mitochondrial protein, mRNA. /PROD=ATP-binding cassette, sub-family B, member 6 /FL=gb:AF308472.1 gb:BC000559.1 gb:AF076775.1 gb:NM_005689.1	ATP-binding cassette, sub-family B (MDR/TAP), member 6	ABCB6	chr2q36	NP_005680	NM_005689	4.13917	4.51551	4.01133	4.92724	5.94435	4.83833	2.13026	0.0393371	Up
BC030130	Hs.518602 /// Hs.727283	7466	gb:BC030130.1 /DB_XREF=gi:20987220 /TID=Hs2.26077.2 /CNT=1 /FEA=FLmRNA /TIER=FL /STK=1 /LL=7466 /UG_GENE=WFS1 /UG=Hs.26077 /DEF=Homo sapiens, Wolfram syndrome 1 (wolframin), clone MGC:12754 IMAGE:4127654, mRNA, complete cds. /PROD=Wolfram syndrome 1 (wolframin) /FL=gb:BC030130.1	Wolfram syndrome 1 (wolframin)	WFS1	chr4p16.1	NP_001139325 /// NP_005996	NM_001145853 /// NM_006005	4.93989	4.05109	3.84594	5.87717	5.41523	4.87568	2.12175	0.0133615	Up
BC000767	Hs.435759	51078	gb:BC000767.1 /DB_XREF=gi:12653946 /FEA=FLmRNA /CNT=3 /TID=Hs.182986.1 /TIER=FL /STK=0 /UG=Hs.182986 /LL=51078 /UG_GENE=LOC51078 /DEF=Homo sapiens, Similar to CGI-36 protein, clone MGC:2808, mRNA, complete cds. /PROD=Similar to CGI-36 protein /FL=gb:BC000767.1 gb:BC001842.1	THAP domain containing 4	THAP4	chr2q37.3	NP_001157828 /// NP_057047	NM_001164356 /// NM_015963	5.806	5.7619	5.90305	7.17548	6.79188	6.71683	2.12024	0.0220487	Up
D21262	Hs.523238	9221	gb:D21262.1 /DB_XREF=gi:434764 /GEN=KIAA0035 /FEA=mRNA /CNT=426 /TID=Hs.75337.1 /TIER=Stack /STK=144 /UG=Hs.75337 /LL=9221 /DEF=Human mRNA for KIAA0035 gene, partial cds. /PROD=ORF	nucleolar and coiled-body phosphoprotein 1	NOLC1	chr10q24.32	NP_004732	NM_004741	6.46642	6.43997	6.62924	7.39119	7.22027	8.04068	2.11604	0.0321537	Up
BF446442	Hs.671679	---	gb:BF446442 /DB_XREF=gi:11511580 /DB_XREF=7q99c09.x1 /CLONE=IMAGE:3706384 /FEA=EST /CNT=5 /TID=Hs.257519.0 /TIER=ConsEnd /STK=5 /UG=Hs.257519 /UG_TITLE=ESTs	---	---	---	---	---	3.42901	2.84377	3.02869	4.75637	4.00291	3.60166	2.11412	0.0467665	Up
AW182892	Hs.376933	2987	gb:AW182892 /DB_XREF=gi:6451352 /DB_XREF=xp99c02.x1 /CLONE=IMAGE:2748482 /FEA=EST /CNT=37 /TID=Hs.3764.1 /TIER=Stack /STK=15 /UG=Hs.3764 /LL=2987 /UG_GENE=GUK1 /UG_TITLE=guanylate kinase 1	guanylate kinase 1	GUK1	chr1q32-q41	NP_000849 /// NP_001152862 /// NP_001152863 /// NP_001229768 /// NP_001229769	NM_000858 /// NM_001159390 /// NM_001159391 /// NM_001242839 /// NM_001242840	4.76416	5.05503	4.46692	5.8297	6.01035	5.72165	2.10953	0.00635055	Up
AK092957	Hs.636021	---	gb:AK092957.1 /DB_XREF=gi:21751671 /TID=Hs2.376538.1 /CNT=1 /FEA=mRNA /TIER=ConsEnd /STK=0 /UG=Hs.376538 /UG_TITLE=Homo sapiens cDNA FLJ35638 fis, clone SPLEN2012179. /DEF=Homo sapiens cDNA FLJ35638 fis, clone SPLEN2012179.	---	---	---	---	---	3.95172	3.38705	3.40933	4.74272	4.57568	4.71869	2.10478	0.0197976	Up
AA525163	Hs.274531	23517	gb:AA525163 /DB_XREF=gi:2266091 /DB_XREF=ni51b06.s1 /CLONE=IMAGE:980339 /FEA=EST /CNT=25 /TID=Hs.41569.2 /TIER=Stack /STK=16 /UG=Hs.41569 /LL=8611 /UG_GENE=PPAP2A /UG_TITLE=phosphatidic acid phosphatase type 2A	superkiller viralicidic activity 2-like 2 (S. cerevisiae)	SKIV2L2	chr5q11.2	NP_056175	NM_015360	4.34071	4.8343	4.78574	5.54641	5.84314	5.82192	2.10425	0.003213	Up
BG290908	Hs.216623	5205	gb:BG290908 /DB_XREF=gi:13048345 /DB_XREF=602387068F1 /CLONE=IMAGE:4515905 /FEA=EST /CNT=60 /TID=Hs.44343.0 /TIER=Stack /STK=39 /UG=Hs.44343 /UG_TITLE=ESTs, Moderately similar to ALU8_HUMAN ALU SUBFAMILY SX SEQUENCE CONTAMINATION WARNING ENTRY (H.sapiens)	ATPase, aminophospholipid transporter, class I, type 8B, member 1	ATP8B1	chr18q21.31	NP_005594	NM_005603	4.01211	4.15365	4.95324	5.46623	4.89544	5.96352	2.10087	0.0357558	Up
AA527433	Hs.14846 /// Hs.604662	6541	gb:AA527433 /DB_XREF=gi:2269502 /DB_XREF=ng41b03.s1 /CLONE=IMAGE:937325 /FEA=mRNA /CNT=189 /TID=Hs.14846.0 /TIER=Stack /STK=30 /UG=Hs.14846 /UG_TITLE=Homo sapiens mRNA; cDNA DKFZp564D016 (from clone DKFZp564D016)	solute carrier family 7 (cationic amino acid transporter, y+ system), member 1	SLC7A1	chr13q12.3	NP_003036	NM_003045	5.38157	6.29152	6.31411	6.39461	7.62301	7.07663	2.08554	0.0243505	Up
BG501875	Hs.306221 /// Hs.604906	284695	gb:BG501875 /DB_XREF=gi:13463392 /DB_XREF=602548974F1 /CLONE=IMAGE:4654818 /FEA=EST /CNT=6 /TID=Hs.131005.0 /TIER=ConsEnd /STK=0 /UG=Hs.131005 /UG_TITLE=ESTs, Moderately similar to zinc finger protein (M.musculus)	zinc finger protein 326	ZNF326	chr1p22.2	NP_892020 /// NP_892021	NM_181781 /// NM_182975 /// NM_182976	5.15895	4.8329	5.90461	6.42737	6.24598	6.58646	2.07892	0.0375416	Up
AL034396	Hs.156257 /// Hs.550094 /// Hs.604530 /// Hs.649423	7789 /// 158586	gb:AL034396 /DB_XREF=gi:4902597 /FEA=DNA /CNT=4 /TID=Hs.159249.0 /TIER=ConsEnd /STK=0 /UG=Hs.159249 /LL=7789 /UG_GENE=ZXDA /UG_TITLE=zinc finger, X-linked, duplicated A /DEF=Human DNA sequence from clone 1158B12 on chromosome Xp11.21-11.4 Contains the ZXDA gene for X-linked duplicated Zinc finger A, and MYCL1 (v-myc avian myelocytomatosis viral oncogene homolog 1, lung carcinoma derived) and KRT8…	zinc finger, X-linked, duplicated A /// zinc finger, X-linked, duplicated B	ZXDA /// ZXDB	chrXp11.1 /// chrXp11.21	NP_009087 /// NP_009088	NM_007156 /// NM_007157	4.98098	3.89687	4.32483	6.09509	5.2477	4.98697	2.07564	0.0355696	Up
BG152979	Hs.515329 /// Hs.554762 /// Hs.593016 /// Hs.630973 /// Hs.738435	6146	gb:BG152979 /DB_XREF=gi:12665009 /DB_XREF=nah24c06.y1 /CLONE=IMAGE:4232050 /FEA=EST /CNT=79 /TID=Hs.99914.2 /TIER=Stack /STK=24 /UG=Hs.99914 /LL=6146 /UG_GENE=RPL22 /UG_TITLE=ribosomal protein L22	ribosomal protein L22	RPL22	chr1p36.31	NP_000974	NM_000983	9.02797	9.49052	9.01144	10.2206	10.087	10.4159	2.07518	0.0479414	Up
BG395660	Hs.529420 /// Hs.701398	7327	gb:BG395660 /DB_XREF=gi:13289108 /DB_XREF=602458292F1 /CLONE=IMAGE:4580782 /FEA=FLmRNA /CNT=203 /TID=Hs.192853.0 /TIER=Stack /STK=11 /UG=Hs.192853 /LL=7327 /UG_GENE=UBE2G2 /UG_TITLE=ubiquitin-conjugating enzyme E2G 2 (homologous to yeast UBC7) /FL=gb:NM_003343.1 gb:BC001738.1 gb:AF032456.1	ubiquitin-conjugating enzyme E2G 2	UBE2G2	chr21q22.3	NP_001189418 /// NP_003334 /// NP_872630	NM_001202489 /// NM_003343 /// NM_182688	6.70275	7.14943	6.90306	7.93592	7.76362	8.2137	2.07497	0.0411421	Up
AW001101	Hs.368255	23392	gb:AW001101 /DB_XREF=gi:5848017 /DB_XREF=wu24c05.x1 /CLONE=IMAGE:2520968 /FEA=mRNA /CNT=147 /TID=Hs.3852.1 /TIER=Stack /STK=36 /UG=Hs.3852 /LL=23392 /UG_GENE=KIAA0368 /UG_TITLE=KIAA0368 protein	KIAA0368	KIAA0368	chr9q31.3	NP_001073867	NM_001080398	4.9076	5.33764	5.2953	6.32739	6.01132	6.36763	2.07236	0.0392821	Up
BG435404	Hs.111554 /// Hs.592654 /// Hs.717035 /// Hs.730678 /// Hs.740851	10123	gb:BG435404 /DB_XREF=gi:13341910 /DB_XREF=602507678F1 /CLONE=IMAGE:4605066 /FEA=FLmRNA /CNT=182 /TID=Hs.111554.0 /TIER=Stack /STK=51 /UG=Hs.111554 /LL=10123 /UG_GENE=ARL7 /UG_TITLE=ADP-ribosylation factor-like 7 /FL=gb:BC001051.1 gb:NM_005737.2 gb:AB016811.1	ADP-ribosylation factor-like 4C	ARL4C	chr2q37.1	NP_005728	NM_005737	5.61742	6.13143	6.41618	7.0669	7.20072	7.14457	2.06587	0.0350859	Up
NM_172098	Hs.185774 /// Hs.716012	2140	gb:NM_172098.1 /DB_XREF=gi:26667245 /GEN=EYA3 /TID=Hs2.46925.1 /CNT=23 /FEA=FLmRNA /TIER=FL+Stack /STK=8 /LL=2140 /UG=Hs.46925 /DEF=Homo sapiens eyes absent homolog 3 (Drosophila) (EYA3), transcript variant 2, mRNA. /PROD=eyes absent 3 isoform b /FL=gb:NM_172098.1	eyes absent homolog 3 (Drosophila)	EYA3	chr1p36	NP_001981	NM_001990 /// NM_172098	4.07695	3.13286	2.6703	5.15838	4.32302	3.37107	2.06394	0.0216968	Up
BC004439	Hs.20716 /// Hs.713731 /// Hs.732181	10440	gb:BC004439.1 /DB_XREF=gi:13325239 /FEA=FLmRNA /CNT=411 /TID=Hs.20716.0 /TIER=FL /STK=0 /UG=Hs.20716 /LL=10440 /UG_GENE=TIM17 /DEF=Homo sapiens, translocase of inner mitochondrial membrane 17 (yeast) homolog A, clone MGC:4031, mRNA, complete cds. /PROD=translocase of inner mitochondrial membrane 17(yeast) homolog A /FL=gb:NM_006335.1 gb:AF106622.1 gb:BC004439.1	translocase of inner mitochondrial membrane 17 homolog A (yeast)	TIMM17A	chr1q32.1	NP_006326	NM_006335	4.25198	4.41076	4.39516	4.9916	5.42431	5.69083	2.05998	0.024052	Up
NM_000784	Hs.516700	1593	gb:NM_000784.1 /DB_XREF=gi:4503210 /GEN=CYP27A1 /FEA=FLmRNA /CNT=80 /TID=Hs.82568.0 /TIER=FL+Stack /STK=30 /UG=Hs.82568 /LL=1593 /DEF=Homo sapiens cytochrome P450, subfamily XXVIIA (steroid 27-hydroxylase, cerebrotendinous xanthomatosis), polypeptide 1 (CYP27A1), mRNA. /PROD=cytochrome P450, subfamily XXVIIA (steroid27-hydroxylase, cerebrotendinous xanthomatosis),polypeptide 1 /FL=gb:NM_000784.1 …	cytochrome P450, family 27, subfamily A, polypeptide 1	CYP27A1	chr2q33-qter	NP_000775	NM_000784	6.46405	5.6293	6.31696	7.45275	6.89636	7.25681	2.05628	0.00902898	Up
AK024556	Hs.684549	100642175	gb:AK024556.1 /DB_XREF=gi:10436865 /TID=Hs2.383622.1 /CNT=1 /FEA=mRNA /TIER=ConsEnd /STK=0 /UG=Hs.383622 /UG_TITLE=Homo sapiens cDNA: FLJ20903 fis, clone ADSE00222. /DEF=Homo sapiens cDNA: FLJ20903 fis, clone ADSE00222.	SPRY4 intronic transcript 1 (non-protein coding)	SPRY4-IT1	chr5q31.3	---	---	4.10379	3.92661	3.84017	4.87922	5.15187	4.9263	2.04163	0.0162923	Up
AK023627	Hs.733746	6991	gb:AK023627.1 /DB_XREF=gi:10435610 /FEA=mRNA /CNT=31 /TID=Hs.25094.0 /TIER=ConsEnd /STK=0 /UG=Hs.25094 /UG_TITLE=Homo sapiens cDNA FLJ13565 fis, clone PLACE1008231 /DEF=Homo sapiens cDNA FLJ13565 fis, clone PLACE1008231.	t-complex-associated-testis-expressed 3	TCTE3	chr6q27	NP_777570	NM_174910	3.10688	3.2131	3.7349	3.88547	3.94741	5.05526	2.03365	0.0375679	Up
N51405	Hs.433668 /// Hs.735404	757	gb:N51405 /DB_XREF=gi:1192571 /DB_XREF=yz17a06.s1 /CLONE=IMAGE:283282 /FEA=EST /CNT=21 /TID=Hs.9042.2 /TIER=Stack /STK=13 /UG=Hs.9042 /UG_TITLE=Homo sapiens EST from clone 491476, full insert	transmembrane protein 50B	TMEM50B	chr21q22.11	NP_006125	NM_006134 /// NR_038211 /// NR_040016	4.64674	5.51692	5.68869	5.39232	6.66166	6.71775	2.02993	0.0145242	Up
NM_014648	Hs.409210	9666	gb:NM_014648.1 /DB_XREF=gi:7662243 /GEN=KIAA0675 /FEA=FLmRNA /CNT=5 /TID=Hs.165662.0 /TIER=FL /STK=3 /UG=Hs.165662 /LL=9666 /DEF=Homo sapiens KIAA0675 gene product (KIAA0675), mRNA. /PROD=KIAA0675 gene product /FL=gb:AB014575.1 gb:NM_014648.1	DAZ interacting zinc finger protein 3	DZIP3	chr3q13.13	NP_055463	NM_014648	4.00755	3.2512	2.94693	4.8319	4.42007	4.13743	2.02564	0.0122623	Up
NM_006984	Hs.534377	9071	gb:NM_006984.1 /DB_XREF=gi:5921464 /GEN=CLDN10 /FEA=FLmRNA /CNT=43 /TID=Hs.26126.0 /TIER=FL+Stack /STK=20 /UG=Hs.26126 /LL=9071 /DEF=Homo sapiens claudin 10 (CLDN10), mRNA. /PROD=claudin 10 /FL=gb:U89916.1 gb:NM_006984.1	claudin 10	CLDN10	chr13q31-q34	NP_001153572 /// NP_008915 /// NP_878268	NM_001160100 /// NM_006984 /// NM_182848	3.72769	3.30851	6.39775	5.35348	4.28999	7.29242	2.02106	0.0368814	Up
AA150110	Hs.212332 /// Hs.737623	858	gb:AA150110 /DB_XREF=gi:1721541 /DB_XREF=zl06b01.s1 /CLONE=IMAGE:491497 /FEA=EST /CNT=68 /TID=Hs.139851.1 /TIER=Stack /STK=57 /UG=Hs.139851 /LL=858 /UG_GENE=CAV2 /UG_TITLE=caveolin 2	caveolin 2	CAV2	chr7q31.1	NP_001193676 /// NP_001193677 /// NP_001224 /// NP_937855	NM_001206747 /// NM_001206748 /// NM_001233 /// NM_198212	5.33363	5.20094	5.12604	6.53217	6.23838	5.86315	2.01962	0.0181097	Up
N74662	Hs.421848 /// Hs.744144	84545	gb:N74662 /DB_XREF=gi:1231947 /DB_XREF=za78a09.s1 /CLONE=IMAGE:298648 /FEA=EST /CNT=11 /TID=Hs.151945.1 /TIER=Stack /STK=8 /UG=Hs.151945 /UG_TITLE=Human DNA sequence from clone RP11-108L7 on chromosome 10. contains part of the gene for a novel Insulin-like growth factor binding type protein with Kazal-type serine protease inhibitor domain, the gene for a novel protein similar to rat tricarboxylat…	mitochondrial ribosomal protein L43	MRPL43	chr10q24.31	NP_115488 /// NP_789762 /// NP_789763 /// NP_789764	NM_032112 /// NM_176792 /// NM_176793 /// NM_176794	5.35074	4.91332	4.83338	6.30491	6.22587	5.54375	2.01665	0.0296809	Up
NM_016004	Hs.444332	51098	gb:NM_016004.1 /DB_XREF=gi:7705768 /GEN=LOC51098 /FEA=FLmRNA /CNT=81 /TID=Hs.24994.0 /TIER=FL+Stack /STK=42 /UG=Hs.24994 /LL=51098 /DEF=Homo sapiens CGI-53 protein (LOC51098), mRNA. /PROD=CGI-53 protein /FL=gb:NM_016004.1 gb:AF151811.1	intraflagellar transport 52 homolog (Chlamydomonas)	IFT52	---	NP_057088	NM_016004	3.81	4.22671	4.15374	5.03438	5.05204	5.16904	2.01642	0.0124855	Up
NM_001155	Hs.412117	309	gb:NM_001155.2 /DB_XREF=gi:4809274 /GEN=ANXA6 /FEA=FLmRNA /CNT=311 /TID=Hs.118796.0 /TIER=FL+Stack /STK=74 /UG=Hs.118796 /LL=309 /DEF=Homo sapiens annexin A6 (ANXA6), transcript variant 1, mRNA. /PROD=annexin VI isoform 1 /FL=gb:D00510.1 gb:J03578.1 gb:NM_001155.2	annexin A6	ANXA6	chr5q33.1	NP_001146 /// NP_001180473	NM_001155 /// NM_001193544 /// NM_004033	4.20502	5.2095	4.69186	5.67075	5.93487	5.66452	2.00316	0.040041	Up
AL521247	Hs.743984	389831	gb:AL521247 /DB_XREF=gi:12784740 /DB_XREF=AL521247 /CLONE=CS0DB001YH03 (3 prime) /FEA=mRNA /CNT=118 /TID=Hs.90424.1 /TIER=Stack /STK=8 /UG=Hs.90424 /UG_TITLE=Homo sapiens cDNA: FLJ23285 fis, clone HEP09071	uncharacterized LOC389831	LOC389831	---	NP_001229409	NM_001242480	5.34276	7.67204	7.04643	4.75408	6.56231	6.05713	0.49925	0.029541	Down
BC026117	Hs.571218	---	gb:BC026117.1 /DB_XREF=gi:22169859 /TID=Hs2.382218.1 /CNT=2 /FEA=mRNA /TIER=ConsEnd /STK=1 /UG=Hs.382218 /UG_TITLE=Homo sapiens, clone IMAGE:4824322, mRNA /DEF=Homo sapiens, clone IMAGE:4824322, mRNA.	NULL /// NULL	AC006004.1 /// OTTHUMG00000152744	---	---	---	4.67273	4.31559	4.36677	3.42449	3.39438	3.54541	0.498528	0.0163138	Down
AI419423	Hs.387471 /// Hs.697385	64895	gb:AI419423 /DB_XREF=gi:4265354 /DB_XREF=tf28d09.x1 /CLONE=IMAGE:2097521 /FEA=EST /CNT=16 /TID=Hs.172780.0 /TIER=ConsEnd /STK=3 /UG=Hs.172780 /UG_TITLE=ESTs	poly(A) polymerase gamma	PAPOLG	chr2p16.1	NP_075045	NM_022894	3.77591	4.76123	5.33248	2.96847	3.55866	4.3687	0.496473	0.0131689	Down
NM_001241	Hs.292754 /// Hs.591241 /// Hs.744115	905	gb:NM_001241.1 /DB_XREF=gi:4502628 /GEN=CCNT2 /FEA=FLmRNA /CNT=67 /TID=Hs.155478.0 /TIER=FL /STK=0 /UG=Hs.155478 /LL=905 /DEF=Homo sapiens cyclin T2 (CCNT2), mRNA. /PROD=cyclin T2 /FL=gb:AF048731.1 gb:NM_001241.1	cyclin T2	CCNT2	chr2q21.3	NP_001232 /// NP_490595	NM_001241 /// NM_058241 /// NR_037649	4.70216	5.4682	5.3271	4.01213	4.14569	4.38395	0.495404	0.0330812	Down
BF590997	Hs.288164 /// Hs.681817	55209	gb:BF590997 /DB_XREF=gi:11683321 /DB_XREF=7h47c07.x1 /CLONE=IMAGE:3319116 /FEA=EST /CNT=81 /TID=Hs.7187.1 /TIER=Stack /STK=20 /UG=Hs.7187 /LL=55209 /UG_GENE=FLJ10707 /UG_TITLE=hypothetical protein FLJ10707	SET domain containing 5	SETD5	chr3p25.3	NP_001073986	NM_001080517 /// NM_018187	5.55289	6.57675	7.09528	4.91811	5.73943	5.76397	0.494377	0.0456705	Down
BE501862	Hs.486458	93663	gb:BE501862 /DB_XREF=gi:9704270 /DB_XREF=hw36b09.x1 /CLONE=IMAGE:3184985 /FEA=mRNA /CNT=101 /TID=Hs.178705.0 /TIER=Stack /STK=8 /UG=Hs.178705 /UG_TITLE=Homo sapiens cDNA FLJ11333 fis, clone PLACE1010616	Rho GTPase activating protein 18	ARHGAP18	chr6q22.33	NP_277050	NM_033515	4.26999	6.80366	6.66283	3.69108	5.52294	5.79526	0.492526	0.0466983	Down
AA094434	Hs.468274 /// Hs.610508 /// Hs.624386	6546	gb:AA094434 /DB_XREF=gi:1640019 /DB_XREF=cp0312.seq.F /FEA=EST /CNT=6 /TID=Hs.283691.0 /TIER=ConsEnd /STK=0 /UG=Hs.283691 /UG_TITLE=ESTs	solute carrier family 8 (sodium/calcium exchanger), member 1	SLC8A1	chr2p23-p22	NP_001106271 /// NP_001106272 /// NP_001106273 /// NP_001239553 /// NP_066920	NM_001112800 /// NM_001112801 /// NM_001112802 /// NM_001252624 /// NM_021097	4.58946	5.30054	4.98353	3.50979	4.54067	3.56838	0.489135	0.0290866	Down
AW170520	Hs.591532	128272	gb:AW170520 /DB_XREF=gi:6402045 /DB_XREF=xn63a02.x1 /CLONE=IMAGE:2698346 /FEA=mRNA /CNT=45 /TID=Hs.56265.0 /TIER=Stack /STK=12 /UG=Hs.56265 /UG_TITLE=Homo sapiens mRNA; cDNA DKFZp586P2321 (from clone DKFZp586P2321)	Rho guanine nucleotide exchange factor (GEF) 19	ARHGEF19	chr1p36.13	NP_694945	NM_153213	6.67617	5.86224	5.78132	5.25709	5.15115	4.95609	0.486539	0.0462149	Down
AL512766	Hs.149305	56181	gb:AL512766.1 /DB_XREF=gi:12224993 /GEN=DKFZp564M0163 /FEA=FLmRNA /CNT=1 /TID=Hs.323396.0 /TIER=FL /STK=0 /UG=Hs.323396 /LL=56181 /DEF=Homo sapiens mRNA; cDNA DKFZp564M0163 (from clone DKFZp564M0163); complete cds. /PROD=hypothetical protein /FL=gb:AL512766.1	mitochondrial fission regulator 1-like	MTFR1L	chr1p36.11	NP_001093095 /// NP_001093096 /// NP_001093097 /// NP_062457	NM_001099625 /// NM_001099626 /// NM_001099627 /// NM_019557	7.54415	7.6766	8.01269	6.01312	6.65317	7.23148	0.485774	0.0372856	Down
NM_002260	Hs.512576 /// Hs.591157	3821 /// 3822	gb:NM_002260.2 /DB_XREF=gi:7108353 /GEN=KLRC2 /FEA=FLmRNA /CNT=12 /TID=Hs.177605.0 /TIER=FL /STK=1 /UG=Hs.177605 /LL=3822 /DEF=Homo sapiens killer cell lectin-like receptor subfamily C, member 2 (KLRC2), mRNA. /PROD=killer cell lectin-like receptor subfamily C,member 2 /FL=gb:NM_002260.2 gb:AF260134.1	killer cell lectin-like receptor subfamily C, member 1 /// killer cell lectin-like receptor subfamily C, member 2	KLRC1 /// KLRC2	chr12p13	NP_002250 /// NP_002251 /// NP_015567 /// NP_998822 /// NP_998823	NM_002259 /// NM_002260 /// NM_007328 /// NM_213657 /// NM_213658	4.10596	6.90198	5.24747	3.21795	5.84558	4.12269	0.481858	0.00469537	Down
AL359055	Hs.598388	346389	gb:AL359055.1 /DB_XREF=gi:8518180 /FEA=mRNA /CNT=13 /TID=Hs.67709.0 /TIER=ConsEnd /STK=0 /UG=Hs.67709 /UG_TITLE=Homo sapiens mRNA full length insert cDNA clone EUROIMAGE 2344436 /DEF=Homo sapiens mRNA full length insert cDNA clone EUROIMAGE 2344436.	metastasis associated in colon cancer 1	MACC1	chr7p21.1	NP_877439	NM_182762	4.85016	5.60873	4.05318	3.76378	4.36614	3.48005	0.481362	0.0410239	Down
AL049975	Hs.671954	---	gb:AL049975.1 /DB_XREF=gi:4884225 /FEA=mRNA /CNT=2 /TID=Hs.274510.0 /TIER=ConsEnd /STK=0 /UG=Hs.274510 /UG_TITLE=Homo sapiens mRNA; cDNA DKFZp564B032 (from clone DKFZp564B032) /DEF=Homo sapiens mRNA; cDNA DKFZp564B032 (from clone DKFZp564B032).	---	---	---	---	---	4.57312	5.07133	5.28693	3.55177	4.31845	3.86236	0.479159	0.0319182	Down
NM_030801	Hs.522650 /// Hs.571729 /// Hs.684232 /// Hs.709779 /// Hs.729070	81557 /// 728239 /// 100124541	gb:NM_030801.1 /DB_XREF=gi:13540587 /GEN=MAGE1 /FEA=FLmRNA /CNT=1 /TID=HsAffx.900072.23 /TIER=FL /STK=0 /DEF=Homo sapiens MAGE1 protein (MAGE1), mRNA. /PROD=MAGE1 protein /FL=gb:NM_030801.1	melanoma antigen family D, 4 /// melanoma antigen family D, 4B /// small nucleolar RNA, H/ACA box 11D	MAGED4 /// MAGED4B /// SNORA11D	chrXp11 /// chrXp11.22	NP_001092270 /// NP_001229291 /// NP_001258990 /// NP_001258991 /// NP_001258992 /// NP_110428 /// NP_803879 /// NP_803881	NM_001098800 /// NM_001242362 /// NM_001272061 /// NM_001272062 /// NM_001272063 /// NM_030801 /// NM_177535 /// NM_177537 /// NR_003711	6.43749	6.46644	6.98438	5.60695	5.05154	5.96662	0.478709	0.0241792	Down
AF237771	Hs.432914 /// Hs.623587	55742	gb:AF237771.1 /DB_XREF=gi:11036539 /GEN=PARVA /FEA=FLmRNA /CNT=208 /TID=Hs.44077.0 /TIER=FL+Stack /STK=14 /UG=Hs.44077 /LL=55742 /DEF=Homo sapiens alpha-parvin (PARVA) mRNA, complete cds. /PROD=alpha-parvin /FL=gb:NM_018222.1 gb:AF237771.1	parvin, alpha	PARVA	chr11p15.3	NP_060692	NM_018222	5.0169	5.14804	5.79403	3.79725	4.29744	4.67039	0.47867	0.01061	Down
AW511135	Hs.506325 /// Hs.601274 /// Hs.604140 /// Hs.629087 /// Hs.638185 /// Hs.735514	11163 /// 100996752 /// 101060261	gb:AW511135 /DB_XREF=gi:7149213 /DB_XREF=hd43g08.x1 /CLONE=IMAGE:2912318 /FEA=mRNA /CNT=201 /TID=Hs.92381.5 /TIER=Stack /STK=18 /UG=Hs.92381 /LL=11163 /UG_GENE=NUDT4 /UG_TITLE=nudix (nucleoside diphosphate linked moiety X)-type motif 4	uncharacterized LOC100996752 /// uncharacterized LOC101060261 /// nudix (nucleoside diphosphate linked moiety X)-type motif 4	LOC100996752 /// LOC101060261 /// NUDT4	chr12q21	NP_061967 /// NP_950241 /// XP_003846564 /// XP_003960320	NM_019094 /// NM_199040 /// XM_003846516 /// XM_003960271	4.69983	3.72502	5.00386	3.43828	3.12115	3.85717	0.477327	0.0384642	Down
NM_003247	Hs.371147 /// Hs.599698 /// Hs.604579	7058	gb:NM_003247.1 /DB_XREF=gi:4507486 /GEN=THBS2 /FEA=FLmRNA /CNT=196 /TID=Hs.108623.0 /TIER=FL+Stack /STK=59 /UG=Hs.108623 /LL=7058 /DEF=Homo sapiens thrombospondin 2 (THBS2), mRNA. /PROD=thrombospondin 2 /FL=gb:NM_003247.1 gb:L12350.1	thrombospondin 2	THBS2	chr6q27	NP_003238	NM_003247	7.04694	9.15543	7.14709	5.73441	8.23352	5.58997	0.476638	0.020756	Down
NM_144665	Hs.120633 /// Hs.487845 /// Hs.599489 /// Hs.624745 /// Hs.739684	143686	gb:NM_144665.1 /DB_XREF=gi:21389546 /TID=Hs2.350558.1 /CNT=5 /FEA=FLmRNA /TIER=FL /STK=0 /LL=143686 /UG_GENE=MGC29667 /UG=Hs.350558 /UG_TITLE=hypothetical protein MGC29667 /DEF=Homo sapiens hypothetical protein MGC29667 (MGC29667), mRNA. /FL=gb:NM_144665.1 gb:BC017296.1	sestrin 3	SESN3	chr11q21	NP_001258523 /// NP_653266	NM_001271594 /// NM_144665	4.01648	4.46929	4.58117	3.4043	3.21161	3.29496	0.476398	0.0410831	Down
AI890299	Hs.268668 /// Hs.734526 /// Hs.738650 /// Hs.740204 /// Hs.745113	144108	gb:AI890299 /DB_XREF=gi:5595463 /DB_XREF=wm83c07.x1 /CLONE=IMAGE:2442540 /FEA=EST /CNT=14 /TID=Hs.44425.0 /TIER=Stack /STK=9 /UG=Hs.44425 /UG_TITLE=ESTs	SPT2, Suppressor of Ty, domain containing 1 (S. cerevisiae)	SPTY2D1	chr11p15.1	NP_919261	NM_194285	5.73831	6.08806	6.47051	4.40426	4.52441	5.78758	0.473253	0.0455293	Down
BC016183	Hs.368264 /// Hs.598749 /// Hs.613375 /// Hs.679341	5527	gb:BC016183.1 /DB_XREF=gi:16740598 /TID=Hs2.171734.2 /CNT=3 /FEA=FLmRNA /TIER=FL /STK=2 /LL=5527 /UG_GENE=PPP2R5C /UG=Hs.171734 /DEF=Homo sapiens, Similar to protein phosphatase 2, regulatory subunit B (B56), gamma isoform, clone MGC:23064 IMAGE:4855950, mRNA, complete cds. /PROD=Similar to protein phosphatase 2, regulatorysubunit B (B56), gamma isoform /FL=gb:BC016183.1	protein phosphatase 2, regulatory subunit B', gamma	PPP2R5C	chr14q32.31	NP_001155197 /// NP_001155198 /// NP_002710 /// NP_848701 /// NP_848702	NM_001161725 /// NM_001161726 /// NM_002719 /// NM_178586 /// NM_178587 /// NM_178588	3.77217	3.27724	3.12225	2.28511	2.60592	2.06745	0.472577	0.0451444	Down
NM_000491	Hs.8986	713	gb:NM_000491.2 /DB_XREF=gi:11038661 /GEN=C1QB /FEA=FLmRNA /CNT=135 /TID=Hs.8986.0 /TIER=FL+Stack /STK=16 /UG=Hs.8986 /LL=713 /DEF=Homo sapiens complement component 1, q subcomponent, beta polypeptide (C1QB), mRNA. /PROD=complement component 1, q subcomponent, betapolypeptide precursor /FL=gb:NM_000491.2	complement component 1, q subcomponent, B chain	C1QB	chr1p36.12	NP_000482	NM_000491	6.62444	8.10862	8.08266	5.4421	7.17592	6.85043	0.469927	0.00682541	Down
AL110236	Hs.535319	58487	gb:AL110236.1 /DB_XREF=gi:5817178 /FEA=mRNA /CNT=90 /TID=Hs.321022.0 /TIER=ConsEnd /STK=2 /UG=Hs.321022 /UG_TITLE=Homo sapiens mRNA; cDNA DKFZp566P1124 (from clone DKFZp566P1124) /DEF=Homo sapiens mRNA; cDNA DKFZp566P1124 (from clone DKFZp566P1124).	CREB/ATF bZIP transcription factor	CREBZF	chr11q14	NP_001034707	NM_001039618 /// NM_021212 /// NR_028024 /// NR_028025 /// NR_028026 /// NR_028027	5.25836	5.51981	6.24004	3.73655	4.21445	5.42821	0.469203	0.0287124	Down
AI167164	Hs.347187	8776	gb:AI167164 /DB_XREF=gi:3700334 /DB_XREF=oo08c10.x1 /CLONE=IMAGE:1565586 /FEA=mRNA /CNT=38 /TID=Hs.23200.1 /TIER=Stack /STK=8 /UG=Hs.23200 /LL=8776 /UG_GENE=MTMR1 /UG_TITLE=myotubularin related protein 1	myotubularin related protein 1	MTMR1	chrXq28	NP_003819	NM_003828 /// NM_176789	7.09184	8.23904	9.16937	6.01217	7.21716	8.0115	0.464725	0.00131296	Down
AL137651	Hs.610548 /// Hs.634058	91355	gb:AL137651.1 /DB_XREF=gi:6807717 /GEN=DKFZp434O0213 /FEA=mRNA /CNT=11 /TID=Hs.272317.0 /TIER=ConsEnd /STK=0 /UG=Hs.272317 /DEF=Homo sapiens mRNA; cDNA DKFZp434O0213 (from clone DKFZp434O0213); partial cds. /PROD=hypothetical protein	low density lipoprotein receptor-related protein 5-like	LRP5L	chr22q11.23	NP_001129244 /// NP_872298	NM_001135772 /// NM_182492	5.63208	5.06136	6.12276	4.38537	3.93161	5.11999	0.464625	0.00388766	Down
N90377	Hs.733517	---	gb:N90377 /DB_XREF=gi:1443704 /DB_XREF=za15d04.r1 /CLONE=IMAGE:292615 /FEA=EST /CNT=6 /TID=Hs.163615.0 /TIER=ConsEnd /STK=0 /UG=Hs.163615 /UG_TITLE=ESTs	---	---	---	---	---	7.3824	8.11624	7.98929	6.05308	7.00731	6.97378	0.459231	0.00646636	Down
BE893995	Hs.120170	---	gb:BE893995 /DB_XREF=gi:10355922 /DB_XREF=601437786F1 /CLONE=IMAGE:3922724 /FEA=EST /CNT=39 /TID=Hs.31447.0 /TIER=ConsEnd /STK=0 /UG=Hs.31447 /UG_TITLE=ESTs	---	---	---	---	---	5.74033	7.16894	5.89018	4.54571	5.86787	5.16775	0.458571	0.0263947	Down
AK022211	---	---	gb:AK022211.1 /DB_XREF=gi:10433557 /FEA=mRNA /CNT=5 /TID=Hs.203349.0 /TIER=ConsEnd /STK=0 /UG=Hs.203349 /UG_TITLE=Homo sapiens cDNA FLJ12149 fis, clone MAMMA1000421 /DEF=Homo sapiens cDNA FLJ12149 fis, clone MAMMA1000421.	---	---	---	---	---	6.85033	7.27467	5.88769	5.55758	6.30344	4.62043	0.457376	0.00759763	Down
AK025217	Hs.677338	---	gb:AK025217.1 /DB_XREF=gi:10437685 /FEA=mRNA /CNT=8 /TID=Hs.38761.0 /TIER=ConsEnd /STK=1 /UG=Hs.38761 /UG_TITLE=Homo sapiens cDNA: FLJ21564 fis, clone COL06452 /DEF=Homo sapiens cDNA: FLJ21564 fis, clone COL06452.	---	---	---	---	---	6.71539	6.62799	6.16979	5.33353	5.47273	5.3582	0.45564	0.0213526	Down
NM_144709	Hs.368348 /// Hs.597326	150962	gb:NM_144709.1 /DB_XREF=gi:21389306 /TID=Hs2.112830.1 /CNT=6 /FEA=FLmRNA /TIER=FL /STK=1 /LL=150962 /UG_GENE=FLJ32312 /UG=Hs.112830 /UG_TITLE=hypothetical protein FLJ32312 /DEF=Homo sapiens hypothetical protein FLJ32312 (FLJ32312), mRNA. /FL=gb:NM_144709.1	pseudouridylate synthase 10	PUS10	chr2p16.1	NP_653310	NM_144709	4.75565	4.91068	5.08015	3.35897	3.3294	4.38551	0.453284	0.0453872	Down
AF077033	Hs.408452 /// Hs.590937 /// Hs.597523 /// Hs.637104	11056	gb:AF077033.1 /DB_XREF=gi:4689113 /FEA=FLmRNA /CNT=9 /TID=Hs.99423.0 /TIER=FL /STK=0 /UG=Hs.99423 /LL=11056 /UG_GENE=ROK1 /DEF=Homo sapiens putative ATP-dependent RNA helicase ROK1 mRNA, complete cds. /PROD=putative ATP-dependent RNA helicase ROK1 /FL=gb:AF077033.1	DEAD (Asp-Glu-Ala-Asp) box polypeptide 52	DDX52	chr17q21.1	NP_008941	NM_007010 /// NM_152300	5.07231	5.37738	4.86661	3.80607	4.13005	3.98262	0.453175	0.011849	Down
AI697340	Hs.569713 /// Hs.740198	90799	gb:AI697340 /DB_XREF=gi:4985240 /DB_XREF=tq18a08.x1 /CLONE=IMAGE:2209142 /FEA=EST /CNT=73 /TID=Hs.135265.1 /TIER=Stack /STK=35 /UG=Hs.135265 /UG_TITLE=Homo sapiens clone FLB8436 PRO2277 mRNA, complete cds	centrosomal protein 95kDa	CEP95	chr17q23.3	NP_612372	NM_138363	5.71956	6.22211	6.96577	3.89863	5.23615	5.9453	0.452652	0.0427947	Down
AK021457	Hs.435815 /// Hs.599329	55578	gb:AK021457.1 /DB_XREF=gi:10432649 /FEA=mRNA /CNT=1 /TID=Hs.306595.0 /TIER=ConsEnd /STK=0 /UG=Hs.306595 /UG_TITLE=Homo sapiens cDNA FLJ11395 fis, clone HEMBA1000594 /DEF=Homo sapiens cDNA FLJ11395 fis, clone HEMBA1000594.	suppressor of Ty 20 homolog (S. cerevisiae)	SUPT20H	chr13q13.3	NP_001014308 /// NP_001265409 /// NP_001265410 /// NP_001265411 /// NP_060039	NM_001014286 /// NM_001278480 /// NM_001278481 /// NM_001278482 /// NM_017569	4.65059	4.66134	5.25395	3.60694	3.37573	4.11734	0.450661	0.00370023	Down
AA770059	Hs.104661	23211	gb:AA770059 /DB_XREF=gi:2821297 /DB_XREF=zi18h01.s1 /CLONE=IMAGE:431185 /FEA=EST /CNT=6 /TID=Hs.119667.0 /TIER=ConsEnd /STK=4 /UG=Hs.119667 /UG_TITLE=ESTs	zinc finger CCCH-type containing 4	ZC3H4	chr19q13.32	NP_055983	NM_015168	5.24606	4.76264	6.33941	4.06045	4.06986	5.00852	0.44956	0.0310723	Down
AF090918	Hs.741415	414212	gb:AF090918.1 /DB_XREF=gi:6690205 /FEA=mRNA /CNT=9 /TID=Hs.31330.0 /TIER=ConsEnd /STK=0 /UG=Hs.31330 /UG_TITLE=Homo sapiens clone HQ0319 /DEF=Homo sapiens clone HQ0319.	glutamate dehydrogenase 1 pseudogene 7	GLUD1P7	chr10q11.22	---	NR_048574	6.41251	6.91659	7.75977	5.48405	5.71469	6.53015	0.448743	0.00728223	Down
AW664964	Hs.433791 /// Hs.619232	387914	gb:AW664964 /DB_XREF=gi:7457508 /DB_XREF=hi98e03.x1 /CLONE=IMAGE:2980348 /FEA=EST /CNT=13 /TID=Hs.128899.0 /TIER=Stack /STK=10 /UG=Hs.128899 /UG_TITLE=ESTs	shisa homolog 2 (Xenopus laevis)	SHISA2	chr13q12.13	NP_001007539	NM_001007538	5.1693	3.29038	6.06978	3.48544	2.39512	5.07629	0.444467	0.0407741	Down
AI510829	---	---	gb:AI510829 /DB_XREF=gi:4409734 /DB_XREF=ar67a06.x1 /CLONE=IMAGE:2127634 /FEA=EST /CNT=5 /TID=Hs.171011.0 /TIER=ConsEnd /STK=3 /UG=Hs.171011 /UG_TITLE=ESTs	---	---	---	---	---	4.62312	5.74827	5.66837	3.28003	4.87421	4.17084	0.441408	0.022162	Down
BC001003	Hs.434142	6756	gb:BC001003.2 /DB_XREF=gi:12803043 /FEA=FLmRNA /CNT=10 /TID=Hs.194759.0 /TIER=FL /STK=0 /UG=Hs.194759 /LL=6756 /UG_GENE=SSX1 /DEF=Homo sapiens, synovial sarcoma, X breakpoint 1, clone MGC:5162, mRNA, complete cds. /PROD=synovial sarcoma, X breakpoint 1 /FL=gb:BC001003.2 gb:NM_005635.1	synovial sarcoma, X breakpoint 1	SSX1	chrXp11.23	NP_005626	NM_005635	4.32142	4.07707	3.34715	2.9346	2.75057	2.66704	0.440546	0.037737	Down
BF109231	Hs.401954 /// Hs.595631 /// Hs.596778 /// Hs.659497 /// Hs.692183 /// Hs.706517	83857	gb:BF109231 /DB_XREF=gi:10938921 /DB_XREF=7l60c11.x1 /CLONE=IMAGE:3525884 /FEA=EST /CNT=60 /TID=Hs.10683.0 /TIER=Stack /STK=42 /UG=Hs.10683 /UG_TITLE=ESTs	transmembrane and tetratricopeptide repeat containing 1	TMTC1	chr12p11.22	NP_001180380 /// NP_787057	NM_001193451 /// NM_175861	3.40099	3.98229	4.16868	2.2833	2.86263	2.88476	0.44027	0.00219522	Down
BE964598	Hs.4866	284129	gb:BE964598 /DB_XREF=gi:11768082 /DB_XREF=601658524R1 /CLONE=IMAGE:3885940 /FEA=EST /CNT=41 /TID=Hs.4866.0 /TIER=Stack /STK=20 /UG=Hs.4866 /UG_TITLE=ESTs, Weakly similar to AF279265 1 putative anion transporter 1 (H.sapiens)	solute carrier family 26, member 11	SLC26A11	chr17q25.3	NP_001159819 /// NP_001159820 /// NP_001159821 /// NP_775897	NM_001166347 /// NM_001166348 /// NM_001166349 /// NM_173626	6.18566	6.43955	6.82328	4.29063	5.45685	5.78643	0.43502	0.0476477	Down
BE463838	Hs.62314	79991	gb:BE463838 /DB_XREF=gi:9509613 /DB_XREF=hy23f07.x1 /CLONE=IMAGE:3198181 /FEA=EST /CNT=25 /TID=Hs.62314.0 /TIER=Stack /STK=19 /UG=Hs.62314 /UG_TITLE=ESTs	oligonucleotide/oligosaccharide-binding fold containing 1	OBFC1	chr10q24.33	NP_079204	NM_024928	4.20868	3.93329	5.1672	2.99153	2.94961	3.86839	0.434489	0.00648794	Down
AF335278	Hs.98370	29785	gb:AF335278.1 /DB_XREF=gi:13161183 /GEN=CYP2S1 /FEA=FLmRNA /CNT=69 /TID=Hs.98370.0 /TIER=FL /STK=0 /UG=Hs.98370 /LL=29785 /DEF=Homo sapiens cytochrome P450 2S1 (CYP2S1) mRNA, complete cds. /PROD=cytochrome P450 2S1 /FL=gb:AF335278.1 gb:NM_030622.2	cytochrome P450, family 2, subfamily S, polypeptide 1	CYP2S1	chr19q13.1	NP_085125	NM_030622	6.96937	6.36776	6.42441	5.40028	5.51965	5.28963	0.43305	0.029933	Down
NM_024520	Hs.154494	79568	gb:NM_024520.1 /DB_XREF=gi:13375659 /GEN=FLJ22555 /FEA=FLmRNA /CNT=42 /TID=Hs.3592.0 /TIER=FL /STK=0 /UG=Hs.3592 /LL=79568 /DEF=Homo sapiens hypothetical protein FLJ22555 (FLJ22555), mRNA. /PROD=hypothetical protein FLJ22555 /FL=gb:NM_024520.1	chromosome 2 open reading frame 47	C2orf47	chr2q33.1	NP_078796	NM_024520	5.94243	6.96404	6.6749	4.02453	5.73778	5.78628	0.432642	0.0472164	Down
W93847	Hs.407152 /// Hs.686278	143662	gb:W93847 /DB_XREF=gi:1422970 /DB_XREF=zd97a07.s1 /CLONE=IMAGE:357396 /FEA=mRNA /CNT=89 /TID=Hs.24139.0 /TIER=Stack /STK=21 /UG=Hs.24139 /UG_TITLE=Homo sapiens cDNA: FLJ23137 fis, clone LNG08842	mucin 15, cell surface associated	MUC15	chr11p14.3	NP_001128563 /// NP_001128564 /// NP_663625	NM_001135091 /// NM_001135092 /// NM_145650	4.1605	4.30481	3.78952	3.27339	2.79292	2.47614	0.43057	0.0214721	Down
AI813634	---	---	gb:AI813634 /DB_XREF=gi:5424849 /DB_XREF=wj65a03.x1 /CLONE=IMAGE:2407660 /FEA=EST /CNT=8 /TID=Hs.326553.0 /TIER=ConsEnd /STK=6 /UG=Hs.326553 /LL=79335 /UG_GENE=OR2I2 /UG_TITLE=olfactory receptor, family 2, subfamily I, member 2	NULL /// olfactory receptor, family 2, subfamily I, member 1 pseudogene	OR2I1P /// OR2I1P	---	---	---	6.07071	7.24756	6.79588	4.63657	5.63218	6.08127	0.43047	0.0448522	Down
R61819	Hs.584947	---	gb:R61819 /DB_XREF=gi:832514 /DB_XREF=yh06d07.s1 /CLONE=IMAGE:42644 /FEA=EST /CNT=4 /TID=Hs.21757.0 /TIER=ConsEnd /STK=4 /UG=Hs.21757 /UG_TITLE=ESTs	---	---	---	---	---	4.16117	4.76989	5.22802	2.78199	4.03927	3.61168	0.430038	0.0425474	Down
NM_014905	Hs.116448 /// Hs.601314 /// Hs.607441 /// Hs.621752 /// Hs.624629	2744	gb:NM_014905.1 /DB_XREF=gi:7662327 /GEN=GLS /FEA=FLmRNA /CNT=140 /TID=Hs.239189.0 /TIER=FL+Stack /STK=52 /UG=Hs.239189 /LL=2744 /DEF=Homo sapiens glutaminase (GLS), mRNA. /PROD=glutaminase C /FL=gb:AF223943.1 gb:AF327434.1 gb:NM_014905.1 gb:AB020645.1 gb:AF097493.1	glutaminase	GLS	chr2q32-q34	NP_001243239 /// NP_055720	NM_001256310 /// NM_014905	7.00444	8.63838	9.91232	5.74011	7.69931	8.56065	0.428627	0.0110369	Down
AW189843	Hs.17518	91543	gb:AW189843 /DB_XREF=gi:6464323 /DB_XREF=xl09h05.x1 /CLONE=IMAGE:2675769 /FEA=EST /CNT=6 /TID=Hs.271530.0 /TIER=ConsEnd /STK=3 /UG=Hs.271530 /UG_TITLE=ESTs, Weakly similar to ALU7_HUMAN ALU SUBFAMILY SQ SEQUENCE CONTAMINATION WARNING ENTRY (H.sapiens)	radical S-adenosyl methionine domain containing 2	RSAD2	chr2p25.2	NP_542388	NM_080657	4.68646	5.04563	4.6512	3.51031	3.6819	3.50331	0.423915	0.00302206	Down
H82959	---	---	gb:H82959 /DB_XREF=gi:1061629 /DB_XREF=yq47a03.s1 /CLONE=IMAGE:198892 /FEA=EST /CNT=5 /TID=Hs.20289.0 /TIER=ConsEnd /STK=5 /UG=Hs.20289 /UG_TITLE=ESTs	---	---	---	---	---	6.25723	3.86366	3.53162	4.82036	3.01029	2.81157	0.422278	0.0449024	Down
NM_030791	Hs.24678	81537	gb:NM_030791.1 /DB_XREF=gi:13540568 /GEN=LOC81537 /FEA=FLmRNA /CNT=1 /TID=HsAffx.900063.54 /TIER=FL /STK=0 /DEF=Homo sapiens sphingosine-1-phosphatase (LOC81537), mRNA. /PROD=sphingosine-1-phosphatase /FL=gb:NM_030791.1	sphingosine-1-phosphate phosphatase 1	SGPP1	chr14q23.2	NP_110418	NM_030791	4.67057	4.81665	4.96577	3.29327	3.50084	3.87904	0.422116	0.00488767	Down
NM_018523	---	---	gb:NM_018523.1 /DB_XREF=gi:8924154 /GEN=PRO2325 /FEA=FLmRNA /CNT=2 /TID=Hs.31535.0 /TIER=FL /STK=0 /UG=Hs.31535 /LL=55393 /DEF=Homo sapiens hypothetical protein PRO2325 (PRO2325), mRNA. /PROD=hypothetical protein PRO2325 /FL=gb:AF119876.1 gb:NM_018523.1	---	---	---	---	---	6.23407	5.99867	6.43034	4.71018	4.66323	5.44715	0.421991	0.0149621	Down
BC043411	Hs.446446	---	gb:BC043411.1 /DB_XREF=gi:27694447 /TID=Hs2.438746.1 /CNT=7 /FEA=mRNA /TIER=ConsEnd /STK=0 /UG=Hs.438746 /UG_TITLE=Homo sapiens, clone IMAGE:6155889, mRNA /DEF=Homo sapiens, clone IMAGE:6155889, mRNA.	---	---	---	---	---	5.1276	6.86374	3.96552	4.04216	5.46396	3.26988	0.420593	0.0349708	Down
U15642	Hs.445758	1875	gb:U15642.1 /DB_XREF=gi:758415 /FEA=FLmRNA /CNT=51 /TID=Hs.2331.0 /TIER=FL /STK=0 /UG=Hs.2331 /LL=1875 /UG_GENE=E2F5 /DEF=Human transcription factor E2F-5 mRNA, complete cds. /PROD=E2F-5 /FL=gb:U15642.1 gb:NM_001951.2 gb:U31556.1	E2F transcription factor 5, p130-binding	E2F5	chr8q21.2	NP_001077057 /// NP_001077058 /// NP_001942	NM_001083588 /// NM_001083589 /// NM_001951	5.01065	5.52504	6.94591	4.37019	4.3672	5.43507	0.419603	0.0486996	Down
AK026829	Hs.200841	3908	gb:AK026829.1 /DB_XREF=gi:10439775 /FEA=mRNA /CNT=1 /TID=Hs.323511.1 /TIER=ConsEnd /STK=0 /UG=Hs.323511 /UG_TITLE=Homo sapiens cDNA: FLJ23176 fis, clone LNG10452 /DEF=Homo sapiens cDNA: FLJ23176 fis, clone LNG10452.	laminin, alpha 2	LAMA2	chr6q22-q23	NP_000417 /// NP_001073291	NM_000426 /// NM_001079823	5.24788	5.51783	5.24579	4.0916	4.44929	3.58743	0.41816	0.0195607	Down
BF508654	Hs.375766 /// Hs.713743	100190939	gb:BF508654 /DB_XREF=gi:11591952 /DB_XREF=UI-H-BI4-aop-c-02-0-UI.s1 /CLONE=IMAGE:3085443 /FEA=EST /CNT=18 /TID=Hs.167791.2 /TIER=Stack /STK=13 /UG=Hs.167791 /LL=5954 /UG_GENE=RCN1 /UG_TITLE=reticulocalbin 1, EF-hand calcium binding domain	TPT1 antisense RNA 1	TPT1-AS1	chr13q14.13	---	NR_024458	6.63526	6.98815	7.80143	5.1142	6.20924	6.30939	0.418147	0.0349435	Down
AA833832	Hs.649389 /// Hs.726427	729013	gb:AA833832 /DB_XREF=gi:2908600 /DB_XREF=od62c12.s1 /CLONE=IMAGE:1372534 /FEA=EST /CNT=34 /TID=Hs.34068.0 /TIER=ConsEnd /STK=5 /UG=Hs.34068 /UG_TITLE=ESTs	ZBED5 antisense RNA 1	ZBED5-AS1	chr11p15.3	---	NR_034137	5.26547	5.5995	5.10211	3.46811	4.40591	4.16843	0.41424	0.0361789	Down
NM_000107	Hs.700338	1643	gb:NM_000107.1 /DB_XREF=gi:4557514 /GEN=DDB2 /FEA=FLmRNA /CNT=100 /TID=Hs.77602.0 /TIER=FL+Stack /STK=53 /UG=Hs.77602 /LL=1643 /DEF=Homo sapiens damage-specific DNA binding protein 2 (48kD) (DDB2), mRNA. /PROD=damage-specific DNA binding protein 2 (48kD) /FL=gb:U18300.1 gb:BC000093.1 gb:NM_000107.1	damage-specific DNA binding protein 2, 48kDa	DDB2	chr11p12-p11	NP_000098	NM_000107	6.48366	5.17381	5.95315	4.87472	4.47166	4.67212	0.410682	0.0456816	Down
NM_002372	Hs.432822 /// Hs.599751 /// Hs.644717	4124	gb:NM_002372.1 /DB_XREF=gi:4758697 /GEN=MAN2A1 /FEA=FLmRNA /CNT=45 /TID=Hs.32965.0 /TIER=FL+Stack /STK=17 /UG=Hs.32965 /LL=4124 /DEF=Homo sapiens mannosidase, alpha, class 2A, member 1 (MAN2A1), mRNA. /PROD=mannosidase, alpha, class 2A, member 1 /FL=gb:NM_002372.1 gb:U31520.1 gb:D63998.1	mannosidase, alpha, class 2A, member 1	MAN2A1	chr5q21-q22	NP_002363	NM_002372	4.87202	5.92743	4.97504	4.06333	4.36239	3.65859	0.410504	0.0312151	Down
AV702787	Hs.686190	---	gb:AV702787 /DB_XREF=gi:10719117 /DB_XREF=AV702787 /CLONE=ADBAGG03 /TID=Hs2.378432.2 /CNT=4 /FEA=mRNA /TIER=ConsEnd /STK=0 /UG=Hs.378432 /UG_TITLE=Homo sapiens, clone IMAGE:4732650, mRNA	---	---	---	---	---	5.2041	5.19949	6.13401	3.62084	3.77258	5.03774	0.40891	0.0108199	Down
AA412283	Hs.662177	---	gb:AA412283 /DB_XREF=gi:2070854 /DB_XREF=zu10f05.s1 /CLONE=IMAGE:731457 /FEA=EST /CNT=7 /TID=Hs.97111.0 /TIER=ConsEnd /STK=2 /UG=Hs.97111 /UG_TITLE=ESTs, Weakly similar to ALU7_HUMAN ALU SUBFAMILY SQ SEQUENCE CONTAMINATION WARNING ENTRY (H.sapiens)	---	---	---	---	---	4.32727	5.31744	4.84542	3.41174	3.73692	3.60447	0.40743	0.0229385	Down
NM_016931	Hs.371036 /// Hs.591995	50507	gb:NM_016931.1 /DB_XREF=gi:8393842 /GEN=NOX4 /FEA=FLmRNA /CNT=28 /TID=Hs.93847.0 /TIER=FL+Stack /STK=11 /UG=Hs.93847 /LL=50507 /DEF=Homo sapiens NADPH oxidase 4 (NOX4), mRNA. /PROD=NADPH oxidase 4 /FL=gb:AF261943.1 gb:NM_016931.1 gb:AF254621.1 gb:AB041035.1	NADPH oxidase 4	NOX4	chr11q14.2-q21	NP_001137308 /// NP_001137309 /// NP_058627	NM_001143836 /// NM_001143837 /// NM_016931 /// NR_026571	4.89497	3.90237	4.0662	3.34806	3.07756	2.63212	0.403922	0.0298617	Down
NM_014672	Hs.458487	9692	gb:NM_014672.1 /DB_XREF=gi:7662093 /GEN=KIAA0391 /FEA=FLmRNA /CNT=131 /TID=Hs.154668.0 /TIER=FL /STK=0 /UG=Hs.154668 /LL=9692 /DEF=Homo sapiens KIAA0391 gene product (KIAA0391), mRNA. /PROD=KIAA0391 gene product /FL=gb:AB002389.1 gb:NM_014672.1	KIAA0391	KIAA0391	chr14q13.2	NP_001243607 /// NP_001243608 /// NP_001243609 /// NP_001243610 /// NP_055487	NM_001256678 /// NM_001256679 /// NM_001256680 /// NM_001256681 /// NM_014672	6.47938	7.00051	6.70187	5.36024	5.25641	5.63476	0.401359	0.0264748	Down
BI599409	Hs.679444	---	gb:BI599409 /DB_XREF=gi:15492348 /DB_XREF=603246066F1 /CLONE=IMAGE:5288392 /TID=Hs2.382364.1 /CNT=5 /FEA=mRNA /TIER=ConsEnd /STK=0 /UG=Hs.382364 /UG_TITLE=Homo sapiens, clone IMAGE:5288392, mRNA	---	---	---	---	---	4.12386	5.11758	4.53752	2.89198	3.2631	3.71765	0.400388	0.0494203	Down
L14611	Hs.560343 /// Hs.625932 /// Hs.691779 /// Hs.718317	6095	gb:L14611.1 /DB_XREF=gi:348240 /FEA=FLmRNA /CNT=8 /TID=Hs.2156.0 /TIER=FL /STK=0 /UG=Hs.2156 /LL=6095 /UG_GENE=RORA /DEF=Human transcription factor RZR-alpha mRNA, complete cds. /PROD=transcription factor /FL=gb:L14611.1 gb:U04899.1 gb:NM_002943.1	RAR-related orphan receptor A	RORA	chr15q22.2	NP_002934 /// NP_599022 /// NP_599023 /// NP_599024	NM_002943 /// NM_134260 /// NM_134261 /// NM_134262	4.69088	6.85961	6.17346	2.87085	5.30449	5.27061	0.398983	0.0346365	Down
AW007751	Hs.74647	10730	gb:AW007751 /DB_XREF=gi:5856529 /DB_XREF=wt68f10.x1 /CLONE=IMAGE:2512651 /FEA=mRNA /CNT=27 /TID=Hs.2014.1 /TIER=Stack /STK=11 /UG=Hs.2014 /LL=6964 /UG_GENE=TRD@ /UG_TITLE=T cell receptor delta locus	YME1-like 1 ATPase	YME1L1	chr10p14	NP_001240795 /// NP_055078 /// NP_647473	NM_001253866 /// NM_014263 /// NM_139312 /// NM_139313	4.7519	5.7666	4.48091	3.34979	4.11129	3.77271	0.396725	0.0472902	Down
BE676062	Hs.643560	23334	gb:BE676062 /DB_XREF=gi:10036603 /DB_XREF=7f21c04.x1 /CLONE=IMAGE:3295302 /FEA=EST /CNT=8 /TID=Hs.321669.2 /TIER=Stack /STK=8 /UG=Hs.321669 /LL=81888 /UG_TITLE=Homo sapiens HT036 (HT036) mRNA, complete cds	seizure threshold 2 homolog (mouse)	SZT2	chr1p34.2	NP_056099	NM_001012960 /// NM_001012961 /// NM_015284 /// NM_182518	7.57517	7.18034	6.9523	5.86485	5.88432	5.99251	0.393866	0.0259107	Down
AI123233	Hs.167496 /// Hs.732683	26953	gb:AI123233 /DB_XREF=gi:3538999 /DB_XREF=qa47e04.x1 /CLONE=IMAGE:1689918 /FEA=mRNA /CNT=72 /TID=Hs.167496.0 /TIER=Stack /STK=34 /UG=Hs.167496 /LL=26953 /UG_GENE=RANBP6 /UG_TITLE=RAN binding protein 6	RAN binding protein 6	RANBP6	chr9p24.1	NP_001230131 /// NP_001230132 /// NP_036548	NM_001243202 /// NM_001243203 /// NM_012416	6.0899	7.25987	7.41148	5.13741	5.59474	6.14232	0.393641	0.024394	Down
NM_016938	Hs.731454	30008	gb:NM_016938.1 /DB_XREF=gi:8393298 /GEN=EFEMP2 /FEA=FLmRNA /CNT=16 /TID=Hs.6059.0 /TIER=FL+Stack /STK=10 /UG=Hs.6059 /LL=30008 /DEF=Homo sapiens EGF-containing fibulin-like extracellular matrix protein 2 (EFEMP2), mRNA. /PROD=EGF-containing fibulin-like extracellular matrixprotein 2 /FL=gb:NM_016938.1 gb:AF093119.1 gb:AF109121.1	EGF containing fibulin-like extracellular matrix protein 2	EFEMP2	chr11q13.1	NP_058634	NM_016938 /// NR_037718	7.54327	8.23315	6.61638	5.49606	7.1418	5.41981	0.391361	0.0411653	Down
S65921	Mm.333124	243469	gb:S65921.1 /DB_XREF=gi:425519 /GEN=anti-colorectal carcinoma light chain /FEA=mRNA /CNT=5 /TID=Hs.103996.0 /TIER=ConsEnd /STK=0 /UG=Hs.103996 /DEF=anti-colorectal carcinoma light chain=glycoprotein CANAG-50 specific IgG1 kappa (human, 19.9 hybridoma, antibody 1116NS19.9, mRNA, 998 nt). /PROD=anti-colorectal carcinoma light chain	immunoglobulin kappa chain complex	Igk	chr6 C1|6 30.89 cM	---	---	3.93962	4.49898	4.11222	2.60188	3.0897	2.80005	0.390022	0.000461025	Down
AA806368	Hs.271955	---	gb:AA806368 /DB_XREF=gi:2875118 /DB_XREF=oc22e04.s1 /CLONE=IMAGE:1350462 /FEA=EST /CNT=3 /TID=Hs.272159.0 /TIER=ConsEnd /STK=3 /UG=Hs.272159 /UG_TITLE=ESTs, Weakly similar to ALU5_HUMAN ALU SUBFAMILY SC SEQUENCE CONTAMINATION WARNING ENTRY (H.sapiens)	---	---	---	---	---	4.95104	7.03483	6.59185	3.85189	5.32005	5.53554	0.389798	0.0261249	Down
NM_017596	Hs.169182	23046	gb:NM_017596.1 /DB_XREF=gi:8922142 /GEN=KIAA0449 /FEA=FLmRNA /CNT=65 /TID=Hs.169182.0 /TIER=FL+Stack /STK=17 /UG=Hs.169182 /LL=23046 /DEF=Homo sapiens KIAA0449 protein (KIAA0449), mRNA. /PROD=hypothetical protein DKFZp434J212 /FL=gb:NM_017596.1	kinesin family member 21B	KIF21B	chr1q32.1	NP_001239029 /// NP_001239031 /// NP_001239032 /// NP_060066	NM_001252100 /// NM_001252102 /// NM_001252103 /// NM_017596	6.05096	6.57789	5.13407	4.56176	5.12168	4.16626	0.387856	0.0162926	Down
BC017576	Hs.643560	23334	gb:BC017576.1 /DB_XREF=gi:19173812 /TID=Hs2.397063.1 /CNT=3 /FEA=mRNA /TIER=ConsEnd /STK=0 /UG=Hs.397063 /UG_TITLE=Homo sapiens, clone IMAGE:4092807, mRNA /DEF=Homo sapiens, clone IMAGE:4092807, mRNA.	seizure threshold 2 homolog (mouse)	SZT2	chr1p34.2	NP_056099	NM_001012960 /// NM_001012961 /// NM_015284 /// NM_182518	4.96184	5.69696	6.8835	4.17187	4.03192	5.44655	0.387804	0.0384714	Down
AI810244	Hs.488173 /// Hs.605175	196383	gb:AI810244 /DB_XREF=gi:5396810 /DB_XREF=wb86f06.x1 /CLONE=IMAGE:2312579 /FEA=EST /CNT=20 /TID=Hs.50535.0 /TIER=Stack /STK=14 /UG=Hs.50535 /UG_TITLE=ESTs	Rab interacting lysosomal protein-like 2	RILPL2	chr12q24.31	NP_659495	NM_145058	6.38116	7.44091	7.82421	5.54253	5.76917	6.43119	0.38748	0.0336346	Down
NM_007219	Hs.589884	11237	gb:NM_007219.2 /DB_XREF=gi:10518498 /GEN=RNF24 /FEA=FLmRNA /CNT=67 /TID=Hs.30524.0 /TIER=FL+Stack /STK=19 /UG=Hs.30524 /LL=11237 /DEF=Homo sapiens ring finger protein 24 (RNF24), mRNA. /PROD=ring finger protein 24 /FL=gb:NM_007219.2 gb:AF151081.1	ring finger protein 24	RNF24	chr20p13	NP_001127809 /// NP_001127810 /// NP_009150	NM_001134337 /// NM_001134338 /// NM_007219	5.12959	6.80024	6.45904	3.7642	5.64604	4.72985	0.384754	0.0137686	Down
BC000607	Hs.534456	51529	gb:BC000607.1 /DB_XREF=gi:12653650 /FEA=FLmRNA /CNT=6 /TID=Hs.183180.1 /TIER=FL /STK=0 /UG=Hs.183180 /LL=51529 /UG_GENE=ANAPC11 /DEF=Homo sapiens, clone MGC:882, mRNA, complete cds. /PROD=Unknown (protein for MGC:882) /FL=gb:BC000607.1	anaphase promoting complex subunit 11	ANAPC11	chr17q25.3	NP_001002244 /// NP_001002245 /// NP_001002246 /// NP_001002247 /// NP_001002248 /// NP_001002249 /// NP_057560	NM_001002244 /// NM_001002245 /// NM_001002246 /// NM_001002247 /// NM_001002248 /// NM_001002249 /// NM_016476	6.13176	5.06211	3.73552	4.69425	3.44205	3.00494	0.38327	0.0431754	Down
AA582932	Hs.512492	376267	Cluster Incl. AA582932:nn80a11.s1 Homo sapiens cDNA, 3 end /clone=IMAGE-1090172 /clone_end=3' /gb=AA582932 /gi=2360292 /ug=Hs.21349 /len=614	RAB15, member RAS oncogene family	RAB15	chr14q23.3	NP_941959	NM_198686	6.38207	6.01325	6.26295	4.802	5.00827	4.68837	0.38197	0.018412	Down
AI828036	---	26137	gb:AI828036 /DB_XREF=gi:5448628 /DB_XREF=wf12h10.x1 /CLONE=IMAGE:2350435 /FEA=EST /CNT=3 /TID=Hs.256280.0 /TIER=ConsEnd /STK=3 /UG=Hs.256280 /UG_TITLE=ESTs	zinc finger and BTB domain containing 20	ZBTB20	chr3q13.2	NP_001157814 /// NP_001157815 /// NP_001157816 /// NP_001157817 /// NP_001157818 /// NP_001157819 /// NP_056457	NM_001164342 /// NM_001164343 /// NM_001164344 /// NM_001164345 /// NM_001164346 /// NM_001164347 /// NM_015642	6.01302	5.52108	4.42518	4.34432	4.26422	3.35049	0.376774	0.0169223	Down
NM_016201	Hs.426312	51421	gb:NM_016201.1 /DB_XREF=gi:7705577 /GEN=LCCP /FEA=FLmRNA /CNT=133 /TID=Hs.92186.0 /TIER=FL+Stack /STK=30 /UG=Hs.92186 /LL=51421 /DEF=Homo sapiens Leman coiled-coil protein (LCCP), mRNA. /PROD=Leman coiled-coil protein /FL=gb:NM_016201.1 gb:AF175966.1	angiomotin like 2	AMOTL2	chr3q21-q22	NP_057285	NM_016201	4.60628	9.77444	6.09697	3.87672	8.33037	4.81034	0.376447	0.0335467	Down
NM_006187	Hs.528634 /// Hs.744211	4940	gb:NM_006187.1 /DB_XREF=gi:5453823 /GEN=OAS3 /FEA=FLmRNA /CNT=107 /TID=Hs.56009.0 /TIER=FL /STK=0 /UG=Hs.56009 /LL=4940 /DEF=Homo sapiens 2-5oligoadenylate synthetase 3 (OAS3), mRNA. /PROD=2-5oligoadenylate synthetase 3 /FL=gb:NM_006187.1 gb:AF063613.1 gb:AB044545.1	2'-5'-oligoadenylate synthetase 3, 100kDa	OAS3	chr12q24.2	NP_006178	NM_006187	5.84385	6.9388	7.95438	4.55851	5.16172	6.65876	0.374631	0.0122425	Down
BE464337	Hs.86045	54954	gb:BE464337 /DB_XREF=gi:9510112 /DB_XREF=hx88d12.x1 /CLONE=IMAGE:3194903 /FEA=EST /CNT=14 /TID=Hs.86045.0 /TIER=Stack /STK=13 /UG=Hs.86045 /UG_TITLE=ESTs	family with sequence similarity 120C	FAM120C	chrXp11.22	NP_060318 /// NP_940858	NM_017848 /// NM_198456	5.74769	5.27895	6.62797	4.023	4.16434	5.20232	0.370857	0.0150033	Down
NM_014652	Hs.158497	9670	gb:NM_014652.1 /DB_XREF=gi:7662265 /GEN=KIAA0724 /FEA=FLmRNA /CNT=109 /TID=Hs.158497.0 /TIER=FL+Stack /STK=20 /UG=Hs.158497 /LL=9670 /DEF=Homo sapiens KIAA0724 gene product (KIAA0724), mRNA. /PROD=KIAA0724 gene product /FL=gb:AB018267.1 gb:NM_014652.1 gb:AF267987.1	importin 13	IPO13	chr1p34.1	NP_055467 /// XP_003846672	NM_014652 /// XM_003846624	5.70367	6.34448	6.89844	4.51581	4.45496	5.60662	0.370176	0.0218005	Down
AF131805	Hs.655765	---	gb:AF131805.1 /DB_XREF=gi:4406637 /FEA=mRNA /CNT=3 /TID=Hs.13544.0 /TIER=ConsEnd /STK=0 /UG=Hs.13544 /UG_TITLE=Homo sapiens clone 24850 mRNA sequence /DEF=Homo sapiens clone 24850 mRNA sequence.	---	---	---	---	---	5.04962	4.88335	5.10986	4.00312	3.32089	3.31224	0.370093	0.0220545	Down
AU150078	Hs.634209	---	gb:AU150078 /DB_XREF=gi:11011599 /DB_XREF=AU150078 /CLONE=NT2RP2001444 /FEA=EST /CNT=5 /TID=Hs.97343.0 /TIER=ConsEnd /STK=5 /UG=Hs.97343 /UG_TITLE=ESTs	---	---	---	---	---	3.64422	4.44076	4.58337	2.83625	2.81968	2.85888	0.368703	0.0411318	Down
W87523	Hs.449601	96610	gb:W87523 /DB_XREF=gi:1401729 /DB_XREF=zh67f12.s1 /CLONE=IMAGE:417167 /FEA=EST /CNT=37 /TID=Hs.10848.2 /TIER=Stack /STK=20 /UG=Hs.10848 /LL=9790 /UG_GENE=KIAA0187 /UG_TITLE=KIAA0187 gene product	BMS1 homolog, ribosome assembly protein (yeast) pseudogene	LOC96610	chr22q11.22	---	NM_080926 /// NR_027293	5.84577	6.6046	7.10059	4.98689	4.79852	5.57554	0.367128	0.038141	Down
N63576	Hs.495710 /// Hs.618017 /// Hs.732644	2824	gb:N63576 /DB_XREF=gi:1211405 /DB_XREF=yy63f07.s1 /CLONE=IMAGE:278245 /FEA=FLmRNA /CNT=208 /TID=Hs.5422.0 /TIER=Stack /STK=21 /UG=Hs.5422 /LL=2824 /UG_GENE=GPM6B /UG_TITLE=glycoprotein M6B /FL=gb:AF016004.1	glycoprotein M6B	GPM6B	chrXp22.2	NP_001001994 /// NP_001001995 /// NP_001001996 /// NP_005269	NM_001001994 /// NM_001001995 /// NM_001001996 /// NM_005278	6.62964	7.19479	6.53055	4.91167	5.45884	5.61909	0.36462	0.0331834	Down
AI869306	Hs.591212	100499466	gb:AI869306 /DB_XREF=gi:5543274 /DB_XREF=wl68e05.x1 /CLONE=IMAGE:2430080 /FEA=EST /CNT=96 /TID=Hs.190488.1 /TIER=ConsEnd /STK=2 /UG=Hs.190488 /LL=55073 /UG_GENE=FLJ10120 /UG_TITLE=hypothetical protein FLJ10120	long intergenic non-protein coding RNA 674	LINC00674	chr17q24.2	---	NR_027418	7.93688	7.08232	7.8971	6.74277	4.83632	6.44854	0.360302	0.03579	Down
AA223204	---	---	gb:AA223204 /DB_XREF=gi:1843755 /DB_XREF=zr06c05.s1 /CLONE=IMAGE:650696 /FEA=EST /CNT=3 /TID=Hs.186898.0 /TIER=ConsEnd /STK=3 /UG=Hs.186898 /UG_TITLE=ESTs	---	---	---	---	---	6.03311	5.61569	6.49788	4.15909	4.56909	4.99818	0.359023	0.0253601	Down
NM_018222	Hs.432914 /// Hs.623587	55742	gb:NM_018222.1 /DB_XREF=gi:8922672 /GEN=PARVA /FEA=FLmRNA /CNT=208 /TID=Hs.44077.0 /TIER=FL+Stack /STK=35 /UG=Hs.44077 /LL=55742 /DEF=Homo sapiens alpha-parvin (PARVA), mRNA. /PROD=alpha-parvin /FL=gb:NM_018222.1 gb:AF237771.1	parvin, alpha	PARVA	chr11p15.3	NP_060692	NM_018222	5.25184	6.30166	6.43909	3.07619	5.19371	4.79663	0.357414	0.033474	Down
AK095283	Hs.132648	284486	gb:AK095283.1 /DB_XREF=gi:21754510 /TID=Hs2.132648.1 /CNT=2 /FEA=mRNA /TIER=ConsEnd /STK=0 /UG=Hs.132648 /UG_TITLE=Homo sapiens cDNA FLJ37964 fis, clone CTONG2009766. /DEF=Homo sapiens cDNA FLJ37964 fis, clone CTONG2009766.	thioesterase superfamily member 5	THEM5	chr1q21.3	NP_872384	NM_182578	4.65409	5.36228	5.11153	3.42584	3.45704	3.83808	0.357141	0.0214198	Down
NM_005748	Hs.617142 /// Hs.649195 /// Hs.708084	10138	gb:NM_005748.1 /DB_XREF=gi:5032228 /GEN=YAF2 /FEA=FLmRNA /CNT=12 /TID=Hs.180324.0 /TIER=FL /STK=0 /UG=Hs.180324 /LL=10138 /DEF=Homo sapiens YY1-associated factor 2 (YAF2), mRNA. /PROD=YY1-associated factor 2 /FL=gb:NM_005748.1	YY1 associated factor 2	YAF2	chr12q12	NP_001177906 /// NP_001177908 /// NP_001177909 /// NP_005739	NM_001012424 /// NM_001190977 /// NM_001190979 /// NM_001190980 /// NM_005748 /// NR_034000	4.25064	6.61241	7.13739	3.12138	4.49868	5.91209	0.355207	0.0415313	Down
AF212246	Hs.310536 /// Hs.609335 /// Hs.610708	55869	gb:AF212246.1 /DB_XREF=gi:13182768 /FEA=FLmRNA /CNT=5 /TID=Hs.112272.0 /TIER=FL /STK=0 /UG=Hs.112272 /LL=55869 /UG_GENE=HDAC8 /DEF=Homo sapiens CDA07 mRNA, complete cds. /PROD=CDA07 /FL=gb:AF212246.1	histone deacetylase 8	HDAC8	chrXq13	NP_001159890 /// NP_001159891 /// NP_001159892 /// NP_001159894 /// NP_001159920 /// NP_060956	NM_001166418 /// NM_001166419 /// NM_001166420 /// NM_001166422 /// NM_001166448 /// NM_018486 /// NR_051952	4.18001	6.75788	6.44016	3.31422	4.87436	5.14835	0.350607	0.0447898	Down
NM_001055	Hs.567342 /// Hs.716834 /// Hs.736805	6817	gb:NM_001055.1 /DB_XREF=gi:4507300 /GEN=SULT1A1 /FEA=FLmRNA /CNT=87 /TID=Hs.142.0 /TIER=FL+Stack /STK=23 /UG=Hs.142 /LL=6817 /DEF=Homo sapiens sulfotransferase family, cytosolic, 1A, phenol-preferring, member 1 (SULT1A1), mRNA. /PROD=sulfotransferase family, cytosolic, 1A,phenol-preferring, member 1 /FL=gb:L19955.1 gb:NM_001055.1 gb:L19999.1 gb:L10819.1 gb:U09031.1 gb:BC000923.2 gb:U26309.1	sulfotransferase family, cytosolic, 1A, phenol-preferring, member 1	SULT1A1	chr16p12.1	NP_001046 /// NP_803565 /// NP_803566 /// NP_803878 /// NP_803880	NM_001055 /// NM_177529 /// NM_177530 /// NM_177534 /// NM_177536	7.20724	8.2472	7.28311	5.87999	6.56821	5.85096	0.348224	0.00492951	Down
AK021981	Hs.677078	---	gb:AK021981.1 /DB_XREF=gi:10433290 /FEA=mRNA /CNT=2 /TID=Hs.193525.0 /TIER=ConsEnd /STK=0 /UG=Hs.193525 /UG_TITLE=Homo sapiens cDNA FLJ11919 fis, clone HEMBB1000274 /DEF=Homo sapiens cDNA FLJ11919 fis, clone HEMBB1000274.	---	---	---	---	---	5.69451	6.78288	6.14512	4.3752	4.73312	5.0486	0.345737	0.03543	Down
AA045257	Hs.323489 /// Hs.623885	55037	gb:AA045257 /DB_XREF=gi:1523461 /DB_XREF=zf11e11.s1 /CLONE=IMAGE:376652 /FEA=EST /CNT=17 /TID=Hs.7790.0 /TIER=Stack /STK=14 /UG=Hs.7790 /UG_TITLE=ESTs	pentatricopeptide repeat domain 3	PTCD3	chr2p11.2	NP_060422	NM_017952	6.70878	6.42151	7.27719	4.64408	5.3186	5.70972	0.33942	0.0295879	Down
NM_017523	Hs.441975	54739	gb:NM_017523.1 /DB_XREF=gi:8923794 /GEN=HSXIAPAF1 /FEA=FLmRNA /CNT=14 /TID=Hs.139262.0 /TIER=FL /STK=1 /UG=Hs.139262 /LL=54739 /DEF=Homo sapiens XIAP associated factor-1 (HSXIAPAF1), mRNA. /PROD=XIAP associated factor-1 /FL=gb:NM_017523.1	XIAP associated factor 1	XAF1	chr17p13.1	NP_059993 /// NP_954590	NM_017523 /// NM_199139 /// NR_046396 /// NR_046397 /// NR_046398	6.76032	8.34276	8.57473	5.24249	6.09935	7.40917	0.339405	0.035363	Down
BC000873	Hs.173030 /// Hs.639225	59345	gb:BC000873.1 /DB_XREF=gi:12654118 /FEA=FLmRNA /CNT=41 /TID=Hs.172654.0 /TIER=FL /STK=0 /UG=Hs.172654 /LL=59345 /UG_GENE=GNB4 /DEF=Homo sapiens, guanine nucleotide binding protein beta subunit 4, clone MGC:5262, mRNA, complete cds. /PROD=guanine nucleotide binding protein beta subunit4 /FL=gb:BC000873.1 gb:AF300648.1 gb:NM_021629.1	guanine nucleotide binding protein (G protein), beta polypeptide 4	GNB4	chr3q26.33	NP_067642	NM_021629	6.44084	6.75481	6.17562	4.76743	4.99455	4.9479	0.336812	0.0110837	Down
AK074468	Hs.681795	---	gb:AK074468.1 /DB_XREF=gi:18677080 /TID=Hs2.352646.1 /CNT=1 /FEA=mRNA /TIER=ConsEnd /STK=0 /UG=Hs.352646 /UG_TITLE=Homo sapiens cDNA FLJ23888 fis, clone LNG14336. /DEF=Homo sapiens cDNA FLJ23888 fis, clone LNG14336.	---	---	---	---	---	7.19514	7.40391	7.83032	5.15351	6.23641	6.16422	0.33617	0.0234213	Down
AK021880	Hs.688020	---	gb:AK021880.1 /DB_XREF=gi:10433166 /FEA=mRNA /CNT=1 /TID=Hs.296665.0 /TIER=ConsEnd /STK=0 /UG=Hs.296665 /UG_TITLE=Homo sapiens cDNA FLJ11818 fis, clone HEMBA1006424 /DEF=Homo sapiens cDNA FLJ11818 fis, clone HEMBA1006424.	---	---	---	---	---	4.67992	4.51534	5.73131	2.91442	3.4685	3.9461	0.334772	0.0242137	Down
BC004277	Hs.513126	55215	gb:BC004277.1 /DB_XREF=gi:13279100 /FEA=FLmRNA /CNT=9 /TID=Hs.134734.0 /TIER=FL /STK=0 /UG=Hs.134734 /DEF=Homo sapiens, Similar to hypothetical protein FLJ10719, clone MGC:10837, mRNA, complete cds. /PROD=Similar to hypothetical protein FLJ10719 /FL=gb:BC004277.1	Fanconi anemia, complementation group I	FANCI	chr15q26.1	NP_001106849 /// NP_060663	NM_001113378 /// NM_018193	4.11297	4.2423	5.61688	2.85712	2.48877	3.96582	0.333917	0.00940438	Down
NM_014563	Hs.592238 /// Hs.622292 /// Hs.630805 /// Hs.634785	6399	gb:NM_014563.1 /DB_XREF=gi:7657547 /GEN=SEDL /FEA=FLmRNA /CNT=54 /TID=Hs.174038.0 /TIER=FL+Stack /STK=30 /UG=Hs.174038 /LL=6399 /DEF=Homo sapiens spondyloepiphyseal dysplasia, late (SEDL), mRNA. /PROD=spondyloepiphyseal dysplasia, late /FL=gb:NM_014563.1	trafficking protein particle complex 2	TRAPPC2	chrXp22	NP_001011658 /// NP_001122307 /// NP_055378	NM_001011658 /// NM_001128835 /// NM_014563	6.64897	5.733	7.69638	4.00808	3.79927	6.48395	0.33112	0.0427867	Down
BG260394	Hs.21374 /// Hs.604559	6622	gb:BG260394 /DB_XREF=gi:12770210 /DB_XREF=602371523F1 /CLONE=IMAGE:4479556 /FEA=FLmRNA /CNT=101 /TID=Hs.76930.1 /TIER=Stack /STK=16 /UG=Hs.76930 /LL=6622 /UG_GENE=SNCA /UG_TITLE=synuclein, alpha (non A4 component of amyloid precursor) /FL=gb:NM_000345.2 gb:L08850.1	synuclein, alpha (non A4 component of amyloid precursor)	SNCA	chr4q21	NP_000336 /// NP_001139526 /// NP_001139527 /// NP_009292	NM_000345 /// NM_001146054 /// NM_001146055 /// NM_007308	4.49984	5.32071	4.02909	2.66692	3.86127	2.37651	0.33043	0.0042527	Down
NM_001860	Hs.24030	1318	gb:NM_001860.1 /DB_XREF=gi:4507016 /GEN=SLC31A2 /FEA=FLmRNA /CNT=90 /TID=Hs.24030.0 /TIER=FL+Stack /STK=29 /UG=Hs.24030 /LL=1318 /DEF=Homo sapiens solute carrier family 31 (copper transporters), member 2 (SLC31A2), mRNA. /PROD=solute carrier family 31 (copper transporters),member 2 /FL=gb:NM_001860.1 gb:U83461.1	solute carrier family 31 (copper transporters), member 2	SLC31A2	chr9q32	NP_001851	NM_001860	5.40413	5.45453	7.51504	3.76302	4.53433	5.69544	0.329114	0.0336645	Down
NM_025067	---	114818	gb:NM_025067.1 /DB_XREF=gi:13376606 /GEN=FLJ14106 /FEA=FLmRNA /CNT=8 /TID=Hs.287872.0 /TIER=FL /STK=2 /UG=Hs.287872 /LL=80137 /DEF=Homo sapiens hypothetical protein FLJ14106 (FLJ14106), mRNA. /PROD=hypothetical protein FLJ14106 /FL=gb:NM_025067.1	kelch-like family member 29	KLHL29	chr2p24.1	NP_443152	NM_025067 /// NM_052920	4.69969	6.21551	4.25291	3.16372	4.56912	2.58853	0.324338	0.00061682	Down
BE562520	Hs.602164	---	gb:BE562520 /DB_XREF=gi:9806240 /DB_XREF=601335817F1 /CLONE=IMAGE:3689740 /FEA=EST /CNT=12 /TID=Hs.125720.0 /TIER=ConsEnd /STK=0 /UG=Hs.125720 /UG_TITLE=ESTs	---	---	---	---	---	7.0209	8.27733	7.57014	4.71812	6.81019	6.01447	0.322433	0.0215698	Down
BF514509	Hs.634293	---	gb:BF514509 /DB_XREF=gi:11599688 /DB_XREF=UI-H-BW1-anf-g-03-0-UI.s1 /CLONE=IMAGE:3082180 /FEA=EST /CNT=7 /TID=Hs.262571.0 /TIER=ConsEnd /STK=3 /UG=Hs.262571 /UG_TITLE=ESTs	---	---	---	---	---	5.65287	7.04274	7.24678	3.02664	5.22182	5.94523	0.32057	0.0381436	Down
BE568660	Hs.707141 /// Hs.707377 /// Hs.731537	91612	gb:BE568660 /DB_XREF=gi:9812380 /DB_XREF=601342677F1 /CLONE=IMAGE:3684954 /FEA=EST /CNT=39 /TID=Hs.228598.0 /TIER=Stack /STK=18 /UG=Hs.228598 /UG_TITLE=ESTs	churchill domain containing 1	CHURC1	chr14q23.3	NP_001190992 /// NP_001190993 /// NP_660148	NM_001204063 /// NM_001204064 /// NM_145165	5.68733	7.02668	7.59539	4.41192	5.1886	5.96549	0.320383	0.0106196	Down
NM_016151	Hs.291623	9344	gb:NM_016151.1 /DB_XREF=gi:7706400 /GEN=PSK /FEA=FLmRNA /CNT=38 /TID=Hs.66141.0 /TIER=FL /STK=0 /UG=Hs.66141 /LL=51677 /DEF=Homo sapiens prostate derived STE20-like kinase PSK (PSK), mRNA. /PROD=prostate derived STE20-like kinase PSK /FL=gb:NM_016151.1 gb:AF061943.1	TAO kinase 2	TAOK2	chr16p11.2	NP_001238972 /// NP_004774 /// NP_057235	NM_001252043 /// NM_004783 /// NM_016151	5.16957	7.83779	8.18356	3.5604	6.3805	6.37242	0.320362	0.00395015	Down
AF253977	Hs.523702 /// Hs.744079	64231	gb:AF253977.1 /DB_XREF=gi:12005800 /FEA=FLmRNA /CNT=132 /TID=Hs.17914.1 /TIER=FL+Stack /STK=74 /UG=Hs.17914 /LL=64231 /UG_GENE=MS4A6 /DEF=Homo sapiens HAIRB-iso mRNA, complete cds. /PROD=HAIRB-iso /FL=gb:AF261136.1 gb:AF253977.1 gb:AF212240.1	membrane-spanning 4-domains, subfamily A, member 6A	MS4A6A	chr11q12.1	NP_001234928 /// NP_071744 /// NP_690590 /// NP_690591	NM_001247999 /// NM_022349 /// NM_152851 /// NM_152852	6.12155	7.83453	5.9197	4.6138	5.99022	4.70639	0.318508	0.0140468	Down
BF693956	Hs.446414 /// Hs.674188 /// Hs.702403 /// Hs.713993	961	gb:BF693956 /DB_XREF=gi:11979364 /DB_XREF=602082535F1 /CLONE=IMAGE:4246664 /FEA=EST /CNT=66 /TID=Hs.82685.2 /TIER=ConsEnd /STK=0 /UG=Hs.82685 /LL=961 /UG_GENE=CD47 /UG_TITLE=CD47 antigen (Rh-related antigen, integrin-associated signal transducer)	CD47 molecule	CD47	chr3q13.1-q13.2	NP_001768 /// NP_942088	NM_001025079 /// NM_001025080 /// NM_001777 /// NM_198793	7.00716	8.06706	6.6906	5.19222	6.23211	5.55773	0.317598	0.0203157	Down
AK002165	Hs.476930	25978	gb:AK002165.1 /DB_XREF=gi:7023876 /FEA=FLmRNA /CNT=160 /TID=Hs.11449.0 /TIER=Stack /STK=30 /UG=Hs.11449 /LL=25978 /UG_GENE=DKFZP564O123 /UG_TITLE=DKFZP564O123 protein /DEF=Homo sapiens cDNA FLJ11303 fis, clone PLACE1009995, highly similar to Homo sapiens mRNA; cDNA DKFZp564O123. /FL=gb:AL080122.1 gb:AF151842.1 gb:NM_014043.1	charged multivesicular body protein 2B	CHMP2B	chr3p11.2	NP_001231573 /// NP_054762	NM_001244644 /// NM_014043	4.60635	5.33816	6.46786	3.50618	3.95143	4.43635	0.31621	0.0318467	Down
NM_144573	Hs.612385	91624	gb:NM_144573.1 /DB_XREF=gi:21389338 /GEN=nexilin /TID=Hs2.216381.1 /CNT=24 /FEA=FLmRNA /TIER=FL+Stack /STK=8 /LL=91624 /UG=Hs.216381 /DEF=Homo sapiens likely ortholog of rat F-actin binding protein nexilin (nexilin), mRNA. /PROD=likely ortholog of rat F-actin binding proteinnexilin /FL=gb:NM_144573.1	nexilin (F actin binding protein)	NEXN	chr1p31.1	NP_001165780 /// NP_653174	NM_001172309 /// NM_144573	5.08491	6.02886	5.8313	3.2176	3.73337	4.67951	0.308817	0.0336828	Down
AK024819	Hs.670861	---	gb:AK024819.1 /DB_XREF=gi:10437219 /FEA=mRNA /CNT=1 /TID=Hs.306705.0 /TIER=ConsEnd /STK=0 /UG=Hs.306705 /UG_TITLE=Homo sapiens cDNA: FLJ21166 fis, clone CAS10851 /DEF=Homo sapiens cDNA: FLJ21166 fis, clone CAS10851.	---	---	---	---	---	5.21836	4.92688	6.46216	3.77776	3.65172	4.44691	0.308662	0.0196299	Down
AI251399	Hs.466987	25865	gb:AI251399 /DB_XREF=gi:3847928 /DB_XREF=qv38c04.x1 /CLONE=IMAGE:1983846 /FEA=EST /CNT=7 /TID=Hs.145334.0 /TIER=ConsEnd /STK=0 /UG=Hs.145334 /UG_TITLE=ESTs	protein kinase D2	PRKD2	chr19q13.3	NP_001073349 /// NP_001073350 /// NP_001073351 /// NP_057541	NM_001079880 /// NM_001079881 /// NM_001079882 /// NM_016457	9.12526	8.15816	8.56357	6.83834	6.60639	7.34621	0.306421	0.0333831	Down
BM728509	Hs.680634	---	gb:BM728509 /DB_XREF=gi:19049842 /DB_XREF=UI-E-EJ0-aiu-i-14-0-UI.r1 /CLONE=UI-E-EJ0-aiu-i-14-0-UI /TID=Hs2.350953.1 /CNT=3 /FEA=mRNA /TIER=ConsEnd /STK=0 /UG=Hs.350953 /UG_TITLE=Homo sapiens, clone IMAGE:4294221, mRNA	---	---	---	---	---	5.37629	6.89615	6.70061	2.78619	4.6699	5.59683	0.30511	0.04773	Down
AU147166	Hs.661865	---	gb:AU147166 /DB_XREF=gi:11008687 /DB_XREF=AU147166 /CLONE=HEMBB1002582 /FEA=mRNA /CNT=6 /TID=Hs.301683.0 /TIER=ConsEnd /STK=1 /UG=Hs.301683 /UG_TITLE=Homo sapiens cDNA FLJ12091 fis, clone HEMBB1002582	---	---	---	---	---	5.72225	5.49878	6.22541	3.51218	3.9483	4.62779	0.29838	0.0138547	Down
AI872403	Hs.176503	23216	gb:AI872403 /DB_XREF=gi:5546452 /DB_XREF=wm58e06.x1 /CLONE=IMAGE:2440162 /TID=Hs2.203722.1 /CNT=6 /FEA=mRNA /TIER=ConsEnd /STK=2 /UG=Hs.203722 /UG_TITLE=Homo sapiens, clone IMAGE:5176169, mRNA	TBC1 (tre-2/USP6, BUB2, cdc16) domain family, member 1	TBC1D1	chr4p14	NP_001240841 /// NP_001240842 /// NP_001240843 /// NP_001240844 /// NP_055988	NM_001253912 /// NM_001253913 /// NM_001253914 /// NM_001253915 /// NM_015173	6.43024	6.03603	5.935	3.94884	4.55825	4.61623	0.298204	0.0402305	Down
BQ184262	Hs.659491	---	gb:BQ184262 /DB_XREF=gi:20359813 /DB_XREF=UI-E-EJ1-ajs-k-02-0-UI.s1 /CLONE=UI-E-EJ1-ajs-k-02-0-UI /TID=Hs2.47578.1 /CNT=11 /FEA=mRNA /TIER=ConsEnd /STK=3 /UG=Hs.47578 /UG_TITLE=Homo sapiens mRNA full length insert cDNA clone EUROIMAGE 283668.	NULL	MESDC1	---	---	---	5.74888	5.70829	5.50684	3.5171	3.57334	4.44395	0.297748	0.040256	Down
AF237908	Hs.523702 /// Hs.744079	64231	gb:AF237908.1 /DB_XREF=gi:13649404 /FEA=FLmRNA /CNT=1 /TID=HsAffx.900505.391 /TIER=FL /STK=0 /DEF=Homo sapiens MS4A6A protein mRNA, complete cds. /PROD=MS4A6A protein /FL=gb:AF237908.1	membrane-spanning 4-domains, subfamily A, member 6A	MS4A6A	chr11q12.1	NP_001234928 /// NP_071744 /// NP_690590 /// NP_690591	NM_001247999 /// NM_022349 /// NM_152851 /// NM_152852	5.99462	8.00187	5.55129	4.56873	5.91458	4.6256	0.2963	0.0479992	Down
R59093	Hs.34024	23043	gb:R59093 /DB_XREF=gi:829788 /DB_XREF=yh03e12.s1 /CLONE=IMAGE:41943 /FEA=FLmRNA /CNT=70 /TID=Hs.170204.0 /TIER=ConsEnd /STK=4 /UG=Hs.170204 /LL=23043 /UG_GENE=KIAA0551 /UG_TITLE=KIAA0551 protein /FL=gb:AF172264.1	TRAF2 and NCK interacting kinase	TNIK	chr3q26.31	NP_001155032 /// NP_001155033 /// NP_001155034 /// NP_001155035 /// NP_001155036 /// NP_001155037 /// NP_001155038 /// NP_055843	NM_001161560 /// NM_001161561 /// NM_001161562 /// NM_001161563 /// NM_001161564 /// NM_001161565 /// NM_001161566 /// NM_015028 /// NR_027767	5.33491	4.27797	4.86729	3.19093	2.8561	3.24525	0.290672	0.0151414	Down
BC039392	Hs.658541	100506142	gb:BC039392.1 /DB_XREF=gi:24659821 /TID=Hs2.153749.1 /CNT=6 /FEA=mRNA /TIER=ConsEnd /STK=2 /UG=Hs.153749 /UG_TITLE=Homo sapiens, clone IMAGE:5298960, mRNA /DEF=Homo sapiens, clone IMAGE:5298960, mRNA.	uncharacterized LOC100506142	LOC100506142	chr2p21	---	XR_109982 /// XR_112318	4.2581	5.61129	5.98591	3.10861	3.84178	3.91097	0.289247	0.025721	Down
AF064801	Hs.744151	11236	gb:AF064801.1 /DB_XREF=gi:3395786 /GEN=TRC8 /FEA=FLmRNA /CNT=90 /TID=Hs.28285.0 /TIER=FL+Stack /STK=36 /UG=Hs.28285 /LL=11236 /DEF=Homo sapiens multiple membrane spanning receptor TRC8 (TRC8) mRNA, complete cds. /PROD=multiple membrane spanning receptor TRC8 /FL=gb:AF064801.1 gb:NM_007218.1	ring finger protein 139	RNF139	chr8q24	NP_009149	NM_007218	5.55499	7.49469	7.05873	4.04452	5.14506	5.68308	0.2863	0.0291525	Down
NM_014950	Hs.605143 /// Hs.723486	22890	gb:NM_014950.1 /DB_XREF=gi:7662437 /GEN=KIAA0997 /FEA=FLmRNA /CNT=35 /TID=Hs.24083.0 /TIER=FL /STK=3 /UG=Hs.24083 /LL=22890 /DEF=Homo sapiens KIAA0997 protein (KIAA0997), mRNA. /PROD=KIAA0997 protein /FL=gb:AB023214.1 gb:NM_014950.1	zinc finger and BTB domain containing 1	ZBTB1	chr14q23.3	NP_001116801 /// NP_055765	NM_001123329 /// NM_014950	4.74322	5.34591	5.79258	2.97136	3.18419	4.17435	0.284723	0.00755366	Down
NM_006179	Hs.266902 /// Hs.598703 /// Hs.743915	4909	gb:NM_006179.1 /DB_XREF=gi:5453807 /GEN=NTF5 /FEA=FLmRNA /CNT=9 /TID=Hs.266902.0 /TIER=ConsEnd /STK=0 /UG=Hs.266902 /LL=4909 /DEF=Homo sapiens neurotrophin 5 (neurotrophin 45) (NTF5), mRNA. /PROD=neurotrophin 5 precursor /FL=gb:NM_006179.1	neurotrophin 4	NTF4	chr19q13.3	NP_006170	NM_006179	5.21403	5.69671	4.60764	3.19435	3.79296	3.19747	0.283937	0.0108678	Down
Y12885	Hs.468274 /// Hs.610508 /// Hs.624386	6546	gb:Y12885.1 /DB_XREF=gi:2463210 /TID=Hs2.407280.4 /CNT=1 /FEA=mRNA /TIER=ConsEnd /STK=0 /UG=Hs.407280 /UG_TITLE=Homo sapiens NCX1 mRNA alternative 5end, exon 1c and 2 /DEF=Homo sapiens NCX1 mRNA alternative 5end, exon 1d and 2.	solute carrier family 8 (sodium/calcium exchanger), member 1	SLC8A1	chr2p23-p22	NP_001106271 /// NP_001106272 /// NP_001106273 /// NP_001239553 /// NP_066920	NM_001112800 /// NM_001112801 /// NM_001112802 /// NM_001252624 /// NM_021097	5.59459	5.49903	6.11403	3.51202	3.47408	4.56689	0.283901	0.00800771	Down
NM_030786	Hs.712631	81493	gb:NM_030786.1 /DB_XREF=gi:13540560 /GEN=SYNCOILIN /FEA=FLmRNA /CNT=1 /TID=HsAffx.900059.68 /TIER=FL /STK=0 /DEF=Homo sapiens intermediate filament protein syncoilin (SYNCOILIN), mRNA. /PROD=intermediate filament protein syncoilin /FL=gb:NM_030786.1	syncoilin, intermediate filament protein	SYNC	chr1p35.1	NP_001155180 /// NP_110413	NM_001161708 /// NM_030786	6.3539	6.26239	6.58688	4.14651	4.22075	5.08162	0.275705	0.0119846	Down
BG493972	Hs.511138 /// Hs.737856 /// Hs.744941	25963	gb:BG493972 /DB_XREF=gi:13455486 /DB_XREF=602542252F1 /CLONE=IMAGE:4673316 /FEA=mRNA /CNT=222 /TID=Hs.16492.0 /TIER=Stack /STK=38 /UG=Hs.16492 /LL=25963 /UG_GENE=DKFZP564G2022 /UG_TITLE=DKFZP564G2022 protein	transmembrane protein 87A	TMEM87A	chr15q15.1	NP_001103973 /// NP_056312	NM_001110503 /// NM_015497	6.92342	7.67854	7.7169	4.14064	5.65663	6.18221	0.262186	0.0282896	Down
AF151018	Hs.250905	51234	gb:AF151018.1 /DB_XREF=gi:7106757 /FEA=FLmRNA /CNT=243 /TID=Hs.250905.1 /TIER=FL+Stack /STK=131 /UG=Hs.250905 /LL=51234 /UG_GENE=LOC51234 /DEF=Homo sapiens HSPC184 mRNA, complete cds. /PROD=HSPC184 /FL=gb:AF151018.1 gb:NM_016454.1	ER membrane protein complex subunit 4	EMC4	chr15q14	NP_057538	NM_016454	4.34678	5.94063	6.30166	3.23853	3.96916	4.06107	0.26014	0.0351475	Down
BE867789	Hs.655455	5819	gb:BE867789 /DB_XREF=gi:10316565 /DB_XREF=601443751F1 /CLONE=IMAGE:3847692 /FEA=DNA_1 /CNT=12 /TID=Hs.324036.0 /TIER=ConsEnd /STK=0 /UG=Hs.324036 /UG_TITLE=Homo sapiens clone F19374 APO E-C2 gene cluster	poliovirus receptor-related 2 (herpesvirus entry mediator B)	PVRL2	chr19q13.2	NP_001036189 /// NP_002847	NM_001042724 /// NM_002856	4.73714	5.28131	4.82512	3.31446	3.01944	2.51284	0.253064	0.0202011	Down
AF147427	Hs.580681	25939	gb:AF147427.1 /DB_XREF=gi:4761778 /TID=Hs2.407312.1 /CNT=4 /FEA=mRNA /TIER=ConsEnd /STK=0 /UG=Hs.407312 /UG_TITLE=Homo sapiens full length insert cDNA clone YP80A10 /DEF=Homo sapiens full length insert cDNA clone YP80A10.	SAM domain and HD domain 1	SAMHD1	chr20pter-q12	NP_056289	NM_015474	5.67103	4.87557	6.27168	3.21641	3.14796	4.42161	0.251253	0.0122611	Down
S80491	Hs.661108	---	gb:S80491.1 /DB_XREF=gi:1246099 /GEN=stem cell factor, SCF /FEA=mRNA /CNT=1 /TID=Hs.123028.0 /TIER=ConsEnd /STK=0 /UG=Hs.123028 /DEF=stem cell factor {alternatively spliced} (human, preimplantation embryos, blastocysts, mRNA Partial, 180 nt). /PROD=stem cell factor	---	---	---	---	---	4.83407	5.84091	5.75461	3.18328	3.61623	3.75283	0.249069	0.00719142	Down
AI167682	Hs.143713	---	gb:AI167682 /DB_XREF=gi:3700852 /DB_XREF=oz93d06.x1 /CLONE=IMAGE:1682891 /FEA=EST /CNT=3 /TID=Hs.143713.0 /TIER=ConsEnd /STK=3 /UG=Hs.143713 /UG_TITLE=ESTs	---	---	---	---	---	5.18338	6.33446	6.67506	3.74791	3.5193	4.68456	0.230892	0.035172	Down
CA447177	Hs.472854 /// Hs.612734	90203	gb:CA447177 /DB_XREF=gi:24811597 /DB_XREF=UI-H-EI0-ayd-g-20-0-UI.s1 /CLONE=UI-H-EI0-ayd-g-20-0-UI /TID=Hs2.334538.2 /CNT=30 /FEA=FLmRNA /TIER=Stack /STK=8 /LL=90203 /UG_GENE=C20orf161 /UG=Hs.334538 /UG_TITLE=chromosome 20 open reading frame 161 /FL=gb:NM_152897.1 gb:BC019823.1	sorting nexin family member 21	SNX21	chr20q13.12	NP_001036097 /// NP_001036098 /// NP_219489 /// NP_690857	NM_001042632 /// NM_001042633 /// NM_033421 /// NM_152897	5.72129	4.7336	5.3955	2.65268	2.25228	3.92425	0.216001	0.0375048	Down
AA746320	Hs.184492 /// Hs.641056 /// Hs.713744	1994	gb:AA746320 /DB_XREF=gi:2786306 /DB_XREF=ob08f01.s1 /CLONE=IMAGE:1323097 /FEA=EST /CNT=3 /TID=Hs.129572.0 /TIER=ConsEnd /STK=3 /UG=Hs.129572 /UG_TITLE=ESTs	ELAV (embryonic lethal, abnormal vision, Drosophila)-like 1 (Hu antigen R)	ELAVL1	chr19p13.2	NP_001410	NM_001419	5.20399	5.71273	5.83362	3.4111	2.52199	3.7691	0.205113	0.0316113	Down
BF988443	Hs.260074 /// Hs.669832	1588 /// 100652954	gb:BF988443 /DB_XREF=gi:12394768 /DB_XREF=MR1-GN0172-161000-001-f08 /FEA=EST /CNT=8 /TID=Hs.187471.1 /TIER=ConsEnd /STK=0 /UG=Hs.187471 /UG_TITLE=ESTs	cytochrome P450, family 19, subfamily A, polypeptide 1 /// uncharacterized LOC100652954	CYP19A1 /// LOC100652954	chr15q21.1	NP_000094 /// NP_112503	NM_000103 /// NM_031226 /// XR_132592 /// XR_159249 /// XR_172082	6.82137	5.06069	5.07515	3.72431	2.64462	3.74966	0.182714	0.0476005	Down
NM_144613	Hs.550544 /// Hs.736127	125965	gb:NM_144613.1 /DB_XREF=gi:21389424 /TID=Hs2.343765.1 /CNT=3 /FEA=FLmRNA /TIER=FL /STK=1 /LL=125965 /UG_GENE=FLJ32865 /UG=Hs.343765 /UG_TITLE=hypothetical protein FLJ32865 /DEF=Homo sapiens hypothetical protein FLJ32865 (FLJ32865), mRNA. /FL=gb:NM_144613.1	cytochrome c oxidase subunit VIb polypeptide 2 (testis)	COX6B2	chr19q13.42	NP_653214	NM_144613	8.54849	7.36585	6.86828	5.40742	5.36615	4.96264	0.175054	0.0274082	Down
AW189885	Hs.518989 /// Hs.591691 /// Hs.738416	54510	gb:AW189885 /DB_XREF=gi:6464365 /DB_XREF=xl57f01.x1 /CLONE=IMAGE:2678809 /FEA=mRNA /CNT=65 /TID=Hs.97266.0 /TIER=Stack /STK=21 /UG=Hs.97266 /LL=54510 /UG_GENE=PCDH18 /UG_TITLE=protocadherin 18	protocadherin 18	PCDH18	chr4q31	NP_061908	NM_019035	6.74809	6.74684	4.89434	3.88083	3.90626	3.07869	0.156044	0.0185265	Down
AW025330	Hs.12554	266812	gb:AW025330 /DB_XREF=gi:5878860 /DB_XREF=wu73f04.x1 /CLONE=IMAGE:2525695 /FEA=EST /CNT=24 /TID=Hs.12554.1 /TIER=Stack /STK=18 /UG=Hs.12554 /UG_TITLE=ESTs, Weakly similar to NPL4_HUMAN NUCLEOSOME ASSEMBLY PROTEIN 1-LIKE 4 (H.sapiens)	nucleosome assembly protein 1-like 5	NAP1L5	chr4q22.1|4q21-q22	NP_715638	NM_153757	4.01967	5.65103	6.07409	1.83007	2.79279	3.35973	0.15504	0.00611075	Down
AI879064	---	8745	gb:AI879064 /DB_XREF=gi:5553113 /DB_XREF=au54a03.y1 /CLONE=IMAGE:2518540 /FEA=EST /CNT=11 /TID=Hs.54618.0 /TIER=ConsEnd /STK=0 /UG=Hs.54618 /UG_TITLE=ESTs	ADAM metallopeptidase domain 23	ADAM23	chr2q33	NP_003803	NM_003812	6.65517	6.76166	5.27624	4.1436	3.53824	3.07932	0.152165	0.0129325	Down
NM_018153	Hs.165859 /// Hs.610325 /// Hs.625840	84168	gb:NM_018153.1 /DB_XREF=gi:8922545 /GEN=FLJ10601 /FEA=FLmRNA /CNT=18 /TID=Hs.257174.0 /TIER=FL /STK=2 /UG=Hs.257174 /LL=55185 /DEF=Homo sapiens hypothetical protein FLJ10601 (FLJ10601), mRNA. /PROD=hypothetical protein FLJ10601 /FL=gb:NM_018153.1	anthrax toxin receptor 1	ANTXR1	chr2p13.1	NP_060623 /// NP_115584 /// NP_444262	NM_018153 /// NM_032208 /// NM_053034	7.88526	8.29379	5.44938	4.05917	5.84084	3.11521	0.139155	0.0266961	Down

## Sheet: Summary
	Header line description of worksheet "Quant"
	Project	Description
	Representative_Public_ID	The ID number of the gene in the NCBI public database (http://www.ncbi.nlm.nih.gov/nuccore)
	UniGene_ID	The ID number of the gene in the UniGene (Universal Gene) database
	Entrez_Gene	The ID number of the gene in the NCBI entrez'gene database(http://www.ncbi.nlm.nih.gov/gene)
	Target_Description	Description of the target sequence
	Gene_Title	Specific names of gene
	Gene_Symbol	Abbreviations of gene
	Chromosomal_Location	the Location of chromosomal
	RefSeq_Protein_ID	The ID number of the protein in the NCBI RefSeq database(http://www.ncbi.nlm.nih.gov/refseq/)
	RefSeq_Transcript_ID	The ID number of the transcript in the NCBI RefSeq database(http://www.ncbi.nlm.nih.gov/refseq/)
	G2	Paraffin tissues of Pre-Radiotharapy patients
	G3	Paraffin tissues of Post-Radiotherapy patients
	Differential gene expression in the worksheet "Quant"
	Compare group	Regulated type	Fold Change >2(< 0.5)	P value
	Post-Radiotherapy/Pre-Radiotharapy	up-regulated	155	< 0.05
		down-regulated	137	< 0.05
			NP_001945 /// NP_054699 /// NP_054700
